# Supplementary material
Source: publisher figshare collection journal article supplement (https://gsajournals.figshare.com/ndownloader/files/18714668)
Supplement: Supplementary file 1 [file 18714668]

## Sheet: Sheet1
Code	Gene_id	90128_72_readcount(90128_72vsck)	ck_readcount(90128_72vsck)	log2FoldChange(90128_72vsck)	pval(90128_72vsck)	padj(90128_72vsck)	significant(90128_72vsck)	biological_process	biological_process_description	cellular_component	cellular_component_description	molecular_function	molecular_function_description	KEGG AnnotInfo	KEGG url	Gene name	Interpro Description
1	Novel00009	150.709	49.2302	1.6142	0.00082458	0.010076	UP	GO:0007267//GO:0009987//GO:0023052//GO:0008150//GO:0007154//GO:0007268	cell-cell signaling//cellular process//signaling//biological_process//cell communication//chemical synaptic transmission	GO:0016020//GO:0005575//GO:0016021//GO:0044425//GO:0031224	membrane//cellular_component//integral component of membrane//membrane part//intrinsic component of membrane	GO:0003674//GO:0043495//GO:0033130//GO:0005102//GO:0005488//GO:0005515	molecular_function//protein membrane anchor//acetylcholine receptor binding//signaling receptor binding//binding//protein binding	--	--	--	--
2	Novel00094	595.172	282.927	1.0729	0.00076211	0.0094289	UP	GO:0022607//GO:0071840//GO:0006996//GO:1902208//GO:0010467//GO:0009058//GO:0060491//GO:0006807//GO:0030031//GO:0044238//GO:0046483//GO:0016043//GO:0090304//GO:0031344//GO:0016070//GO:0033043//GO:0034641//GO:0010468//GO:0032774//GO:0065007//GO:0050794//GO:0018130//GO:1903508//GO:0010556//GO:0060255//GO:0034654//GO:0044085//GO:0009891//GO:0051254//GO:0045893//GO:0009059//GO:0051128//GO:0019219//GO:…	cellular component assembly//cellular component organization or biogenesis//organelle organization//regulation of bacterial-type flagellum assembly//gene expression//biosynthetic process//regulation of cell projection assembly//nitrogen compound metabolic process//cell projection assembly//primary metabolic process//heterocycle metabolic process//cellular component organization//nucleic acid meta…	--	--	GO:0003677//GO:0005488//GO:0097159//GO:1901363//GO:0003676//GO:0003674	DNA binding//binding//organic cyclic compound binding//heterocyclic compound binding//nucleic acid binding//molecular_function	K15103 solute carrier family 25 (mitochondrial uncoupling protein), member 8/9 | (RefSeq) mitochondrial uncoupling protein 2-like	http://www.genome.jp/dbget-bin/www_bget?sot:102582948	--	PREDICTED: mitochondrial uncoupling protein 2-like isoform X1 [Solanum tuberosum]>gi|565356950|ref|XP_006345321.1| PREDICTED: mitochondrial uncoupling protein 2-like isoform X2 [Solanum tuberosum]
3	Novel00117	125.372	2.6723	5.552	0.0029197	0.026413	UP	GO:0008150//GO:0008152	biological_process//metabolic process	--	--	GO:0016838//GO:0016835//GO:0010333//GO:0003824//GO:0003674//GO:0016829	carbon-oxygen lyase activity, acting on phosphates//carbon-oxygen lyase activity//terpene synthase activity//catalytic activity//molecular_function//lyase activity	K15803 (-)-germacrene D synthase [EC:4.2.3.22 4.2.3.75] | (RefSeq) (E,E)-germacrene B synthase-like	http://www.genome.jp/dbget-bin/www_bget?sot:102582072	--	PREDICTED: germacrene C synthase-like [Solanum tuberosum]
4	Novel00153	843.779	56.6156	3.8976	2.9231e-14	5.734e-12	UP	GO:0008152//GO:0055114//GO:0008150	metabolic process//oxidation-reduction process//biological_process	--	--	GO:0003674//GO:0016717//GO:0016491//GO:0003824//GO:0016705	molecular_function//oxidoreductase activity, acting on paired donors, with oxidation of a pair of donors resulting in the reduction of molecular oxygen to two molecules of water//oxidoreductase activity//catalytic activity//oxidoreductase activity, acting on paired donors, with incorporation or reduction of molecular oxygen	no KO assigned | (RefSeq) delta(12) oleic acid desaturase FAD2-like	http://www.genome.jp/dbget-bin/www_bget?sot:102598608	--	lipid desaturase-like protein [Solanum lycopersicum]
5	Novel00169	409.608	128.701	1.6702	3.265e-06	9.9138e-05	UP	GO:0008152//GO:0071704//GO:0097659//GO:0006351//GO:0034645//GO:0006725//GO:1901576//GO:0044260//GO:0019438//GO:0044249//GO:0008150//GO:0009987//GO:1901362//GO:0044237//GO:0044271//GO:0006139//GO:1901360//GO:0043170//GO:0009059//GO:0018130//GO:0034654//GO:0016070//GO:0034641//GO:0032774//GO:0046483//GO:0044238//GO:0090304//GO:0010467//GO:0009058//GO:0006807	metabolic process//organic substance metabolic process//nucleic acid-templated transcription//transcription, DNA-templated//cellular macromolecule biosynthetic process//cellular aromatic compound metabolic process//organic substance biosynthetic process//cellular macromolecule metabolic process//aromatic compound biosynthetic process//cellular biosynthetic process//biological_process//cellular pr…	--	--	GO:0016301//GO:0003887//GO:0003674//GO:0016779//GO:1901363//GO:0003676//GO:0003824//GO:0016740//GO:0097159//GO:0005488//GO:0003677//GO:0034061//GO:0004672//GO:0016772//GO:0004674//GO:0016773//GO:0005515	kinase activity//DNA-directed DNA polymerase activity//molecular_function//nucleotidyltransferase activity//heterocyclic compound binding//nucleic acid binding//catalytic activity//transferase activity//organic cyclic compound binding//binding//DNA binding//DNA polymerase activity//protein kinase activity//transferase activity, transferring phosphorus-containing groups//protein serine/threonine k…	K20222 importin-5 | (RefSeq) importin-5-like	http://www.genome.jp/dbget-bin/www_bget?sot:102599837	--	PREDICTED: importin-5-like [Solanum tuberosum]
6	Novel00271	858.731	230.833	1.8954	5.4092e-06	0.00015434	UP	--	--	--	--	--	--	no KO assigned | (RefSeq) uncharacterized LOC102590399	http://www.genome.jp/dbget-bin/www_bget?sot:102590399	--	PREDICTED: uncharacterized protein LOC101244900 [Solanum lycopersicum]
7	Novel00535	237.295	100.815	1.235	0.0023756	0.022637	UP	GO:0006468//GO:0044238//GO:0036211//GO:0019538//GO:0044267//GO:0043170//GO:0016310//GO:0006464//GO:0044237//GO:0009987//GO:0006796//GO:0043412//GO:0008150//GO:0071704//GO:0044260//GO:0008152//GO:0006793	protein phosphorylation//primary metabolic process//protein modification process//protein metabolic process//cellular protein metabolic process//macromolecule metabolic process//phosphorylation//cellular protein modification process//cellular metabolic process//cellular process//phosphate-containing compound metabolic process//macromolecule modification//biological_process//organic substance meta…	--	--	GO:0016773//GO:0004713//GO:0000166//GO:0001883//GO:0004672//GO:0001882//GO:0016772//GO:0097367//GO:1901265//GO:0017076//GO:0004715//GO:0043168//GO:0005488//GO:0032549//GO:0032559//GO:0097159//GO:1901363//GO:0003824//GO:0030554//GO:0016740//GO:0043167//GO:0003674//GO:0036094//GO:0016301//GO:0032553//GO:0005524//GO:0035639//GO:0032555//GO:0032550	phosphotransferase activity, alcohol group as acceptor//protein tyrosine kinase activity//nucleotide binding//purine nucleoside binding//protein kinase activity//nucleoside binding//transferase activity, transferring phosphorus-containing groups//carbohydrate derivative binding//nucleoside phosphate binding//purine nucleotide binding//non-membrane spanning protein tyrosine kinase activity//anion …	no KO assigned | (RefSeq) protein GAMETE EXPRESSED 2	http://www.genome.jp/dbget-bin/www_bget?sot:102589503	--	PREDICTED: protein GAMETE EXPRESSED 2-like isoform X2 [Solanum tuberosum]
8	Novel00542	118.25	18.1134	2.7067	0.00023563	0.0036441	UP	GO:0071804//GO:0034220//GO:0098660//GO:0030001//GO:0015672//GO:0008150//GO:0098662//GO:0006810//GO:0051234//GO:0009987//GO:0098655//GO:0006811//GO:0055085//GO:0006812//GO:0006813//GO:0071805//GO:0051179	cellular potassium ion transport//ion transmembrane transport//inorganic ion transmembrane transport//metal ion transport//monovalent inorganic cation transport//biological_process//inorganic cation transmembrane transport//transport//establishment of localization//cellular process//cation transmembrane transport//ion transport//transmembrane transport//cation transport//potassium ion transport//…	GO:0071944//GO:0005789//GO:0005737//GO:0005887//GO:0098588//GO:0043227//GO:0016020//GO:0005886//GO:0043231//GO:0005575//GO:0005783//GO:0043226//GO:0042175//GO:0044459//GO:0044424//GO:0031226//GO:0044425//GO:0031090//GO:0043229//GO:0044446//GO:0044422//GO:0016021//GO:0005623//GO:0044444//GO:0044432//GO:0044464//GO:0012505//GO:0031224//GO:0005622	cell periphery//endoplasmic reticulum membrane//cytoplasm//integral component of plasma membrane//bounding membrane of organelle//membrane-bounded organelle//membrane//plasma membrane//intracellular membrane-bounded organelle//cellular_component//endoplasmic reticulum//organelle//nuclear outer membrane-endoplasmic reticulum membrane network//plasma membrane part//intracellular part//intrinsic com…	GO:0015077//GO:0003674//GO:0022857//GO:0015079//GO:0008324//GO:0015075//GO:0022890//GO:0005215//GO:0046873	monovalent inorganic cation transmembrane transporter activity//molecular_function//transmembrane transporter activity//potassium ion transmembrane transporter activity//cation transmembrane transporter activity//ion transmembrane transporter activity//inorganic cation transmembrane transporter activity//transporter activity//metal ion transmembrane transporter activity	no KO assigned | (RefSeq) uncharacterized LOC102593112	http://www.genome.jp/dbget-bin/www_bget?sot:102593112	--	PREDICTED: uncharacterized protein LOC102593112 [Solanum tuberosum]
9	Novel00569	1464.19	592.469	1.3053	7.1797e-06	0.00019859	UP	--	--	--	--	--	--	no KO assigned | (RefSeq) uncharacterized LOC102606059	http://www.genome.jp/dbget-bin/www_bget?sot:102606059	--	PREDICTED: uncharacterized protein LOC102606059 [Solanum tuberosum]
10	Novel00626	48.89	0.285708	7.4189	2.4193e-06	7.6416e-05	UP	--	--	--	--	GO:0046872//GO:0016838//GO:0016835//GO:0010333//GO:0005488//GO:0043169//GO:0043167//GO:0003674//GO:0016829//GO:0000287//GO:0003824	metal ion binding//carbon-oxygen lyase activity, acting on phosphates//carbon-oxygen lyase activity//terpene synthase activity//binding//cation binding//ion binding//molecular_function//lyase activity//magnesium ion binding//catalytic activity	K14182 vetispiradiene synthase [EC:4.2.3.21] | (RefSeq) PVS2; putative vetispiradiene synthase 3	http://www.genome.jp/dbget-bin/www_bget?sot:102577472	--	putative vetispiradiene synthase 3 [Solanum tuberosum]>gi|4105135|gb|AAD02269.1| putative vetispiradiene synthase 4 [Solanum tuberosum]
11	Novel00662	693.479	274.054	1.3394	3.4999e-05	0.00076789	UP	GO:0007017//GO:0007018//GO:0008150//GO:0009987//GO:0006928	microtubule-based process//microtubule-based movement//biological_process//cellular process//movement of cell or subcellular component	--	--	GO:0005524//GO:0032553//GO:0008092//GO:0032550//GO:0008270//GO:0016787//GO:0032555//GO:0035639//GO:0043167//GO:0036094//GO:0016818//GO:0003674//GO:0015631//GO:0030554//GO:0003824//GO:1901363//GO:0097159//GO:0016462//GO:0043168//GO:0008017//GO:0032559//GO:0032549//GO:0016817//GO:0005488//GO:0003774//GO:1901265//GO:0046872//GO:0003777//GO:0097367//GO:0017076//GO:0001883//GO:0000166//GO:0001882//GO:…	ATP binding//ribonucleotide binding//cytoskeletal protein binding//purine ribonucleoside binding//zinc ion binding//hydrolase activity//purine ribonucleotide binding//purine ribonucleoside triphosphate binding//ion binding//small molecule binding//hydrolase activity, acting on acid anhydrides, in phosphorus-containing anhydrides//molecular_function//tubulin binding//adenyl nucleotide binding//cat…	K11498 centromeric protein E | (RefSeq) kinesin-related protein 11	http://www.genome.jp/dbget-bin/www_bget?sot:102583157	--	PREDICTED: centromere-associated protein E-like isoform X1 [Solanum tuberosum]
12	Novel00682	301.741	82.8932	1.864	2.1381e-06	6.8476e-05	UP	GO:0044267//GO:0036211//GO:0006468//GO:0044238//GO:0019538//GO:0044237//GO:0016310//GO:0032501//GO:0009875//GO:0022414//GO:0044703//GO:0007154//GO:0043170//GO:0051704//GO:0006464//GO:0043412//GO:0009856//GO:0008150//GO:0009987//GO:0008037//GO:0006796//GO:0048544//GO:0008152//GO:0006793//GO:0044706//GO:0071704//GO:0044260	cellular protein metabolic process//protein modification process//protein phosphorylation//primary metabolic process//protein metabolic process//cellular metabolic process//phosphorylation//multicellular organismal process//pollen-pistil interaction//reproductive process//multi-organism reproductive process//cell communication//macromolecule metabolic process//multi-organism process//cellular pro…	--	--	GO:0001883//GO:0000166//GO:0016772//GO:0001882//GO:0004672//GO:0004674//GO:0016773//GO:0043168//GO:0032549//GO:0032559//GO:0005488//GO:1901265//GO:0097367//GO:0017076//GO:0003824//GO:0030554//GO:1901363//GO:0016740//GO:0097159//GO:0005524//GO:0032553//GO:0016301//GO:0032550//GO:0032555//GO:0035639//GO:0043167//GO:0036094//GO:0003674	purine nucleoside binding//nucleotide binding//transferase activity, transferring phosphorus-containing groups//nucleoside binding//protein kinase activity//protein serine/threonine kinase activity//phosphotransferase activity, alcohol group as acceptor//anion binding//ribonucleoside binding//adenyl ribonucleotide binding//binding//nucleoside phosphate binding//carbohydrate derivative binding//pu…	no KO assigned | (RefSeq) G-type lectin S-receptor-like serine/threonine-protein kinase At4g27290	http://www.genome.jp/dbget-bin/www_bget?sot:102602120	--	PREDICTED: G-type lectin S-receptor-like serine/threonine-protein kinase At4g27290-like [Solanum tuberosum]
13	Novel00905	39.4516	2.77122	3.8315	0.00071576	0.0089446	UP	--	--	--	--	--	--	--	--	--	--
14	Novel00958	147.412	31.8724	2.2095	1.725e-05	0.00041816	UP	GO:0044281//GO:1901362//GO:0080090//GO:0051171//GO:0009987//GO:0006082//GO:0019438//GO:2000112//GO:1901564//GO:0008150//GO:0031326//GO:0006810//GO:0051234//GO:0006355//GO:0050789//GO:0031323//GO:0044249//GO:0009889//GO:0006725//GO:0097659//GO:0071704//GO:0006351//GO:0034645//GO:1901605//GO:0006520//GO:0044260//GO:1901576//GO:2001141//GO:0008152//GO:0051252//GO:0006575//GO:1903506//GO:0007155//GO:…	small molecule metabolic process//organic cyclic compound biosynthetic process//regulation of primary metabolic process//regulation of nitrogen compound metabolic process//cellular process//organic acid metabolic process//aromatic compound biosynthetic process//regulation of cellular macromolecule biosynthetic process//organonitrogen compound metabolic process//biological_process//regulation of c…	GO:0043226//GO:0044430//GO:0005856//GO:0016020//GO:0032991//GO:0005575//GO:0015629//GO:0031224//GO:0044464//GO:0005622//GO:0005623//GO:0043228//GO:0016459//GO:0043229//GO:0044446//GO:0044422//GO:0016021//GO:0044425//GO:0044424//GO:0043232	organelle//cytoskeletal part//cytoskeleton//membrane//protein-containing complex//cellular_component//actin cytoskeleton//intrinsic component of membrane//cell part//intracellular//cell//non-membrane-bounded organelle//myosin complex//intracellular organelle//intracellular organelle part//organelle part//integral component of membrane//membrane part//intracellular part//intracellular non-membrane…	GO:0097159//GO:0016462//GO:0030554//GO:0003824//GO:1901363//GO:0043167//GO:0003700//GO:0036094//GO:0016818//GO:0003674//GO:0004150//GO:0005524//GO:0032553//GO:0016829//GO:0032550//GO:0016787//GO:0032555//GO:0035639//GO:0017111//GO:0016830//GO:0005515//GO:0001883//GO:0000166//GO:0001882//GO:1901265//GO:0097367//GO:0017076//GO:0043168//GO:0032559//GO:0032549//GO:0016817//GO:0016832//GO:0005488//GO:…	organic cyclic compound binding//pyrophosphatase activity//adenyl nucleotide binding//catalytic activity//heterocyclic compound binding//ion binding//DNA-binding transcription factor activity//small molecule binding//hydrolase activity, acting on acid anhydrides, in phosphorus-containing anhydrides//molecular_function//dihydroneopterin aldolase activity//ATP binding//ribonucleotide binding//lyase…	K10357 myosin V | (RefSeq) myosin-11	http://www.genome.jp/dbget-bin/www_bget?sot:102601504	--	PREDICTED: myosin-11-like [Solanum tuberosum]
15	Novel01084	4604.14	545.136	3.0782	2.687e-06	8.4066e-05	UP	--	--	--	--	--	--	no KO assigned | (RefSeq) citrate-binding protein-like	http://www.genome.jp/dbget-bin/www_bget?sot:102594128	--	PREDICTED: citrate-binding protein-like [Solanum tuberosum]
16	Novel01106	15.3966	0.334037	5.5265	0.0062037	0.046386	UP	GO:0050896//GO:0006950//GO:0055114//GO:0006979//GO:0008150//GO:0008152	response to stimulus//response to stress//oxidation-reduction process//response to oxidative stress//biological_process//metabolic process	--	--	GO:0016209//GO:0020037//GO:0005488//GO:0097159//GO:1901363//GO:0016684//GO:0003824//GO:0016491//GO:0003674//GO:0046906//GO:0004601	antioxidant activity//heme binding//binding//organic cyclic compound binding//heterocyclic compound binding//oxidoreductase activity, acting on peroxide as acceptor//catalytic activity//oxidoreductase activity//molecular_function//tetrapyrrole binding//peroxidase activity	K00430 peroxidase [EC:1.11.1.7] | (RefSeq) lignin-forming anionic peroxidase-like	http://www.genome.jp/dbget-bin/www_bget?sot:102599828	--	PREDICTED: lignin-forming anionic peroxidase-like [Solanum tuberosum]
17	Novel01162	412.397	34.96	3.5603	1.4791e-18	5.5128e-16	UP	GO:0009987//GO:0043412//GO:0016567//GO:0008150//GO:0071704//GO:0044260//GO:0008152//GO:0032446//GO:0044238//GO:0036211//GO:0019538//GO:0070647//GO:0044267//GO:0043170//GO:0006464//GO:0044237	cellular process//macromolecule modification//protein ubiquitination//biological_process//organic substance metabolic process//cellular macromolecule metabolic process//metabolic process//protein modification by small protein conjugation//primary metabolic process//protein modification process//protein metabolic process//protein modification by small protein conjugation or removal//cellular prote…	--	--	GO:0003824//GO:0016740//GO:0043167//GO:0003674//GO:0008270//GO:0043169//GO:0046914//GO:0004842//GO:0046872//GO:0005488//GO:0019787	catalytic activity//transferase activity//ion binding//molecular_function//zinc ion binding//cation binding//transition metal ion binding//ubiquitin-protein transferase activity//metal ion binding//binding//ubiquitin-like protein transferase activity	no KO assigned | (RefSeq) E3 ubiquitin-protein ligase PUB23-like	http://www.genome.jp/dbget-bin/www_bget?sot:102590618	--	PREDICTED: E3 ubiquitin-protein ligase PUB24-like [Solanum tuberosum]
18	Novel01178	1531.2	597.267	1.3582	3.2909e-06	9.9721e-05	UP	GO:0008152//GO:0008150//GO:0055114	metabolic process//biological_process//oxidation-reduction process	GO:0044425//GO:0016021//GO:0031224//GO:0016020//GO:0005575	membrane part//integral component of membrane//intrinsic component of membrane//membrane//cellular_component	GO:0043168//GO:0004497//GO:0005488//GO:1901265//GO:0071949//GO:0048037//GO:0000166//GO:0016705//GO:0016709//GO:0043167//GO:0036094//GO:0003674//GO:0004506//GO:0003824//GO:1901363//GO:0016491//GO:0097159//GO:0050662//GO:0050660	anion binding//monooxygenase activity//binding//nucleoside phosphate binding//FAD binding//cofactor binding//nucleotide binding//oxidoreductase activity, acting on paired donors, with incorporation or reduction of molecular oxygen//oxidoreductase activity, acting on paired donors, with incorporation or reduction of molecular oxygen, NAD(P)H as one donor, and incorporation of one atom of oxygen//i…	no KO assigned | (RefSeq) FAD-dependent urate hydroxylase-like	http://www.genome.jp/dbget-bin/www_bget?sot:102589596	--	PREDICTED: zeaxanthin epoxidase, chloroplastic-like [Solanum tuberosum]
19	Novel01299	191.841	60.6859	1.6605	0.00015095	0.0025573	UP	GO:0009987//GO:0023052//GO:0050789//GO:0008150//GO:0007165//GO:0050896//GO:0050794//GO:0065007//GO:0007154//GO:0051716	cellular process//signaling//regulation of biological process//biological_process//signal transduction//response to stimulus//regulation of cellular process//biological regulation//cell communication//cellular response to stimulus	--	--	GO:0003674//GO:0005515//GO:0005488	molecular_function//protein binding//binding	no KO assigned | (RefSeq) protein PHLOEM PROTEIN 2-LIKE A8-like	http://www.genome.jp/dbget-bin/www_bget?sot:102592863	--	PREDICTED: protein PHLOEM PROTEIN 2-LIKE A6-like [Solanum tuberosum]
20	Novel01306	46.8629	4.68921	3.321	0.0027081	0.024954	UP	GO:0008150//GO:0009664//GO:0009987//GO:0071669//GO:0045229//GO:0071840//GO:0071555//GO:0071554//GO:0016043	biological_process//plant-type cell wall organization//cellular process//plant-type cell wall organization or biogenesis//external encapsulating structure organization//cellular component organization or biogenesis//cell wall organization//cell wall organization or biogenesis//cellular component organization	GO:0005856//GO:0044430//GO:0043226//GO:0005575//GO:0032991//GO:0043228//GO:0005623//GO:0045111//GO:0005622//GO:0044464//GO:0043232//GO:0044424//GO:0044422//GO:0043229//GO:0044446//GO:0005882	cytoskeleton//cytoskeletal part//organelle//cellular_component//protein-containing complex//non-membrane-bounded organelle//cell//intermediate filament cytoskeleton//intracellular//cell part//intracellular non-membrane-bounded organelle//intracellular part//organelle part//intracellular organelle//intracellular organelle part//intermediate filament	GO:0005198//GO:0003674//GO:0005199	structural molecule activity//molecular_function//structural constituent of cell wall	--	--	--	PREDICTED: uncharacterized protein C1235.01-like [Solanum tuberosum]
21	Novel01342	539.425	121.427	2.1513	0.00018077	0.0029572	UP	--	--	--	--	GO:0005515//GO:0005488//GO:0003674	protein binding//binding//molecular_function	no KO assigned | (RefSeq) probable LRR receptor-like serine/threonine-protein kinase At1g53430	http://www.genome.jp/dbget-bin/www_bget?sot:102599975	--	PREDICTED: probable LRR receptor-like serine/threonine-protein kinase At1g53430-like [Solanum tuberosum]
22	Novel01420	24.3352	0.908719	4.7431	0.0013299	0.014446	UP	--	--	--	--	GO:0003674//GO:0005488//GO:0005515	molecular_function//binding//protein binding	no KO assigned | (RefSeq) probable leucine-rich repeat receptor-like protein kinase At1g35710	http://www.genome.jp/dbget-bin/www_bget?sot:102586009	--	PREDICTED: probable leucine-rich repeat receptor-like protein kinase At1g35710-like [Solanum tuberosum]
23	Novel01665	3406.45	1636.96	1.0573	0.0022832	0.021932	UP	GO:0051704//GO:0032507//GO:0006464//GO:0016310//GO:0043170//GO:0008104//GO:0044237//GO:0019538//GO:0007010//GO:0071840//GO:0051179//GO:0006996//GO:0042710//GO:0016043//GO:0036211//GO:0044764//GO:0007016//GO:0006468//GO:0044238//GO:0065007//GO:0045185//GO:0070727//GO:0044267//GO:0051651//GO:0051235//GO:0065008//GO:0033036//GO:0044260//GO:0071704//GO:0034613//GO:0006793//GO:0008152//GO:0051641//GO:…	multi-organism process//maintenance of protein location in cell//cellular protein modification process//phosphorylation//macromolecule metabolic process//protein localization//cellular metabolic process//protein metabolic process//cytoskeleton organization//cellular component organization or biogenesis//localization//organelle organization//biofilm formation//cellular component organization//prot…	GO:0044425//GO:0044464//GO:0016010//GO:0005623//GO:0005575//GO:0005886//GO:0016020//GO:0032991//GO:0098797//GO:0071944//GO:0044459//GO:0098796	membrane part//cell part//dystrophin-associated glycoprotein complex//cell//cellular_component//plasma membrane//membrane//protein-containing complex//plasma membrane protein complex//cell periphery//plasma membrane part//membrane protein complex	GO:0017076//GO:1901265//GO:0097367//GO:0032559//GO:0032549//GO:0005488//GO:0043168//GO:0016773//GO:0004674//GO:0016772//GO:0001882//GO:0004672//GO:0001883//GO:0000166//GO:0036094//GO:0016779//GO:0003674//GO:0043167//GO:0032550//GO:0032555//GO:0035639//GO:0005524//GO:0032553//GO:0016301//GO:0097159//GO:0016740//GO:0030554//GO:0003824//GO:1901363	purine nucleotide binding//nucleoside phosphate binding//carbohydrate derivative binding//adenyl ribonucleotide binding//ribonucleoside binding//binding//anion binding//phosphotransferase activity, alcohol group as acceptor//protein serine/threonine kinase activity//transferase activity, transferring phosphorus-containing groups//nucleoside binding//protein kinase activity//purine nucleoside bind…	--	--	--	putative receptor-like serine-threonine protein kinase [Solanum tuberosum]
24	Novel01704	182.353	11.2746	4.0156	0.0017205	0.017708	UP	GO:0031348//GO:0008150//GO:0050688//GO:0050789//GO:0002682//GO:0032102//GO:0051817//GO:0002697//GO:0052564//GO:0050687//GO:0051807//GO:0048519//GO:0009607//GO:0048585//GO:0052173//GO:0051832//GO:0002376//GO:0032101//GO:0009987//GO:0043901//GO:0043207//GO:0051805//GO:0065008//GO:0048583//GO:0002832//GO:0050690//GO:0044003//GO:0044413//GO:0051707//GO:0030682//GO:0065007//GO:0051834//GO:0052200//GO:…	negative regulation of defense response//biological_process//regulation of defense response to virus//regulation of biological process//regulation of immune system process//negative regulation of response to external stimulus//modification of morphology or physiology of other organism involved in symbiotic interaction//regulation of immune effector process//response to immune response of other or…	--	--	GO:0016788//GO:0003824//GO:0004518//GO:0016787//GO:0003674//GO:0008408//GO:0004527	hydrolase activity, acting on ester bonds//catalytic activity//nuclease activity//hydrolase activity//molecular_function//3'-5' exonuclease activity//exonuclease activity	K02320 DNA polymerase alpha subunit A [EC:2.7.7.7] | (RefSeq) DNA polymerase alpha catalytic subunit	http://www.genome.jp/dbget-bin/www_bget?sot:102587331	--	PREDICTED: DNA polymerase alpha catalytic subunit-like [Solanum tuberosum]
25	Novel01746	866.469	204.94	2.0799	5.2477e-06	0.00015002	UP	GO:0044237//GO:0006464//GO:0043170//GO:0016310//GO:0044267//GO:0019538//GO:0044238//GO:0006468//GO:0036211//GO:0006793//GO:0008152//GO:0044260//GO:0071704//GO:0008150//GO:0043412//GO:0006796//GO:0009987	cellular metabolic process//cellular protein modification process//macromolecule metabolic process//phosphorylation//cellular protein metabolic process//protein metabolic process//primary metabolic process//protein phosphorylation//protein modification process//phosphorus metabolic process//metabolic process//cellular macromolecule metabolic process//organic substance metabolic process//biologica…	--	--	GO:0005488//GO:0032549//GO:0032559//GO:0043168//GO:0017076//GO:0097367//GO:1901265//GO:0004672//GO:0001882//GO:0016772//GO:0000166//GO:0001883//GO:0016773//GO:0035639//GO:0032555//GO:0032550//GO:0016301//GO:0032553//GO:0005524//GO:0003674//GO:0036094//GO:0043167//GO:0016740//GO:1901363//GO:0003824//GO:0030554//GO:0097159	binding//ribonucleoside binding//adenyl ribonucleotide binding//anion binding//purine nucleotide binding//carbohydrate derivative binding//nucleoside phosphate binding//protein kinase activity//nucleoside binding//transferase activity, transferring phosphorus-containing groups//nucleotide binding//purine nucleoside binding//phosphotransferase activity, alcohol group as acceptor//purine ribonucleo…	K10775 phenylalanine ammonia-lyase [EC:4.3.1.24] | (RefSeq) phenylalanine ammonia-lyase-like	http://www.genome.jp/dbget-bin/www_bget?sot:102585357	--	PREDICTED: phenylalanine ammonia-lyase-like [Solanum tuberosum]
26	Novel01785	130.944	42.1445	1.6355	0.0013417	0.014553	UP	GO:0008152//GO:0008150//GO:0055114	metabolic process//biological_process//oxidation-reduction process	--	--	GO:0004616//GO:0003674//GO:0036094//GO:1901363//GO:0003824//GO:0016491//GO:0050662//GO:0097159//GO:0005488//GO:0051287//GO:0016614//GO:1901265//GO:0048037//GO:0016616//GO:0000166	phosphogluconate dehydrogenase (decarboxylating) activity//molecular_function//small molecule binding//heterocyclic compound binding//catalytic activity//oxidoreductase activity//coenzyme binding//organic cyclic compound binding//binding//NAD binding//oxidoreductase activity, acting on CH-OH group of donors//nucleoside phosphate binding//cofactor binding//oxidoreductase activity, acting on the CH…	K00083 cinnamyl-alcohol dehydrogenase [EC:1.1.1.195] | (RefSeq) probable cinnamyl alcohol dehydrogenase 9	http://www.genome.jp/dbget-bin/www_bget?sot:102584649	--	PREDICTED: probable cinnamyl alcohol dehydrogenase 9-like [Solanum tuberosum]
27	Novel02002	674.959	337.026	1.0019	0.0012348	0.013687	UP	GO:0008150//GO:0055114//GO:0008152	biological_process//oxidation-reduction process//metabolic process	--	--	GO:0003824//GO:1901363//GO:0016491//GO:0097159//GO:0046906//GO:0005506//GO:0043167//GO:0003674//GO:0020037//GO:0016705//GO:0043169//GO:0046914//GO:0005488//GO:0046872	catalytic activity//heterocyclic compound binding//oxidoreductase activity//organic cyclic compound binding//tetrapyrrole binding//iron ion binding//ion binding//molecular_function//heme binding//oxidoreductase activity, acting on paired donors, with incorporation or reduction of molecular oxygen//cation binding//transition metal ion binding//binding//metal ion binding	no KO assigned | (RefSeq) cytochrome P450 71A3-like	http://www.genome.jp/dbget-bin/www_bget?sot:102590625	--	PREDICTED: cytochrome P450 71A2-like [Solanum tuberosum]
28	Novel02020	94.4313	31.8019	1.5702	0.0050496	0.039863	UP	--	--	--	--	--	--	--	--	--	--
29	Novel02072	720.574	336.843	1.0971	0.00026552	0.0040188	UP	--	--	--	--	--	--	no KO assigned | (RefSeq) pentatricopeptide repeat-containing protein At1g08610	http://www.genome.jp/dbget-bin/www_bget?sot:102585775	--	PREDICTED: pentatricopeptide repeat-containing protein At1g08610-like isoform X1 [Solanum tuberosum]>gi|565391405|ref|XP_006361413.1| PREDICTED: pentatricopeptide repeat-containing protein At1g08610-like isoform X2 [Solanum tuberosum]>gi|565391407|ref|XP_006361414.1| PREDICTED: pentatricopeptide repeat-containing protein At1g08610-like isoform X3 [Solanum tuberosum]
30	Novel02120	120.445	40.0097	1.59	0.001649	0.017096	UP	GO:0044260//GO:1901576//GO:0006725//GO:0071704//GO:0008152//GO:0042440//GO:0046148//GO:0055114//GO:0008610//GO:0006720//GO:0009987//GO:0006396//GO:0008150//GO:0034660//GO:0008033//GO:0044249//GO:0016114//GO:0006721//GO:0016116//GO:0006399//GO:0044255//GO:0016117//GO:0043170//GO:1901360//GO:0006139//GO:0016108//GO:0044237//GO:0034470//GO:0006807//GO:0009058//GO:0010467//GO:0090304//GO:0008299//GO:…	cellular macromolecule metabolic process//organic substance biosynthetic process//cellular aromatic compound metabolic process//organic substance metabolic process//metabolic process//pigment metabolic process//pigment biosynthetic process//oxidation-reduction process//lipid biosynthetic process//isoprenoid metabolic process//cellular process//RNA processing//biological_process//ncRNA metabolic p…	--	--	GO:0003674//GO:0036094//GO:0043167//GO:0097159//GO:0050660//GO:0050662//GO:0016491//GO:0003824//GO:1901363//GO:0048037//GO:1901265//GO:0071949//GO:0005488//GO:0043168//GO:0016705//GO:0000166	molecular_function//small molecule binding//ion binding//organic cyclic compound binding//flavin adenine dinucleotide binding//coenzyme binding//oxidoreductase activity//catalytic activity//heterocyclic compound binding//cofactor binding//nucleoside phosphate binding//FAD binding//binding//anion binding//oxidoreductase activity, acting on paired donors, with incorporation or reduction of molecula…	no KO assigned | (RefSeq) putative oxidoreductase YetM	http://www.genome.jp/dbget-bin/www_bget?sot:102583135	--	PREDICTED: zeaxanthin epoxidase, chloroplastic [Solanum lycopersicum]
31	Novel02208	94.562	13.3738	2.8219	0.0068416	0.049803	UP	GO:0009987//GO:0032502//GO:0030154//GO:0023052//GO:0050789//GO:0008150//GO:0007166//GO:0048869//GO:0007219//GO:0007275//GO:0007165//GO:0050896//GO:0050794//GO:0065007//GO:0007154//GO:0032501//GO:0051716	cellular process//developmental process//cell differentiation//signaling//regulation of biological process//biological_process//cell surface receptor signaling pathway//cellular developmental process//Notch signaling pathway//multicellular organism development//signal transduction//response to stimulus//regulation of cellular process//biological regulation//cell communication//multicellular organ…	GO:0016020//GO:0005575//GO:0031224//GO:0016021//GO:0044425	membrane//cellular_component//intrinsic component of membrane//integral component of membrane//membrane part	--	--	no KO assigned | (RefSeq) uncharacterized LOC102585519	http://www.genome.jp/dbget-bin/www_bget?sot:102585519	--	PREDICTED: uncharacterized protein LOC102585519 [Solanum tuberosum]
32	Novel02244	561.196	244.353	1.1995	0.00023344	0.0036139	UP	GO:0006807//GO:0006310//GO:0090304//GO:0046483//GO:0044238//GO:0006259//GO:0034641//GO:0050896//GO:0043170//GO:1901360//GO:0006139//GO:0006950//GO:0006974//GO:0044237//GO:0051716//GO:0033554//GO:0009987//GO:0006281//GO:0008150//GO:0044260//GO:0006725//GO:0071704//GO:0008152	nitrogen compound metabolic process//DNA recombination//nucleic acid metabolic process//heterocycle metabolic process//primary metabolic process//DNA metabolic process//cellular nitrogen compound metabolic process//response to stimulus//macromolecule metabolic process//organic cyclic compound metabolic process//nucleobase-containing compound metabolic process//response to stress//cellular respons…	--	--	GO:0017111//GO:0005515//GO:0003678//GO:0001882//GO:0001883//GO:0000166//GO:0017076//GO:1901265//GO:0097367//GO:0032559//GO:0032549//GO:0016817//GO:0005488//GO:0043168//GO:0097159//GO:0016462//GO:0004386//GO:0009378//GO:0030554//GO:0003824//GO:1901363//GO:0003674//GO:0036094//GO:0016818//GO:0043167//GO:0032550//GO:0016787//GO:0043531//GO:0035639//GO:0032555//GO:0032553//GO:0005524	nucleoside-triphosphatase activity//protein binding//DNA helicase activity//nucleoside binding//purine nucleoside binding//nucleotide binding//purine nucleotide binding//nucleoside phosphate binding//carbohydrate derivative binding//adenyl ribonucleotide binding//ribonucleoside binding//hydrolase activity, acting on acid anhydrides//binding//anion binding//organic cyclic compound binding//pyropho…	no KO assigned | (RefSeq) putative late blight resistance protein homolog R1A-3	http://www.genome.jp/dbget-bin/www_bget?sot:102579429	--	PREDICTED: putative late blight resistance protein homolog R1B-23-like isoform X1 [Solanum tuberosum]
33	Novel02277	1164.58	424.724	1.4552	0.0041574	0.03453	UP	GO:0071704//GO:0006508//GO:0008152//GO:0008150//GO:0043170//GO:0019538//GO:0044238	organic substance metabolic process//proteolysis//metabolic process//biological_process//macromolecule metabolic process//protein metabolic process//primary metabolic process	--	--	GO:0003674//GO:0004185//GO:0008236//GO:0016787//GO:0070011//GO:0004180//GO:0017171//GO:0003824//GO:0008233//GO:0008238//GO:0070008	molecular_function//serine-type carboxypeptidase activity//serine-type peptidase activity//hydrolase activity//peptidase activity, acting on L-amino acid peptides//carboxypeptidase activity//serine hydrolase activity//catalytic activity//peptidase activity//exopeptidase activity//serine-type exopeptidase activity	K16296 serine carboxypeptidase-like clade I [EC:3.4.16.-] | (RefSeq) serine carboxypeptidase-like 17	http://www.genome.jp/dbget-bin/www_bget?sot:102604189	--	PREDICTED: serine carboxypeptidase-like 18-like isoform X1 [Solanum tuberosum]
34	Novel02327	129.79	16.1296	3.0084	0.00028257	0.0042064	UP	--	--	--	--	--	--	no KO assigned | (RefSeq) uncharacterized LOC102587765	http://www.genome.jp/dbget-bin/www_bget?sot:102587765	--	PREDICTED: uncharacterized protein LOC102587765 [Solanum tuberosum]
35	Novel02345	6650.78	3033.76	1.1324	9.1195e-05	0.0016963	UP	--	--	--	--	--	--	no KO assigned | (RefSeq) uncharacterized protein sll1770	http://www.genome.jp/dbget-bin/www_bget?sot:102587186	--	PREDICTED: uncharacterized aarF domain-containing protein kinase At1g79600, chloroplastic-like isoform X1 [Solanum tuberosum]>gi|565376435|ref|XP_006354711.1| PREDICTED: uncharacterized aarF domain-containing protein kinase At1g79600, chloroplastic-like isoform X2 [Solanum tuberosum]
36	Novel02389	38.6662	2.01139	4.2648	0.00013515	0.0023374	UP	--	--	--	--	--	--	no KO assigned | (RefSeq) patatin-like protein 2	http://www.genome.jp/dbget-bin/www_bget?sot:102578561	--	PREDICTED: patatin-3-Kuras 1-like [Solanum tuberosum]
37	Novel02390	27.386	1.14773	4.5766	0.00077402	0.0095565	UP	GO:0071704//GO:0008152//GO:0008150//GO:0044238//GO:0006629	organic substance metabolic process//metabolic process//biological_process//primary metabolic process//lipid metabolic process	--	--	--	--	no KO assigned | (RefSeq) patatin-like protein 2	http://www.genome.jp/dbget-bin/www_bget?sot:102578561	--	PREDICTED: patatin-3-Kuras 1-like [Solanum tuberosum]
38	Novel02431	88.3665	14.8921	2.569	0.0003475	0.004967	UP	GO:0055085//GO:0042493//GO:0050896//GO:0051179//GO:0042221//GO:0008150//GO:0051234//GO:0006810//GO:0009987//GO:0015893//GO:0006855	transmembrane transport//response to drug//response to stimulus//localization//response to chemical//biological_process//establishment of localization//transport//cellular process//drug transport//drug transmembrane transport	GO:0005575//GO:0016020	cellular_component//membrane	GO:0022804//GO:0005215//GO:0015297//GO:0003674//GO:0015291//GO:0022857//GO:0015238	active transmembrane transporter activity//transporter activity//antiporter activity//molecular_function//secondary active transmembrane transporter activity//transmembrane transporter activity//drug transmembrane transporter activity	K03327 multidrug resistance protein, MATE family | (RefSeq) protein DETOXIFICATION 29-like	http://www.genome.jp/dbget-bin/www_bget?sot:102583444	--	PREDICTED: protein TRANSPARENT TESTA 12-like isoform X2 [Solanum tuberosum]
39	Novel02575	1884.12	492.966	1.9343	0.0060111	0.045387	UP	GO:0051179//GO:0006811//GO:0055085//GO:0009987//GO:0006810//GO:0051234//GO:0008150	localization//ion transport//transmembrane transport//cellular process//transport//establishment of localization//biological_process	GO:0016020//GO:0005575	membrane//cellular_component	GO:0005215//GO:0022838//GO:0015075//GO:0022803//GO:0022857//GO:0005216//GO:0003674//GO:0015267	transporter activity//substrate-specific channel activity//ion transmembrane transporter activity//passive transmembrane transporter activity//transmembrane transporter activity//ion channel activity//molecular_function//channel activity	--	--	--	PREDICTED: cyclic nucleotide-gated ion channel 1-like isoform X1 [Solanum tuberosum]
40	Novel02685	1834.69	805.172	1.1882	1.7295e-05	0.00041892	UP	--	--	--	--	GO:0001882//GO:0001883//GO:0000166//GO:0017076//GO:1901265//GO:0097367//GO:0032549//GO:0032559//GO:0005488//GO:0043168//GO:0097159//GO:0030554//GO:1901363//GO:0036094//GO:0003674//GO:0043167//GO:0032550//GO:0032555//GO:0035639//GO:0005524//GO:0032553	nucleoside binding//purine nucleoside binding//nucleotide binding//purine nucleotide binding//nucleoside phosphate binding//carbohydrate derivative binding//ribonucleoside binding//adenyl ribonucleotide binding//binding//anion binding//organic cyclic compound binding//adenyl nucleotide binding//heterocyclic compound binding//small molecule binding//molecular_function//ion binding//purine ribonucl…	K00938 phosphomevalonate kinase [EC:2.7.4.2] | (RefSeq) probable phosphomevalonate kinase	http://www.genome.jp/dbget-bin/www_bget?sot:102581852	--	PREDICTED: phosphomevalonate kinase-like [Solanum tuberosum]
41	Novel02772	33.266	1.81744	4.1941	0.00044857	0.006113	UP	--	--	--	--	--	--	--	--	--	--
42	Novel02814	443.117	57.4591	2.9471	2.1305e-11	2.4623e-09	UP	--	--	GO:0016020//GO:0005575	membrane//cellular_component	GO:0015075//GO:0008066//GO:0015276//GO:0060089//GO:0022838//GO:0005215//GO:0004871//GO:0004888//GO:0005231//GO:0022857//GO:0022803//GO:0005230//GO:0005234//GO:0015267//GO:0004970//GO:0038023//GO:0022834//GO:0005216//GO:0022836//GO:0003674	ion transmembrane transporter activity//glutamate receptor activity//ligand-gated ion channel activity//molecular transducer activity//substrate-specific channel activity//transporter activity//obsolete signal transducer activity//transmembrane signaling receptor activity//excitatory extracellular ligand-gated ion channel activity//transmembrane transporter activity//passive transmembrane transpo…	K05387 glutamate receptor, ionotropic, plant | (RefSeq) glutamate receptor 2.8-like	http://www.genome.jp/dbget-bin/www_bget?sot:102604448	--	PREDICTED: glutamate receptor 2.8-like [Solanum lycopersicum]>gi|357933565|dbj|BAL15049.1| glutamate receptor 2.2 [Solanum lycopersicum]
43	Novel02894	56.7724	9.06532	2.6468	0.0015182	0.016107	UP	GO:0019222//GO:0043170//GO:0018022//GO:0019219//GO:0009059//GO:0006464//GO:0043414//GO:0018193//GO:0032259//GO:0044237//GO:0006479//GO:0008213//GO:1901360//GO:0006139//GO:0044271//GO:0016571//GO:0090304//GO:0016043//GO:0034968//GO:0046483//GO:0006325//GO:0044238//GO:0036211//GO:0006807//GO:0009058//GO:0019538//GO:0006996//GO:0010467//GO:0071840//GO:0060255//GO:0010556//GO:0034654//GO:0044267//GO:…	regulation of metabolic process//macromolecule metabolic process//peptidyl-lysine methylation//regulation of nucleobase-containing compound metabolic process//macromolecule biosynthetic process//cellular protein modification process//macromolecule methylation//peptidyl-amino acid modification//methylation//cellular metabolic process//protein methylation//protein alkylation//organic cyclic compoun…	GO:0005694//GO:0043229//GO:0044424//GO:0043232//GO:0044464//GO:0005622//GO:0005623//GO:0043228//GO:0005575//GO:0043226	chromosome//intracellular organelle//intracellular part//intracellular non-membrane-bounded organelle//cell part//intracellular//cell//non-membrane-bounded organelle//cellular_component//organelle	GO:0008276//GO:0042054//GO:0016278//GO:0008757//GO:0008170//GO:0003674//GO:0008168//GO:0016279//GO:0016741//GO:0003824//GO:0016740//GO:0018024	protein methyltransferase activity//histone methyltransferase activity//lysine N-methyltransferase activity//S-adenosylmethionine-dependent methyltransferase activity//N-methyltransferase activity//molecular_function//methyltransferase activity//protein-lysine N-methyltransferase activity//transferase activity, transferring one-carbon groups//catalytic activity//transferase activity//histone-lysi…	no KO assigned | (RefSeq) uncharacterized LOC102597177	http://www.genome.jp/dbget-bin/www_bget?sot:102597177	--	PREDICTED: uncharacterized protein LOC104239872 [Nicotiana sylvestris]>gi|698493237|ref|XP_009792903.1| PREDICTED: uncharacterized protein LOC104239872 [Nicotiana sylvestris]
44	Novel02934	2180.33	349.523	2.6411	0.0001539	0.0025969	UP	GO:0032774//GO:0010468//GO:0065007//GO:0016070//GO:0034641//GO:0060255//GO:0010556//GO:0034654//GO:0050794//GO:0018130//GO:0006807//GO:0009058//GO:0010467//GO:0090304//GO:0046483//GO:0044238//GO:1901360//GO:0006139//GO:0044271//GO:0044237//GO:0019219//GO:0009059//GO:0019222//GO:0043170//GO:0008150//GO:0031326//GO:0006355//GO:2000112//GO:0009889//GO:0050789//GO:0031323//GO:0044249//GO:0019438//GO:…	RNA biosynthetic process//regulation of gene expression//biological regulation//RNA metabolic process//cellular nitrogen compound metabolic process//regulation of macromolecule metabolic process//regulation of macromolecule biosynthetic process//nucleobase-containing compound biosynthetic process//regulation of cellular process//heterocycle biosynthetic process//nitrogen compound metabolic proces…	GO:0031224//GO:0044425//GO:0016021//GO:0005575//GO:0016020	intrinsic component of membrane//membrane part//integral component of membrane//cellular_component//membrane	GO:0003674//GO:0003700	molecular_function//DNA-binding transcription factor activity	no KO assigned | (RefSeq) cytochrome b561 and DOMON domain-containing protein At4g17280-like	http://www.genome.jp/dbget-bin/www_bget?sot:102599996	--	PREDICTED: auxin-induced in root cultures protein 12-like [Solanum tuberosum]
45	Novel03026	115.42	33.6179	1.7796	0.00084876	0.010296	UP	--	--	--	--	--	--	--	--	--	--
46	Novel03157	455.976	187.186	1.2845	0.00012752	0.0022286	UP	GO:0006661//GO:0008152//GO:1901137//GO:0006793//GO:0016255//GO:0071704//GO:0034645//GO:0009247//GO:0006506//GO:0006650//GO:0006505//GO:0044260//GO:1901576//GO:0043412//GO:0046474//GO:0044249//GO:0006664//GO:0008150//GO:0006643//GO:0009987//GO:0006796//GO:0019637//GO:0008610//GO:0044237//GO:0006497//GO:0008654//GO:0043170//GO:0044255//GO:0045017//GO:0006464//GO:0006644//GO:0009059//GO:0044267//GO:…	phosphatidylinositol biosynthetic process//metabolic process//carbohydrate derivative biosynthetic process//phosphorus metabolic process//attachment of GPI anchor to protein//organic substance metabolic process//cellular macromolecule biosynthetic process//glycolipid biosynthetic process//GPI anchor biosynthetic process//glycerophospholipid metabolic process//GPI anchor metabolic process//cellula…	GO:0005737//GO:1902494//GO:0005789//GO:0030176//GO:0098588//GO:0032991//GO:0043227//GO:0016020//GO:0005575//GO:0043231//GO:0098796//GO:0005783//GO:0043226//GO:0031301//GO:0042175//GO:0031227//GO:0044424//GO:0044425//GO:0031090//GO:0044422//GO:0016021//GO:0043229//GO:0044446//GO:0005623//GO:0044444//GO:0044432//GO:0042765//GO:0044464//GO:0031224//GO:0012505//GO:0031300//GO:0005622	cytoplasm//catalytic complex//endoplasmic reticulum membrane//integral component of endoplasmic reticulum membrane//bounding membrane of organelle//protein-containing complex//membrane-bounded organelle//membrane//cellular_component//intracellular membrane-bounded organelle//membrane protein complex//endoplasmic reticulum//organelle//integral component of organelle membrane//nuclear outer membran…	GO:0008270//GO:0043167//GO:0003674//GO:0005488//GO:0046872//GO:0043169//GO:0005515//GO:0046914	zinc ion binding//ion binding//molecular_function//binding//metal ion binding//cation binding//protein binding//transition metal ion binding	no KO assigned | (RefSeq) ankyrin repeat-containing protein At3g12360-like	http://www.genome.jp/dbget-bin/www_bget?sot:102604862	--	PREDICTED: ankyrin repeat-containing protein At3g12360-like [Solanum tuberosum]
47	Novel03174	31.7028	1.76911	4.1635	0.0030747	0.027482	UP	--	--	--	--	--	--	K13459 disease resistance protein RPS2 | (RefSeq) probable disease resistance protein At4g27220	http://www.genome.jp/dbget-bin/www_bget?sot:102599763	--	PREDICTED: probable disease resistance protein At4g27220-like [Solanum tuberosum]
48	Novel03217	191.527	66.9551	1.5163	0.00056822	0.0074245	UP	--	--	--	--	--	--	--	--	--	--
49	Novel03219	710.407	333.642	1.0903	0.00035904	0.0051076	UP	--	--	--	--	GO:0008081//GO:0004620//GO:0003824//GO:0016298//GO:0016788//GO:0003674//GO:0016787//GO:0050290//GO:0042578	phosphoric diester hydrolase activity//phospholipase activity//catalytic activity//lipase activity//hydrolase activity, acting on ester bonds//molecular_function//hydrolase activity//sphingomyelin phosphodiesterase D activity//phosphoric ester hydrolase activity	no KO assigned | (RefSeq) uncharacterized LOC102588056	http://www.genome.jp/dbget-bin/www_bget?sot:102588056	--	PREDICTED: uncharacterized protein LOC102588056 [Solanum tuberosum]
50	Novel03223	464.31	159.708	1.5396	0.00057876	0.0075457	UP	--	--	--	--	--	--	no KO assigned | (RefSeq) subtilisin-like protease SBT1.2	http://www.genome.jp/dbget-bin/www_bget?sot:102589706	--	PREDICTED: subtilisin-like protease SDD1-like [Solanum tuberosum]
51	Novel03243	43.5074	6.49195	2.7445	0.0026658	0.02467	UP	--	--	--	--	GO:0003674//GO:0016787//GO:0003824	molecular_function//hydrolase activity//catalytic activity	K19882 O-palmitoleoyl-L-serine hydrolase [EC:3.1.1.98] | (RefSeq) pectin acetylesterase 8-like	http://www.genome.jp/dbget-bin/www_bget?sot:102598683	--	PREDICTED: uncharacterized protein LOC101248898 [Solanum lycopersicum]
52	Novel03330	1483.88	298.68	2.3127	0.0025376	0.023788	UP	GO:0044237//GO:0019752//GO:0009058//GO:0043436//GO:0008152//GO:0071704//GO:0008150//GO:0006082//GO:0009987//GO:0044281	cellular metabolic process//carboxylic acid metabolic process//biosynthetic process//oxoacid metabolic process//metabolic process//organic substance metabolic process//biological_process//organic acid metabolic process//cellular process//small molecule metabolic process	--	--	GO:0005488//GO:0043168//GO:0048037//GO:0016830//GO:0016831//GO:0016829//GO:0003674//GO:0030170//GO:0043167//GO:1901363//GO:0003824//GO:0097159	binding//anion binding//cofactor binding//carbon-carbon lyase activity//carboxy-lyase activity//lyase activity//molecular_function//pyridoxal phosphate binding//ion binding//heterocyclic compound binding//catalytic activity//organic cyclic compound binding	K01590 histidine decarboxylase [EC:4.1.1.22] | (RefSeq) histidine decarboxylase-like	http://www.genome.jp/dbget-bin/www_bget?sot:102581954	--	PREDICTED: histidine decarboxylase-like [Solanum tuberosum]
53	Novel03337	148.398	36.6889	2.0161	7.3795e-05	0.0014233	UP	--	--	--	--	GO:0032549//GO:0032559//GO:0005488//GO:0043168//GO:0017076//GO:1901265//GO:0097367//GO:0001882//GO:0001883//GO:0000166//GO:0032550//GO:0043531//GO:0032555//GO:0032553//GO:0003674//GO:0036094//GO:0043167//GO:0030554//GO:1901363//GO:0097159	ribonucleoside binding//adenyl ribonucleotide binding//binding//anion binding//purine nucleotide binding//nucleoside phosphate binding//carbohydrate derivative binding//nucleoside binding//purine nucleoside binding//nucleotide binding//purine ribonucleoside binding//ADP binding//purine ribonucleotide binding//ribonucleotide binding//molecular_function//small molecule binding//ion binding//adenyl …	no KO assigned | (RefSeq) putative late blight resistance protein homolog R1A-10	http://www.genome.jp/dbget-bin/www_bget?sot:102584970	--	PREDICTED: putative late blight resistance protein homolog R1A-10 [Solanum lycopersicum]
54	Novel03396	1676.06	641.215	1.3862	1.0767e-06	3.8064e-05	UP	GO:0071704//GO:0044260//GO:0008152//GO:0006793//GO:0009987//GO:0006796//GO:0043412//GO:0008150//GO:0043170//GO:0016310//GO:0006464//GO:0044237//GO:0044238//GO:0006468//GO:0036211//GO:0019538//GO:0044267	organic substance metabolic process//cellular macromolecule metabolic process//metabolic process//phosphorus metabolic process//cellular process//phosphate-containing compound metabolic process//macromolecule modification//biological_process//macromolecule metabolic process//phosphorylation//cellular protein modification process//cellular metabolic process//primary metabolic process//protein phos…	--	--	GO:0043167//GO:0003674//GO:0036094//GO:0016301//GO:0032553//GO:0005524//GO:0035639//GO:0032555//GO:0032550//GO:0097159//GO:1901363//GO:0030554//GO:0003824//GO:0016740//GO:0097367//GO:1901265//GO:0017076//GO:0004715//GO:0043168//GO:0005488//GO:0032559//GO:0032549//GO:0016773//GO:0004713//GO:0000166//GO:0001883//GO:0004672//GO:0001882//GO:0016772	ion binding//molecular_function//small molecule binding//kinase activity//ribonucleotide binding//ATP binding//purine ribonucleoside triphosphate binding//purine ribonucleotide binding//purine ribonucleoside binding//organic cyclic compound binding//heterocyclic compound binding//adenyl nucleotide binding//catalytic activity//transferase activity//carbohydrate derivative binding//nucleoside phosp…	K14638 solute carrier family 15 (peptide/histidine transporter), member 3/4 | (RefSeq) protein NRT1/ PTR FAMILY 2.3-like	http://www.genome.jp/dbget-bin/www_bget?sot:102582054	--	PREDICTED: probable nitrate excretion transporter 3-like [Solanum tuberosum]
55	Novel03472	28.2999	0.955415	4.8885	0.00098084	0.011505	UP	--	--	--	--	--	--	no KO assigned | (RefSeq) uncharacterized LOC102603318	http://www.genome.jp/dbget-bin/www_bget?sot:102603318	--	PREDICTED: uncharacterized protein LOC102603318 [Solanum tuberosum]
56	Novel03488	641.357	16.0631	5.3193	0.0037147	0.031773	UP	GO:0006950//GO:0009611//GO:0050896//GO:0008150	response to stress//response to wounding//response to stimulus//biological_process	--	--	GO:0004857//GO:0098772//GO:0030414//GO:0061135//GO:0003674//GO:0061134//GO:0004866//GO:0030234//GO:0004867	enzyme inhibitor activity//molecular function regulator//peptidase inhibitor activity//endopeptidase regulator activity//molecular_function//peptidase regulator activity//endopeptidase inhibitor activity//enzyme regulator activity//serine-type endopeptidase inhibitor activity	no KO assigned | (RefSeq) PPI3B2; proteinase inhibitor 1 PPI3B2	http://www.genome.jp/dbget-bin/www_bget?sot:102577486	--	PREDICTED: proteinase inhibitor 1 PPI2C1A [Solanum tuberosum]
57	Novel03491	30.2512	1.4834	4.35	0.0010923	0.012455	UP	GO:0006950//GO:0050896//GO:0009611//GO:0008150	response to stress//response to stimulus//response to wounding//biological_process	--	--	GO:0098772//GO:0030414//GO:0004857//GO:0061135//GO:0004866//GO:0030234//GO:0061134//GO:0003674//GO:0004867	molecular function regulator//peptidase inhibitor activity//enzyme inhibitor activity//endopeptidase regulator activity//endopeptidase inhibitor activity//enzyme regulator activity//peptidase regulator activity//molecular_function//serine-type endopeptidase inhibitor activity	no KO assigned | (RefSeq) proteinase inhibitor I precursor	http://www.genome.jp/dbget-bin/www_bget?sot:102577841	--	PREDICTED: proteinase inhibitor I-B-like [Solanum lycopersicum]
58	Novel03493	13.4197	0	Inf	0.0055921	0.043052	UP	GO:0050896//GO:0009611//GO:0006950//GO:0008150	response to stimulus//response to wounding//response to stress//biological_process	--	--	GO:0061135//GO:0098772//GO:0030414//GO:0004857//GO:0004867//GO:0004866//GO:0030234//GO:0003674//GO:0061134	endopeptidase regulator activity//molecular function regulator//peptidase inhibitor activity//enzyme inhibitor activity//serine-type endopeptidase inhibitor activity//endopeptidase inhibitor activity//enzyme regulator activity//molecular_function//peptidase regulator activity	no KO assigned | (RefSeq) wound-induced proteinase inhibitor 1-like	http://www.genome.jp/dbget-bin/www_bget?sot:102605542	--	PREDICTED: wound-induced proteinase inhibitor 1-like [Solanum tuberosum]
59	Novel03511	434278	212154	1.0335	6.1832e-05	0.0012324	UP	--	--	--	--	--	--	--	--	--	PREDICTED: glycine-rich protein-like [Solanum tuberosum]
60	Novel03537	7582.38	3084.07	1.2978	9.4953e-07	3.4265e-05	UP	GO:0044238//GO:0071704//GO:0005975//GO:0008152//GO:0008150	primary metabolic process//organic substance metabolic process//carbohydrate metabolic process//metabolic process//biological_process	--	--	GO:0016798//GO:0005488//GO:0043169//GO:0043167//GO:0003674//GO:0004553//GO:0016787//GO:0003824	hydrolase activity, acting on glycosyl bonds//binding//cation binding//ion binding//molecular_function//hydrolase activity, hydrolyzing O-glycosyl compounds//hydrolase activity//catalytic activity	K00700 1,4-alpha-glucan branching enzyme [EC:2.4.1.18] | (RefSeq) Sbe-II; 1,4-alpha-glucan-branching enzyme 2-2, chloroplastic/amyloplastic-like	http://www.genome.jp/dbget-bin/www_bget?sot:102590711	--	1,4-alpha-glucan-branching enzyme 2-2, chloroplastic/amyloplastic-like [Solanum tuberosum]>gi|4584509|emb|CAB40746.1| starch branching enzyme II [Solanum tuberosum]
61	Novel03541	74.2532	9.83496	2.9165	0.0021398	0.020836	UP	--	--	GO:0044425//GO:0016021//GO:0031224//GO:0005575//GO:0016020	membrane part//integral component of membrane//intrinsic component of membrane//cellular_component//membrane	--	--	--	--	--	--
62	Novel03543	3777.2	1634.03	1.2089	7.0514e-05	0.0013724	UP	--	--	--	--	--	--	--	--	--	PREDICTED: uncharacterized protein LOC102587490 [Solanum tuberosum]
63	Novel03545	189.779	72.81	1.3821	0.0012928	0.014161	UP	--	--	--	--	GO:0003674//GO:0005515//GO:0005488	molecular_function//protein binding//binding	no KO assigned | (RefSeq) disease resistance protein TAO1-like	http://www.genome.jp/dbget-bin/www_bget?sot:102589440	--	PREDICTED: TMV resistance protein N-like [Solanum lycopersicum]
64	PGSC0003DMG400000047	1572.68	750.023	1.0682	0.00010863	0.0019594	UP	GO:0055085//GO:0008150//GO:0006810//GO:0051234//GO:0009987//GO:0051179	transmembrane transport//biological_process//transport//establishment of localization//cellular process//localization	GO:0044425//GO:0016020//GO:0031224//GO:0016021//GO:0005575	membrane part//membrane//intrinsic component of membrane//integral component of membrane//cellular_component	--	--	no KO assigned | (RefSeq) ascorbate transporter, chloroplastic	http://www.genome.jp/dbget-bin/www_bget?sot:102599205	ANTR2	Major facilitator superfamily domain||Major facilitator superfamily
65	PGSC0003DMG400000112	1013.65	465.983	1.1212	0.00017341	0.002855	UP	--	--	--	--	GO:0004144//GO:0003674//GO:0003824//GO:0016747//GO:0016411//GO:0016746//GO:0016740//GO:0008374	diacylglycerol O-acyltransferase activity//molecular_function//catalytic activity//transferase activity, transferring acyl groups other than amino-acyl groups//acylglycerol O-acyltransferase activity//transferase activity, transferring acyl groups//transferase activity//O-acyltransferase activity	no KO assigned | (RefSeq) O-acyltransferase WSD1-like	http://www.genome.jp/dbget-bin/www_bget?sot:102587207	-	O-acyltransferase WSD1, C-terminal
66	PGSC0003DMG400000122	15.2524	0.287341	5.7301	0.0060824	0.045763	UP	GO:0006793//GO:0008150//GO:0044267//GO:0043412//GO:0044237//GO:0008152//GO:0044260//GO:0006464//GO:0006796//GO:0019538//GO:0006468//GO:0071704//GO:0044238//GO:0043170//GO:0009987//GO:0036211//GO:0016310	phosphorus metabolic process//biological_process//cellular protein metabolic process//macromolecule modification//cellular metabolic process//metabolic process//cellular macromolecule metabolic process//cellular protein modification process//phosphate-containing compound metabolic process//protein metabolic process//protein phosphorylation//organic substance metabolic process//primary metabolic p…	--	--	GO:0035639//GO:0005488//GO:0032555//GO:0004672//GO:0032559//GO:0001882//GO:0032549//GO:0016740//GO:0016772//GO:0032550//GO:0000166//GO:0016301//GO:1901363//GO:0030554//GO:0032553//GO:0003824//GO:0005524//GO:0043168//GO:0001883//GO:0016773//GO:0017076//GO:0003674//GO:0036094//GO:0097367//GO:0097159//GO:0043167//GO:1901265	purine ribonucleoside triphosphate binding//binding//purine ribonucleotide binding//protein kinase activity//adenyl ribonucleotide binding//nucleoside binding//ribonucleoside binding//transferase activity//transferase activity, transferring phosphorus-containing groups//purine ribonucleoside binding//nucleotide binding//kinase activity//heterocyclic compound binding//adenyl nucleotide binding//ri…	K08867 WNK lysine deficient protein kinase [EC:2.7.11.1] | (RefSeq) probable serine/threonine-protein kinase WNK10	http://www.genome.jp/dbget-bin/www_bget?sot:102590354	-	Protein kinase-like domain||Protein kinase domain||Serine/threonine-protein kinase, active site
67	PGSC0003DMG400000174	73.6942	17.8429	2.0462	0.0017446	0.017919	UP	GO:0008152//GO:0009744//GO:0044237//GO:0050896//GO:0008150//GO:0042221//GO:0006259//GO:0044249//GO:1901360//GO:0034641//GO:0006139//GO:0006725//GO:0090304//GO:0010033//GO:0044238//GO:0046483//GO:0071704//GO:0034645//GO:0009987//GO:0043170//GO:1901700//GO:0009058//GO:0009059//GO:0006807//GO:0009743//GO:0006260//GO:0044260//GO:0034285//GO:1901576	metabolic process//response to sucrose//cellular metabolic process//response to stimulus//biological_process//response to chemical//DNA metabolic process//cellular biosynthetic process//organic cyclic compound metabolic process//cellular nitrogen compound metabolic process//nucleobase-containing compound metabolic process//cellular aromatic compound metabolic process//nucleic acid metabolic proce…	GO:0005623//GO:0044424//GO:0043228//GO:0043232//GO:0044427//GO:0043227//GO:0043226//GO:0032991//GO:0044464//GO:0005694//GO:0043231//GO:0000808//GO:0005634//GO:0005575//GO:0005622//GO:0044446//GO:0043229//GO:0044422	cell//intracellular part//non-membrane-bounded organelle//intracellular non-membrane-bounded organelle//chromosomal part//membrane-bounded organelle//organelle//protein-containing complex//cell part//chromosome//intracellular membrane-bounded organelle//origin recognition complex//nucleus//cellular_component//intracellular//intracellular organelle part//intracellular organelle//organelle part	--	--	K02607 origin recognition complex subunit 5 | (RefSeq) origin of replication complex subunit 5	http://www.genome.jp/dbget-bin/www_bget?sot:102599857	ORC5	P-loop containing nucleoside triphosphate hydrolase||Origin recognition complex, subunit 5
68	PGSC0003DMG400000179	700.825	268.532	1.384	1.701e-05	0.00041404	UP	GO:0019538//GO:0008037//GO:0051704//GO:0006796//GO:0048544//GO:0044260//GO:0006464//GO:0016310//GO:0032501//GO:0009875//GO:0036211//GO:0022414//GO:0044706//GO:0044703//GO:0071704//GO:0006468//GO:0044238//GO:0007154//GO:0043170//GO:0009987//GO:0006793//GO:0008150//GO:0008152//GO:0044237//GO:0009856//GO:0043412//GO:0044267	protein metabolic process//cell recognition//multi-organism process//phosphate-containing compound metabolic process//recognition of pollen//cellular macromolecule metabolic process//cellular protein modification process//phosphorylation//multicellular organismal process//pollen-pistil interaction//protein modification process//reproductive process//multi-multicellular organism process//multi-org…	GO:0005575//GO:0016021//GO:0016020//GO:0031224//GO:0044425	cellular_component//integral component of membrane//membrane//intrinsic component of membrane//membrane part	GO:0036094//GO:0003674//GO:0017076//GO:0016773//GO:1901265//GO:0043167//GO:0097159//GO:0097367//GO:0004674//GO:0016740//GO:0016772//GO:0032550//GO:0032559//GO:0001882//GO:0032549//GO:0005488//GO:0032555//GO:0004672//GO:0035639//GO:0005524//GO:0043168//GO:0001883//GO:0030554//GO:0032553//GO:0003824//GO:0016301//GO:1901363//GO:0000166	small molecule binding//molecular_function//purine nucleotide binding//phosphotransferase activity, alcohol group as acceptor//nucleoside phosphate binding//ion binding//organic cyclic compound binding//carbohydrate derivative binding//protein serine/threonine kinase activity//transferase activity//transferase activity, transferring phosphorus-containing groups//purine ribonucleoside binding//ade…	no KO assigned | (RefSeq) G-type lectin S-receptor-like serine/threonine-protein kinase SD2-2	http://www.genome.jp/dbget-bin/www_bget?sot:102604334	RLK4	S-receptor-like serine/threonine-protein kinase||PAN/Apple domain||Protein kinase domain||Protein kinase-like domain||Protein kinase, ATP binding site||Bulb-type lectin domain||S-locus glycoprotein domain||Serine/threonine-protein kinase, active site
69	PGSC0003DMG400000210	999.09	355.803	1.4895	8.8373e-07	3.2652e-05	UP	GO:0055085//GO:0008150//GO:0051234//GO:0006810//GO:0051179//GO:0009987	transmembrane transport//biological_process//establishment of localization//transport//localization//cellular process	GO:0044425//GO:0016021//GO:0005575//GO:0016020//GO:0031224	membrane part//integral component of membrane//cellular_component//membrane//intrinsic component of membrane	--	--	K14684 solute carrier family 25 (mitochondrial phosphate transporter), member 23/24/25/41 | (RefSeq) mitochondrial carrier-like protein	http://www.genome.jp/dbget-bin/www_bget?sot:102577527	-	Mitochondrial carrier protein||Mitochondrial substrate/solute carrier||Mitochondrial carrier domain
70	PGSC0003DMG400000227	1662.74	782.039	1.0882	0.002513	0.02363	UP	--	--	--	--	GO:0017111//GO:0097159//GO:0032561//GO:0016462//GO:0001882//GO:0019001//GO:0003824//GO:0005525//GO:0001883//GO:0000166//GO:1901363//GO:0003674//GO:0036094//GO:0016818//GO:0017076//GO:0043167//GO:1901265//GO:0097367//GO:0032549//GO:0016817//GO:0032550//GO:0016787//GO:0035639//GO:0032555//GO:0005488//GO:0003924//GO:0032553//GO:0043168	nucleoside-triphosphatase activity//organic cyclic compound binding//guanyl ribonucleotide binding//pyrophosphatase activity//nucleoside binding//guanyl nucleotide binding//catalytic activity//GTP binding//purine nucleoside binding//nucleotide binding//heterocyclic compound binding//molecular_function//small molecule binding//hydrolase activity, acting on acid anhydrides, in phosphorus-containing…	no KO assigned | (RefSeq) dynamin-related protein 5A	http://www.genome.jp/dbget-bin/www_bget?sot:102580332	ADL1B	Dynamin, GTPase region, conserved site||Dynamin GTPase effector||Dynamin-type guanine nucleotide-binding (G) domain||Dynamin central domain||GTPase effector domain||P-loop containing nucleoside triphosphate hydrolase||Dynamin, GTPase domain||Dynamin superfamily
71	PGSC0003DMG400000246	159.131	53.2846	1.5784	0.0039474	0.033277	UP	GO:0005984//GO:0005975//GO:1901576//GO:0044262//GO:0005992//GO:0071704//GO:0009311//GO:0008152//GO:0044237//GO:0009058//GO:0009312//GO:0009987//GO:0044238//GO:0016051//GO:0008150//GO:0044249//GO:0034637//GO:0005991//GO:0046351	disaccharide metabolic process//carbohydrate metabolic process//organic substance biosynthetic process//cellular carbohydrate metabolic process//trehalose biosynthetic process//organic substance metabolic process//oligosaccharide metabolic process//metabolic process//cellular metabolic process//biosynthetic process//oligosaccharide biosynthetic process//cellular process//primary metabolic process…	--	--	GO:0003674//GO:0003824	molecular_function//catalytic activity	K16055 trehalose 6-phosphate synthase/phosphatase [EC:2.4.1.15 3.1.3.12] | (RefSeq) alpha,alpha-trehalose-phosphate synthase [UDP-forming] 5	http://www.genome.jp/dbget-bin/www_bget?sot:102605988	ATTPS5	-||Glycosyl transferase, family 20||Trehalose-phosphatase||Helitron helicase-like domain||HAD-like domain
72	PGSC0003DMG400000251	874.693	436.641	1.0023	0.00089461	0.010721	UP	--	--	GO:0031224//GO:0016020//GO:0005575//GO:0016021//GO:0044425	intrinsic component of membrane//membrane//cellular_component//integral component of membrane//membrane part	--	--	K15277 solute carrier family 35 (adenosine 3'-phospho 5'-phosphosulfate transporter), member B3 | (RefSeq) UDP-galactose/UDP-glucose transporter 4-like	http://www.genome.jp/dbget-bin/www_bget?sot:102596365	--	--
73	PGSC0003DMG400000301	71.3156	14.6975	2.2786	0.0010987	0.012492	UP	--	--	GO:0031224//GO:0044425//GO:0005575//GO:0016021//GO:0016020	intrinsic component of membrane//membrane part//cellular_component//integral component of membrane//membrane	--	--	K10664 E3 ubiquitin-protein ligase ATL6/9/15/31/42/55 [EC:2.3.2.27] | (RefSeq) E3 ubiquitin-protein ligase ATL42-like	http://www.genome.jp/dbget-bin/www_bget?sot:102600705	-	Zinc finger, RING-type||Zinc finger, RING/FYVE/PHD-type
74	PGSC0003DMG400000350	2688.13	1323.76	1.022	0.00011291	0.0020166	UP	--	--	--	--	GO:0043169//GO:0005488//GO:0046872//GO:0043167//GO:0003674	cation binding//binding//metal ion binding//ion binding//molecular_function	no KO assigned | (RefSeq) zinc finger CCCH domain-containing protein 20	http://www.genome.jp/dbget-bin/www_bget?sot:102604427	ATCTH	Zinc finger, CCCH-type
75	PGSC0003DMG400000511	398.981	107.631	1.8902	0.0012684	0.013945	UP	GO:0044237//GO:0008152//GO:0006950//GO:0042744//GO:0009056//GO:0055114//GO:0009987//GO:0044248//GO:0042743//GO:0008150//GO:0072593//GO:0050896//GO:0006979	cellular metabolic process//metabolic process//response to stress//hydrogen peroxide catabolic process//catabolic process//oxidation-reduction process//cellular process//cellular catabolic process//hydrogen peroxide metabolic process//biological_process//reactive oxygen species metabolic process//response to stimulus//response to oxidative stress	GO:0005575//GO:0005576	cellular_component//extracellular region	GO:0003674//GO:0046872//GO:0043167//GO:0005488//GO:0046906//GO:0004601//GO:0016209//GO:0043169//GO:0097159//GO:0016491//GO:1901363//GO:0020037//GO:0016684//GO:0003824	molecular_function//metal ion binding//ion binding//binding//tetrapyrrole binding//peroxidase activity//antioxidant activity//cation binding//organic cyclic compound binding//oxidoreductase activity//heterocyclic compound binding//heme binding//oxidoreductase activity, acting on peroxide as acceptor//catalytic activity	K00430 peroxidase [EC:1.11.1.7] | (RefSeq) peroxidase 63	http://www.genome.jp/dbget-bin/www_bget?sot:102580657	-	Secretory peroxidase||Haem peroxidase, plant/fungal/bacterial||Haem peroxidase||Plant peroxidase||Peroxidase, active site||Peroxidases heam-ligand binding site
76	PGSC0003DMG400000561	1879.41	906.31	1.0522	0.0001808	0.0029572	UP	--	--	--	--	--	--	K11805 WD repeat-containing protein 68 | (RefSeq) protein TRANSPARENT TESTA GLABRA 1-like	http://www.genome.jp/dbget-bin/www_bget?sot:102589991	-	WD40/YVTN repeat-like-containing domain||WD40 repeat, conserved site||WD40 repeat||WD40-repeat-containing domain
77	PGSC0003DMG400000697	62.1616	15.3695	2.016	0.0055031	0.042528	UP	--	--	--	--	--	--	--	--	--	--
78	PGSC0003DMG400000732	70.9515	15.9099	2.1569	0.0014214	0.015229	UP	--	--	--	--	--	--	no KO assigned | (RefSeq) putative aminoacrylate hydrolase RutD	http://www.genome.jp/dbget-bin/www_bget?sot:102589861	-	Alpha/Beta hydrolase fold||Alpha/beta hydrolase fold-1
79	PGSC0003DMG400000776	10065.7	407.409	4.6268	0.00011184	0.0020052	UP	GO:0009664//GO:0071555//GO:0045229//GO:0071840//GO:0071554//GO:0016043//GO:0009987//GO:0008150//GO:0071669	plant-type cell wall organization//cell wall organization//external encapsulating structure organization//cellular component organization or biogenesis//cell wall organization or biogenesis//cellular component organization//cellular process//biological_process//plant-type cell wall organization or biogenesis	--	--	GO:0005198//GO:0003674//GO:0005199	structural molecule activity//molecular_function//structural constituent of cell wall	--	--	-	Extensin domain
80	PGSC0003DMG400001096	1482.64	630.871	1.2328	0.0009851	0.011523	UP	GO:0051179//GO:0008150//GO:0006810//GO:0051234	localization//biological_process//transport//establishment of localization	GO:0016020//GO:0005575//GO:0016021//GO:0044425//GO:0031224	membrane//cellular_component//integral component of membrane//membrane part//intrinsic component of membrane	--	--	no KO assigned | (RefSeq) probable folate-biopterin transporter 4	http://www.genome.jp/dbget-bin/www_bget?sot:102597855	-	Folate-biopterin transporter||Major facilitator superfamily domain
81	PGSC0003DMG400001126	3785.67	1877.44	1.0118	0.0001664	0.002758	UP	GO:0034641//GO:0006366//GO:0016070//GO:0044249//GO:0008150//GO:0032774//GO:0043933//GO:0016570//GO:0044267//GO:0043412//GO:0018130//GO:0019438//GO:0034654//GO:0016569//GO:0010467//GO:0006996//GO:0006368//GO:0071840//GO:0006807//GO:0019538//GO:0009058//GO:0009987//GO:0044238//GO:0006325//GO:0046483//GO:0006354//GO:0036211//GO:0090304//GO:0016043//GO:1901362//GO:1901360//GO:0006139//GO:0044271//GO:…	cellular nitrogen compound metabolic process//transcription by RNA polymerase II//RNA metabolic process//cellular biosynthetic process//biological_process//RNA biosynthetic process//protein-containing complex subunit organization//histone modification//cellular protein metabolic process//macromolecule modification//heterocycle biosynthetic process//aromatic compound biosynthetic process//nucleoba…	GO:0016593//GO:0055029//GO:0005623//GO:0031974//GO:0005622//GO:0061695//GO:0000428//GO:0005634//GO:0044464//GO:0043226//GO:0043233//GO:1990234//GO:0044451//GO:0016591//GO:0044424//GO:0008023//GO:0031981//GO:0030880//GO:1902494//GO:0044422//GO:0070013//GO:0044446//GO:0005654//GO:0043229//GO:0005575//GO:0043231//GO:0032991//GO:0044428//GO:0043227	Cdc73/Paf1 complex//nuclear DNA-directed RNA polymerase complex//cell//membrane-enclosed lumen//intracellular//transferase complex, transferring phosphorus-containing groups//DNA-directed RNA polymerase complex//nucleus//cell part//organelle//organelle lumen//transferase complex//nucleoplasm part//DNA-directed RNA polymerase II, holoenzyme//intracellular part//transcription elongation factor comp…	GO:0003676//GO:0003677//GO:1901363//GO:0046914//GO:0043169//GO:0097159//GO:0005488//GO:0008270//GO:0003674//GO:0046872//GO:0043167	nucleic acid binding//DNA binding//heterocyclic compound binding//transition metal ion binding//cation binding//organic cyclic compound binding//binding//zinc ion binding//molecular_function//metal ion binding//ion binding	no KO assigned | (RefSeq) uncharacterized LOC102591467	http://www.genome.jp/dbget-bin/www_bget?sot:102591467	TZP	Plus-3 domain||Zinc finger, CCHC-type||RNA polymerase-associated protein Rtf1
82	PGSC0003DMG400001147	1812.02	723.903	1.3237	1.3389e-06	4.5678e-05	UP	--	--	--	--	--	--	no KO assigned | (RefSeq) P-loop NTPase domain-containing protein LPA1 homolog 2	http://www.genome.jp/dbget-bin/www_bget?sot:102595156	-	P-loop containing nucleoside triphosphate hydrolase
83	PGSC0003DMG400001179	1993.81	677.68	1.5568	0.0015783	0.016582	UP	GO:0008152//GO:0008150	metabolic process//biological_process	GO:0016020//GO:0016021//GO:0005575//GO:0044425//GO:0031224	membrane//integral component of membrane//cellular_component//membrane part//intrinsic component of membrane	GO:0003674//GO:0016787//GO:0003824	molecular_function//hydrolase activity//catalytic activity	K15889 prenylcysteine alpha-carboxyl methylesterase [EC:3.1.1.-] | (RefSeq) isoprenylcysteine alpha-carbonyl methylesterase ICME-like	http://www.genome.jp/dbget-bin/www_bget?sot:102602467	-	Alpha/beta hydrolase fold-3||Alpha/Beta hydrolase fold||Carboxylesterase, type B
84	PGSC0003DMG400001211	33.3967	2.00649	4.057	0.00049456	0.0066217	UP	--	--	GO:0031224//GO:0044425//GO:0016021//GO:0005575//GO:0016020	intrinsic component of membrane//membrane part//integral component of membrane//cellular_component//membrane	--	--	no KO assigned | (RefSeq) glucan endo-1,3-beta-glucosidase-like protein 3-like	http://www.genome.jp/dbget-bin/www_bget?sot:102595638	-	X8 domain
85	PGSC0003DMG400001227	311.191	68.5315	2.183	0.0010811	0.01237	UP	--	--	--	--	--	--	no KO assigned | (RefSeq) gibberellin-regulated protein 6	http://www.genome.jp/dbget-bin/www_bget?sot:102600781	-	Gibberellin regulated protein
86	PGSC0003DMG400001247	1930.26	796.415	1.2772	5.438e-06	0.00015501	UP	GO:0008150//GO:0034641//GO:0044281//GO:0046483//GO:0044238//GO:0009987//GO:0019637//GO:0006807//GO:0006796//GO:0008152//GO:0046939//GO:0044237//GO:0006753//GO:0006793//GO:1901360//GO:0006139//GO:0016310//GO:0006725//GO:0009117//GO:0071704//GO:0055086	biological_process//cellular nitrogen compound metabolic process//small molecule metabolic process//heterocycle metabolic process//primary metabolic process//cellular process//organophosphate metabolic process//nitrogen compound metabolic process//phosphate-containing compound metabolic process//metabolic process//nucleotide phosphorylation//cellular metabolic process//nucleoside phosphate metabo…	--	--	GO:0001883//GO:0030554//GO:0003824//GO:1901363//GO:0000166//GO:0016740//GO:0016772//GO:0001882//GO:0097159//GO:0019205//GO:0005524//GO:0016776//GO:0043168//GO:0032553//GO:0016301//GO:0004017//GO:0032550//GO:0032559//GO:0032549//GO:0032555//GO:0005488//GO:0035639//GO:0043167//GO:1901265//GO:0097367//GO:0036094//GO:0003674//GO:0017076	purine nucleoside binding//adenyl nucleotide binding//catalytic activity//heterocyclic compound binding//nucleotide binding//transferase activity//transferase activity, transferring phosphorus-containing groups//nucleoside binding//organic cyclic compound binding//nucleobase-containing compound kinase activity//ATP binding//phosphotransferase activity, phosphate group as acceptor//anion binding//…	K00939 adenylate kinase [EC:2.7.4.3] | (RefSeq) adk; adenylate kinase 4	http://www.genome.jp/dbget-bin/www_bget?sot:102581819	-	Adenylate kinase/UMP-CMP kinase||Adenylate kinase, conserved site||Adenylate kinase, active site lid domain||Adenylate kinase subfamily||P-loop containing nucleoside triphosphate hydrolase
87	PGSC0003DMG400001271	96.3989	32.1294	1.5851	0.0061785	0.046258	UP	GO:0008152//GO:0044237//GO:0006793//GO:0016310//GO:0043170//GO:0071704//GO:0006464//GO:0044260//GO:0044267//GO:0043412//GO:0008150//GO:0009987//GO:0006468//GO:0044238//GO:0036211//GO:0019538//GO:0006796	metabolic process//cellular metabolic process//phosphorus metabolic process//phosphorylation//macromolecule metabolic process//organic substance metabolic process//cellular protein modification process//cellular macromolecule metabolic process//cellular protein metabolic process//macromolecule modification//biological_process//cellular process//protein phosphorylation//primary metabolic process//…	GO:0044425//GO:0016020//GO:0005575//GO:0016021//GO:0031224	membrane part//membrane//cellular_component//integral component of membrane//intrinsic component of membrane	GO:0032553//GO:0043168//GO:0005524//GO:0016301//GO:0032549//GO:0032559//GO:0032550//GO:0035639//GO:0005488//GO:0032555//GO:0043167//GO:1901265//GO:0097367//GO:0003674//GO:0036094//GO:0017076//GO:0003824//GO:0030554//GO:0001883//GO:0000166//GO:1901363//GO:0001882//GO:0016772//GO:0016740//GO:0004672//GO:0097159//GO:0016773	ribonucleotide binding//anion binding//ATP binding//kinase activity//ribonucleoside binding//adenyl ribonucleotide binding//purine ribonucleoside binding//purine ribonucleoside triphosphate binding//binding//purine ribonucleotide binding//ion binding//nucleoside phosphate binding//carbohydrate derivative binding//molecular_function//small molecule binding//purine nucleotide binding//catalytic act…	K04733 interleukin-1 receptor-associated kinase 4 [EC:2.7.11.1] | (RefSeq) probable receptor-like protein kinase At5g39020	http://www.genome.jp/dbget-bin/www_bget?sot:102605942	-	Protein kinase, ATP binding site||Protein kinase domain||Serine/threonine-protein kinase, active site||Protein kinase-like domain
88	PGSC0003DMG400001331	66.8437	8.83511	2.9195	0.00010649	0.0019268	UP	--	--	--	--	--	--	--	--	--	--
89	PGSC0003DMG400001400	239.647	70.3902	1.7675	0.00022305	0.003482	UP	GO:0055085//GO:0051179//GO:0009987//GO:0006810//GO:0051234//GO:0008150	transmembrane transport//localization//cellular process//transport//establishment of localization//biological_process	GO:0016021//GO:0005575//GO:0016020//GO:0044425//GO:0031224	integral component of membrane//cellular_component//membrane//membrane part//intrinsic component of membrane	GO:0015399//GO:0017076//GO:0003674//GO:0036094//GO:0016818//GO:0097367//GO:1901265//GO:0043167//GO:0035639//GO:0042623//GO:0032555//GO:0005488//GO:0032549//GO:0016817//GO:0032559//GO:0032550//GO:0016787//GO:0015405//GO:0032553//GO:0043168//GO:0005524//GO:0005215//GO:0022804//GO:0042626//GO:0043492//GO:0017111//GO:0016462//GO:0097159//GO:0022857//GO:0001882//GO:0016887//GO:0000166//GO:1901363//GO:…	primary active transmembrane transporter activity//purine nucleotide binding//molecular_function//small molecule binding//hydrolase activity, acting on acid anhydrides, in phosphorus-containing anhydrides//carbohydrate derivative binding//nucleoside phosphate binding//ion binding//purine ribonucleoside triphosphate binding//ATPase activity, coupled//purine ribonucleotide binding//binding//ribonuc…	K05658 ATP-binding cassette, subfamily B (MDR/TAP), member 1 [EC:3.6.3.44] | (RefSeq) ABC transporter B family member 15-like	http://www.genome.jp/dbget-bin/www_bget?sot:102600853	-	ABC transporter-like||P-loop containing nucleoside triphosphate hydrolase||ABC transporter, conserved site||ABC transporter type 1, transmembrane domain||AAA+ ATPase domain
90	PGSC0003DMG400001417	169.769	6.89292	4.6223	0.0022485	0.021669	UP	GO:0006725//GO:0019222//GO:0097659//GO:0071704//GO:0034645//GO:0006351//GO:0043170//GO:0009059//GO:0019219//GO:0044260//GO:1901576//GO:2001141//GO:0008152//GO:0051252//GO:0044237//GO:0044271//GO:1903506//GO:1901360//GO:0006139//GO:1901362//GO:0080090//GO:0090304//GO:0044238//GO:0046483//GO:0009987//GO:0051171//GO:0009058//GO:0006807//GO:0010467//GO:0060255//GO:0010556//GO:0019438//GO:0034654//GO:…	cellular aromatic compound metabolic process//regulation of metabolic process//nucleic acid-templated transcription//organic substance metabolic process//cellular macromolecule biosynthetic process//transcription, DNA-templated//macromolecule metabolic process//macromolecule biosynthetic process//regulation of nucleobase-containing compound metabolic process//cellular macromolecule metabolic proc…	GO:0043227//GO:0043231//GO:0005575//GO:0043229//GO:0044424//GO:0043226//GO:0044464//GO:0005634//GO:0005622//GO:0005623	membrane-bounded organelle//intracellular membrane-bounded organelle//cellular_component//intracellular organelle//intracellular part//organelle//cell part//nucleus//intracellular//cell	GO:0003700//GO:0003674//GO:0005488//GO:0097159//GO:1901363//GO:0003677//GO:0003676//GO:0043565	DNA-binding transcription factor activity//molecular_function//binding//organic cyclic compound binding//heterocyclic compound binding//DNA binding//nucleic acid binding//sequence-specific DNA binding	K09338 homeobox-leucine zipper protein | (RefSeq) homeobox-leucine zipper protein HAT7-like	http://www.genome.jp/dbget-bin/www_bget?sot:102589263	-	Helix-turn-helix motif||Homeobox domain||Homeobox domain-like||Homeobox, conserved site||Leucine zipper, homeobox-associated
91	PGSC0003DMG400001514	461.956	217.611	1.086	0.001035	0.011961	UP	GO:0006468//GO:0044238//GO:0009987//GO:0036211//GO:0019538//GO:0006796//GO:0044267//GO:0043412//GO:0008150//GO:0016310//GO:0071704//GO:0043170//GO:0044260//GO:0006464//GO:0008152//GO:0044237//GO:0006793	protein phosphorylation//primary metabolic process//cellular process//protein modification process//protein metabolic process//phosphate-containing compound metabolic process//cellular protein metabolic process//macromolecule modification//biological_process//phosphorylation//organic substance metabolic process//macromolecule metabolic process//cellular macromolecule metabolic process//cellular p…	--	--	GO:0097159//GO:0004674//GO:0016773//GO:0030554//GO:0003824//GO:0001883//GO:0000166//GO:1901363//GO:0001882//GO:0016740//GO:0016772//GO:0004672//GO:0043167//GO:1901265//GO:0097367//GO:0003674//GO:0036094//GO:0017076//GO:0032553//GO:0005524//GO:0043168//GO:0016301//GO:0032559//GO:0032549//GO:0032550//GO:0035639//GO:0005488//GO:0032555	organic cyclic compound binding//protein serine/threonine kinase activity//phosphotransferase activity, alcohol group as acceptor//adenyl nucleotide binding//catalytic activity//purine nucleoside binding//nucleotide binding//heterocyclic compound binding//nucleoside binding//transferase activity//transferase activity, transferring phosphorus-containing groups//protein kinase activity//ion binding…	K08832 serine/threonine-protein kinase SRPK3 [EC:2.7.11.1] | (RefSeq) SRSF protein kinase 1	http://www.genome.jp/dbget-bin/www_bget?sot:102601097	-	Protein kinase-like domain||Protein kinase domain||Protein kinase, ATP binding site||Serine/threonine-protein kinase, active site
92	PGSC0003DMG400001551	3342.08	1574.83	1.0856	6.0274e-05	0.0012054	UP	GO:0006725//GO:0071704//GO:0043170//GO:0044260//GO:0008152//GO:0044237//GO:1901360//GO:0006139//GO:0090304//GO:0044238//GO:0046483//GO:0009987//GO:0006396//GO:0006807//GO:0010467//GO:0008150//GO:0016070//GO:0034641	cellular aromatic compound metabolic process//organic substance metabolic process//macromolecule metabolic process//cellular macromolecule metabolic process//metabolic process//cellular metabolic process//organic cyclic compound metabolic process//nucleobase-containing compound metabolic process//nucleic acid metabolic process//primary metabolic process//heterocycle metabolic process//cellular pr…	--	--	--	--	no KO assigned | (RefSeq) uncharacterized LOC102581917	http://www.genome.jp/dbget-bin/www_bget?sot:102581917	-	HAT (Half-A-TPR) repeat||Tetratricopeptide repeat-containing domain||Tetratricopeptide-like helical domain
93	PGSC0003DMG400001590	11744.8	5541.4	1.0837	4.2857e-05	0.00090629	UP	GO:0010468//GO:0032774//GO:2000112//GO:0065007//GO:0031326//GO:0008150//GO:0006355//GO:0050789//GO:0044249//GO:0031323//GO:0016070//GO:0009889//GO:0034641//GO:0010556//GO:0060255//GO:0034654//GO:0019438//GO:0050794//GO:0018130//GO:0009058//GO:0006807//GO:0010467//GO:1901362//GO:0090304//GO:0080090//GO:0044238//GO:0046483//GO:0009987//GO:0051171//GO:0044271//GO:1903506//GO:0006139//GO:1901360//GO:…	regulation of gene expression//RNA biosynthetic process//regulation of cellular macromolecule biosynthetic process//biological regulation//regulation of cellular biosynthetic process//biological_process//regulation of transcription, DNA-templated//regulation of biological process//cellular biosynthetic process//regulation of cellular metabolic process//RNA metabolic process//regulation of biosynt…	--	--	GO:1901363//GO:0003677//GO:0003676//GO:0097159//GO:0005488//GO:0003674	heterocyclic compound binding//DNA binding//nucleic acid binding//organic cyclic compound binding//binding//molecular_function	no KO assigned | (RefSeq) glycine-rich protein 2-like	http://www.genome.jp/dbget-bin/www_bget?sot:102590251	-	Cold-shock protein, DNA-binding||Cold-shock conserved site||Cold shock domain||Nucleic acid-binding, OB-fold
94	PGSC0003DMG400001614	17.9824	0	Inf	0.00093398	0.011099	UP	GO:0009719//GO:0009733//GO:0010033//GO:0009725//GO:0008150//GO:0042221//GO:0050896	response to endogenous stimulus//response to auxin//response to organic substance//response to hormone//biological_process//response to chemical//response to stimulus	--	--	--	--	K14488 SAUR family protein | (RefSeq) auxin-induced protein 15A-like	http://www.genome.jp/dbget-bin/www_bget?sot:102601200	-	Small auxin-up RNA
95	PGSC0003DMG400001656	501.77	236.331	1.0862	0.001946	0.019484	UP	GO:0009145//GO:0009167//GO:0098655//GO:1901293//GO:1901362//GO:0046390//GO:0009205//GO:0044281//GO:0042451//GO:0006754//GO:0044238//GO:0009152//GO:0046483//GO:0009987//GO:0009150//GO:0006807//GO:0019637//GO:0009058//GO:0009260//GO:0051179//GO:0009124//GO:0009142//GO:0009163//GO:0006796//GO:0015986//GO:0034654//GO:0019438//GO:0009201//GO:0072521//GO:0009116//GO:0009126//GO:0006163//GO:0046128//GO:…	purine nucleoside triphosphate biosynthetic process//purine ribonucleoside monophosphate metabolic process//cation transmembrane transport//nucleoside phosphate biosynthetic process//organic cyclic compound biosynthetic process//ribose phosphate biosynthetic process//purine ribonucleoside triphosphate metabolic process//small molecule metabolic process//purine nucleoside biosynthetic process//ATP…	GO:0031224//GO:0005740//GO:0031975//GO:0044464//GO:0098800//GO:0043226//GO:0044455//GO:0005622//GO:0098798//GO:0005623//GO:0044444//GO:0033177//GO:0019866//GO:0045263//GO:0005743//GO:0098796//GO:0031967//GO:0043227//GO:0031090//GO:0016020//GO:0005739//GO:0044429//GO:0032991//GO:0005575//GO:0005753//GO:0016469//GO:0043231//GO:0016021//GO:0044422//GO:0044446//GO:0043229//GO:0005737//GO:0044425//GO:…	intrinsic component of membrane//mitochondrial envelope//envelope//cell part//inner mitochondrial membrane protein complex//organelle//mitochondrial membrane part//intracellular//mitochondrial protein complex//cell//cytoplasmic part//proton-transporting two-sector ATPase complex, proton-transporting domain//organelle inner membrane//proton-transporting ATP synthase complex, coupling factor F(o)//…	GO:0005215//GO:0015075//GO:0008324//GO:0022890//GO:0022857//GO:0015078//GO:0003674//GO:0015077	transporter activity//ion transmembrane transporter activity//cation transmembrane transporter activity//inorganic cation transmembrane transporter activity//transmembrane transporter activity//proton transmembrane transporter activity//molecular_function//monovalent inorganic cation transmembrane transporter activity	no KO assigned | (RefSeq) uncharacterized LOC102599862	http://www.genome.jp/dbget-bin/www_bget?sot:102599862	-	ATP synthase, F0 complex, subunit E, mitochondrial
96	PGSC0003DMG400001703	202.492	85.5778	1.2426	0.0034949	0.030328	UP	GO:0008150//GO:0048285//GO:0000280//GO:0071840//GO:0000278//GO:0007064//GO:0006996//GO:0098813//GO:0009987//GO:0016043//GO:0007049//GO:0000819//GO:0007059//GO:1903047//GO:0007062//GO:0022402//GO:0051276//GO:0000070	biological_process//organelle fission//nuclear division//cellular component organization or biogenesis//mitotic cell cycle//mitotic sister chromatid cohesion//organelle organization//nuclear chromosome segregation//cellular process//cellular component organization//cell cycle//sister chromatid segregation//chromosome segregation//mitotic cell cycle process//sister chromatid cohesion//cell cycle p…	GO:0044427//GO:0043228//GO:0005623//GO:0005622//GO:0043226//GO:0044464//GO:0043232//GO:0044424//GO:0044446//GO:0043229//GO:0044422//GO:0005575//GO:0032991//GO:0031390//GO:0005694	chromosomal part//non-membrane-bounded organelle//cell//intracellular//organelle//cell part//intracellular non-membrane-bounded organelle//intracellular part//intracellular organelle part//intracellular organelle//organelle part//cellular_component//protein-containing complex//Ctf18 RFC-like complex//chromosome	--	--	K11271 sister chromatid cohesion protein DCC1 | (RefSeq) sister chromatid cohesion protein DCC1	http://www.genome.jp/dbget-bin/www_bget?sot:102578670	-	Sister chromatid cohesion protein Dcc1
97	PGSC0003DMG400001709	1181.03	419.229	1.4942	7.5515e-05	0.0014527	UP	GO:0044271//GO:0006139//GO:1901360//GO:0006753//GO:0006793//GO:0006220//GO:0072528//GO:0044237//GO:0008152//GO:0046939//GO:0055086//GO:1901576//GO:0009117//GO:0071704//GO:0006725//GO:0016310//GO:0044249//GO:0090407//GO:1901566//GO:0006221//GO:0034641//GO:0009165//GO:1901564//GO:0008150//GO:0046112//GO:0018130//GO:0072527//GO:0009112//GO:0034654//GO:0019438//GO:0006796//GO:0019856//GO:0019637//GO:…	cellular nitrogen compound biosynthetic process//nucleobase-containing compound metabolic process//organic cyclic compound metabolic process//nucleoside phosphate metabolic process//phosphorus metabolic process//pyrimidine nucleotide metabolic process//pyrimidine-containing compound biosynthetic process//cellular metabolic process//metabolic process//nucleotide phosphorylation//nucleobase-contain…	GO:0044424//GO:0005737//GO:0043229//GO:0043231//GO:0005575//GO:0043227//GO:0005623//GO:0005634//GO:0005622//GO:0043226//GO:0044464	intracellular part//cytoplasm//intracellular organelle//intracellular membrane-bounded organelle//cellular_component//membrane-bounded organelle//cell//nucleus//intracellular//organelle//cell part	GO:0005488//GO:0032555//GO:0035639//GO:0032550//GO:0032549//GO:0032559//GO:0016301//GO:0009041//GO:0043168//GO:0005524//GO:0016776//GO:0032553//GO:0017076//GO:0004127//GO:0036094//GO:0003674//GO:0097367//GO:1901265//GO:0043167//GO:0016772//GO:0016740//GO:0001882//GO:1901363//GO:0000166//GO:0001883//GO:0003824//GO:0030554//GO:0019205//GO:0097159	binding//purine ribonucleotide binding//purine ribonucleoside triphosphate binding//purine ribonucleoside binding//ribonucleoside binding//adenyl ribonucleotide binding//kinase activity//uridylate kinase activity//anion binding//ATP binding//phosphotransferase activity, phosphate group as acceptor//ribonucleotide binding//purine nucleotide binding//cytidylate kinase activity//small molecule bindi…	K13800 UMP-CMP kinase [EC:2.7.4.- 2.7.4.14] | (RefSeq) UMP-CMP kinase 3-like	http://www.genome.jp/dbget-bin/www_bget?sot:102583881	PYR6	Adenylate kinase, conserved site||Adenylate kinase/UMP-CMP kinase||P-loop containing nucleoside triphosphate hydrolase||UMP-CMP kinase
98	PGSC0003DMG400001773	43.2354	7.02094	2.6225	0.0033358	0.029237	UP	GO:0044237//GO:0008152//GO:0006793//GO:0071704//GO:0043170//GO:0016310//GO:0044260//GO:0006464//GO:0043412//GO:0044267//GO:0008150//GO:0044238//GO:0006468//GO:0009987//GO:0036211//GO:0006796//GO:0019538	cellular metabolic process//metabolic process//phosphorus metabolic process//organic substance metabolic process//macromolecule metabolic process//phosphorylation//cellular macromolecule metabolic process//cellular protein modification process//macromolecule modification//cellular protein metabolic process//biological_process//primary metabolic process//protein phosphorylation//cellular process//…	GO:0044425//GO:0016020//GO:0016021//GO:0005575//GO:0031224	membrane part//membrane//integral component of membrane//cellular_component//intrinsic component of membrane	GO:0016301//GO:0032553//GO:0005524//GO:0043168//GO:0035639//GO:0032555//GO:0005488//GO:0032559//GO:0032549//GO:0032550//GO:0097367//GO:0043167//GO:1901265//GO:0017076//GO:0003674//GO:0036094//GO:0000166//GO:1901363//GO:0030554//GO:0003824//GO:0001883//GO:0030246//GO:0004672//GO:0001882//GO:0016740//GO:0016772//GO:0097159//GO:0016773	kinase activity//ribonucleotide binding//ATP binding//anion binding//purine ribonucleoside triphosphate binding//purine ribonucleotide binding//binding//adenyl ribonucleotide binding//ribonucleoside binding//purine ribonucleoside binding//carbohydrate derivative binding//ion binding//nucleoside phosphate binding//purine nucleotide binding//molecular_function//small molecule binding//nucleotide bi…	no KO assigned | (RefSeq) L-type lectin-domain containing receptor kinase VIII.1-like	http://www.genome.jp/dbget-bin/www_bget?sot:102589086	-	Legume lectin domain||Protein kinase, ATP binding site||Protein kinase domain||Serine/threonine-protein kinase, active site||Protein kinase-like domain||Concanavalin A-like lectin/glucanase domain
99	PGSC0003DMG400001879	198.126	28.5408	2.7953	0.00065821	0.0083857	UP	--	--	--	--	GO:0043169//GO:0005543//GO:0008289//GO:0005544//GO:0043168//GO:0005509//GO:0005488//GO:0046872//GO:0043167//GO:0003674	cation binding//phospholipid binding//lipid binding//calcium-dependent phospholipid binding//anion binding//calcium ion binding//binding//metal ion binding//ion binding//molecular_function	K17095 annexin A7/11 | (RefSeq) annexin D2-like	http://www.genome.jp/dbget-bin/www_bget?sot:102586975	-	Annexin||Annexin D, plant||Annexin repeat, conserved site||Annexin repeat
100	PGSC0003DMG400001895	328.846	137.658	1.2563	0.00061544	0.0079464	UP	--	--	GO:0044425//GO:0016020//GO:0005575//GO:0016021//GO:0031224	membrane part//membrane//cellular_component//integral component of membrane//intrinsic component of membrane	--	--	no KO assigned | (RefSeq) uncharacterized LOC102588498	http://www.genome.jp/dbget-bin/www_bget?sot:102588498	--	--
101	PGSC0003DMG400001904	10359.2	2544.88	2.0252	0.00061978	0.0079896	UP	GO:0008150//GO:0051234//GO:0006810//GO:0051179//GO:0071702//GO:0006869//GO:0010876//GO:0033036	biological_process//establishment of localization//transport//localization//organic substance transport//lipid transport//lipid localization//macromolecule localization	--	--	GO:0008289//GO:0005488//GO:0003674	lipid binding//binding//molecular_function	no KO assigned | (RefSeq) non-specific lipid-transfer protein 1-like	http://www.genome.jp/dbget-bin/www_bget?sot:102587043	-	Bifunctional inhibitor/plant lipid transfer protein/seed storage helical domain||Plant lipid transfer protein/Par allergen
102	PGSC0003DMG400001945	673.085	212.386	1.6641	1.8654e-07	8.2891e-06	UP	--	--	GO:0016021//GO:0005575//GO:0016020//GO:0044425//GO:0031224	integral component of membrane//cellular_component//membrane//membrane part//intrinsic component of membrane	--	--	--	--	--	--
103	PGSC0003DMG400002026	1129.97	527.181	1.0999	0.0032698	0.028819	UP	GO:0007018//GO:0007017//GO:0009987//GO:0006928//GO:0008150	microtubule-based movement//microtubule-based process//cellular process//movement of cell or subcellular component//biological_process	GO:0032991//GO:0015630//GO:0044422//GO:0043229//GO:0044446//GO:0005575//GO:0044424//GO:0005874//GO:0043232//GO:0044464//GO:0043226//GO:0005622//GO:0044430//GO:0005623//GO:0043228//GO:0005856	protein-containing complex//microtubule cytoskeleton//organelle part//intracellular organelle//intracellular organelle part//cellular_component//intracellular part//microtubule//intracellular non-membrane-bounded organelle//cell part//organelle//intracellular//cytoskeletal part//cell//non-membrane-bounded organelle//cytoskeleton	GO:0003777//GO:0097367//GO:0043167//GO:1901265//GO:0015631//GO:0017076//GO:0003674//GO:0036094//GO:0016818//GO:0008092//GO:0032553//GO:0005524//GO:0043168//GO:0035639//GO:0003774//GO:0032555//GO:0005488//GO:0008017//GO:0032559//GO:0032549//GO:0016817//GO:0032550//GO:0016787//GO:0044877//GO:0016462//GO:0097159//GO:0005515//GO:0017111//GO:0000166//GO:1901363//GO:0030554//GO:0003824//GO:0001883//GO:…	microtubule motor activity//carbohydrate derivative binding//ion binding//nucleoside phosphate binding//tubulin binding//purine nucleotide binding//molecular_function//small molecule binding//hydrolase activity, acting on acid anhydrides, in phosphorus-containing anhydrides//cytoskeletal protein binding//ribonucleotide binding//ATP binding//anion binding//purine ribonucleoside triphosphate bindin…	K10398 kinesin family member 11 | (RefSeq) 125 kDa kinesin-related protein-like	http://www.genome.jp/dbget-bin/www_bget?sot:102600125	-	P-loop containing nucleoside triphosphate hydrolase||Kinesin motor domain||Kinesin motor domain, conserved site
104	PGSC0003DMG400002099	1335.67	530.328	1.3326	3.9844e-06	0.00011798	UP	GO:0055085//GO:0009987//GO:0051179//GO:0051234//GO:0006810//GO:0008150	transmembrane transport//cellular process//localization//establishment of localization//transport//biological_process	GO:0016020//GO:0016021//GO:0005575//GO:0044425//GO:0031224	membrane//integral component of membrane//cellular_component//membrane part//intrinsic component of membrane	--	--	K15109 solute carrier family 25 (mitochondrial carnitine/acylcarnitine transporter), member 20/29 | (RefSeq) mitochondrial carnitine/acylcarnitine carrier-like protein	http://www.genome.jp/dbget-bin/www_bget?sot:102580239	-	Mitochondrial carrier protein||Mitochondrial substrate/solute carrier||Mitochondrial carrier domain
105	PGSC0003DMG400002151	427.196	172.759	1.3061	0.00010021	0.0018353	UP	GO:0030001//GO:0006810//GO:0051234//GO:0008150//GO:0009987//GO:0051179//GO:0006811//GO:0055085//GO:0006812	metal ion transport//transport//establishment of localization//biological_process//cellular process//localization//ion transport//transmembrane transport//cation transport	GO:0031224//GO:0044425//GO:0016020//GO:0016021//GO:0005575	intrinsic component of membrane//membrane part//membrane//integral component of membrane//cellular_component	GO:0008324//GO:0015075//GO:0022857//GO:0022890//GO:0005215//GO:0046873//GO:0003674	cation transmembrane transporter activity//ion transmembrane transporter activity//transmembrane transporter activity//inorganic cation transmembrane transporter activity//transporter activity//metal ion transmembrane transporter activity//molecular_function	K14709 solute carrier family 39 (zinc transporter), member 1/2/3 | (RefSeq) zinc transporter 2	http://www.genome.jp/dbget-bin/www_bget?sot:102586091	ZIP2	Zinc/iron permease
106	PGSC0003DMG400002163	380.499	79.2886	2.2627	5.054e-09	3.276e-07	UP	--	--	--	--	--	--	K00799 glutathione S-transferase [EC:2.5.1.18] | (RefSeq) probable glutathione S-transferase	http://www.genome.jp/dbget-bin/www_bget?sot:102598723	-	Glutathione S-transferase, N-terminal||Thioredoxin-like fold||Glutathione S-transferase, C-terminal||Glutathione S-transferase, C-terminal-like
107	PGSC0003DMG400002175	70.2558	15.6072	2.1704	0.0024548	0.023207	UP	--	--	--	--	--	--	K00799 glutathione S-transferase [EC:2.5.1.18] | (RefSeq) probable glutathione S-transferase	http://www.genome.jp/dbget-bin/www_bget?sot:102601040	-	Glutathione S-transferase, C-terminal-like||Thioredoxin-like fold||Glutathione S-transferase, N-terminal||Glutathione S-transferase, C-terminal
108	PGSC0003DMG400002190	1571.89	163.849	3.2621	0.001529	0.01619	UP	GO:1901360//GO:0006139//GO:0044237//GO:0051276//GO:0006270//GO:0008152//GO:0006268//GO:0044260//GO:1901576//GO:0009059//GO:0034645//GO:0043170//GO:0071704//GO:0006725//GO:0032392//GO:0044249//GO:0034641//GO:0032508//GO:0006259//GO:0008150//GO:0071103//GO:0006261//GO:0006260//GO:0071840//GO:0006996//GO:0009058//GO:0006807//GO:0009987//GO:0044238//GO:0046483//GO:0016043//GO:0090304	organic cyclic compound metabolic process//nucleobase-containing compound metabolic process//cellular metabolic process//chromosome organization//DNA replication initiation//metabolic process//DNA unwinding involved in DNA replication//cellular macromolecule metabolic process//organic substance biosynthetic process//macromolecule biosynthetic process//cellular macromolecule biosynthetic process//…	GO:0044424//GO:0043229//GO:0042555//GO:0043231//GO:0005575//GO:0032991//GO:0043227//GO:0005623//GO:0005634//GO:0005622//GO:0043226//GO:0044464	intracellular part//intracellular organelle//MCM complex//intracellular membrane-bounded organelle//cellular_component//protein-containing complex//membrane-bounded organelle//cell//nucleus//intracellular//organelle//cell part	GO:0032555//GO:0005488//GO:0035639//GO:0032550//GO:0016787//GO:0032549//GO:0016817//GO:0032559//GO:0043168//GO:0005524//GO:0032553//GO:0017076//GO:0036094//GO:0016818//GO:0003674//GO:0097367//GO:1901265//GO:0043167//GO:0001882//GO:1901363//GO:0003676//GO:0000166//GO:0003677//GO:0001883//GO:0003824//GO:0030554//GO:0017111//GO:0004386//GO:0016462//GO:0003678//GO:0097159	purine ribonucleotide binding//binding//purine ribonucleoside triphosphate binding//purine ribonucleoside binding//hydrolase activity//ribonucleoside binding//hydrolase activity, acting on acid anhydrides//adenyl ribonucleotide binding//anion binding//ATP binding//ribonucleotide binding//purine nucleotide binding//small molecule binding//hydrolase activity, acting on acid anhydrides, in phosphoru…	K02540 DNA replication licensing factor MCM2 [EC:3.6.4.12] | (RefSeq) DNA replication licensing factor MCM2	http://www.genome.jp/dbget-bin/www_bget?sot:102589508	MCM2	DNA replication licensing factor Mcm2||MCM N-terminal domain||Nucleic acid-binding, OB-fold||MCM OB domain||P-loop containing nucleoside triphosphate hydrolase||Mini-chromosome maintenance, conserved site||Mini-chromosome maintenance protein||MCM domain
109	PGSC0003DMG400002272	77.0509	0	Inf	1.6467e-13	2.8546e-11	UP	GO:0044271//GO:1901360//GO:0006139//GO:1903506//GO:0044237//GO:0008152//GO:0051252//GO:2001141//GO:0044260//GO:1901576//GO:0009059//GO:0019219//GO:0034645//GO:0006351//GO:0043170//GO:0097659//GO:0071704//GO:0006725//GO:0019222//GO:0044249//GO:0031323//GO:0050789//GO:0034641//GO:0009889//GO:0016070//GO:0065007//GO:0032774//GO:2000112//GO:0010468//GO:0006355//GO:0008150//GO:0031326//GO:0018130//GO:…	cellular nitrogen compound biosynthetic process//organic cyclic compound metabolic process//nucleobase-containing compound metabolic process//regulation of nucleic acid-templated transcription//cellular metabolic process//metabolic process//regulation of RNA metabolic process//regulation of RNA biosynthetic process//cellular macromolecule metabolic process//organic substance biosynthetic process/…	GO:0044424//GO:0043229//GO:0043231//GO:0005575//GO:0043227//GO:0005623//GO:0005634//GO:0005622//GO:0043226//GO:0044464	intracellular part//intracellular organelle//intracellular membrane-bounded organelle//cellular_component//membrane-bounded organelle//cell//nucleus//intracellular//organelle//cell part	GO:0005488//GO:0003674//GO:0003700//GO:1901363//GO:0003676//GO:0003677//GO:0097159	binding//molecular_function//DNA-binding transcription factor activity//heterocyclic compound binding//nucleic acid binding//DNA binding//organic cyclic compound binding	no KO assigned | (RefSeq) ethylene-responsive transcription factor 2-like	http://www.genome.jp/dbget-bin/www_bget?sot:102595148	-	DNA-binding domain||AP2/ERF domain
110	PGSC0003DMG400002275	20.3596	1.14936	4.1468	0.0065457	0.048298	UP	GO:0008150//GO:0006952//GO:0050896//GO:0006950	biological_process//defense response//response to stimulus//response to stress	--	--	GO:0097159//GO:0001882//GO:0001883//GO:0030554//GO:1901363//GO:0000166//GO:0036094//GO:0003674//GO:0017076//GO:1901265//GO:0043167//GO:0097367//GO:0032550//GO:0032559//GO:0032549//GO:0032555//GO:0005488//GO:0043531//GO:0043168//GO:0032553	organic cyclic compound binding//nucleoside binding//purine nucleoside binding//adenyl nucleotide binding//heterocyclic compound binding//nucleotide binding//small molecule binding//molecular_function//purine nucleotide binding//nucleoside phosphate binding//ion binding//carbohydrate derivative binding//purine ribonucleoside binding//adenyl ribonucleotide binding//ribonucleoside binding//purine r…	K13459 disease resistance protein RPS2 | (RefSeq) disease resistance protein At4g27190-like	http://www.genome.jp/dbget-bin/www_bget?sot:102587424	-	Leucine-rich repeat domain, L domain-like||NB-ARC||P-loop containing nucleoside triphosphate hydrolase||Winged helix-turn-helix DNA-binding domain||AAA+ ATPase domain
111	PGSC0003DMG400002473	56.3988	0.619745	6.5078	1.4956e-05	0.00037008	UP	GO:0019752//GO:0008150//GO:1901564//GO:0006536//GO:0043436//GO:0044238//GO:0009987//GO:0044281//GO:0006082//GO:0006807//GO:0044237//GO:0008152//GO:0009064//GO:0071704//GO:1901605//GO:0043648//GO:0006520	carboxylic acid metabolic process//biological_process//organonitrogen compound metabolic process//glutamate metabolic process//oxoacid metabolic process//primary metabolic process//cellular process//small molecule metabolic process//organic acid metabolic process//nitrogen compound metabolic process//cellular metabolic process//metabolic process//glutamine family amino acid metabolic process//org…	--	--	GO:1901363//GO:0003824//GO:0097159//GO:0004351//GO:0016830//GO:0016829//GO:0043168//GO:0005488//GO:0016831//GO:0030170//GO:0043167//GO:0048037//GO:0003674	heterocyclic compound binding//catalytic activity//organic cyclic compound binding//glutamate decarboxylase activity//carbon-carbon lyase activity//lyase activity//anion binding//binding//carboxy-lyase activity//pyridoxal phosphate binding//ion binding//cofactor binding//molecular_function	K01580 glutamate decarboxylase [EC:4.1.1.15] | (RefSeq) glutamate decarboxylase 4-like	http://www.genome.jp/dbget-bin/www_bget?sot:102581196	-	Pyridoxal phosphate-dependent decarboxylase||Pyridoxal phosphate-dependent transferase||Glutamate decarboxylase
112	PGSC0003DMG400002539	926.023	409.477	1.1773	5.6741e-05	0.0011479	UP	GO:0007017//GO:0007018//GO:1903338//GO:0016049//GO:0006928//GO:0050794//GO:0065007//GO:0008150//GO:0050789//GO:0071554//GO:0009987//GO:0040007	microtubule-based process//microtubule-based movement//regulation of cell wall organization or biogenesis//cell growth//movement of cell or subcellular component//regulation of cellular process//biological regulation//biological_process//regulation of biological process//cell wall organization or biogenesis//cellular process//growth	GO:0071944//GO:0044424//GO:0005874//GO:0043232//GO:0015630//GO:0043227//GO:0016020//GO:0005886//GO:0032991//GO:0043231//GO:0005575//GO:0043229//GO:0044446//GO:0044422//GO:0005623//GO:0044430//GO:0005856//GO:0043228//GO:0043226//GO:0044464//GO:0005634//GO:0005622	cell periphery//intracellular part//microtubule//intracellular non-membrane-bounded organelle//microtubule cytoskeleton//membrane-bounded organelle//membrane//plasma membrane//protein-containing complex//intracellular membrane-bounded organelle//cellular_component//intracellular organelle//intracellular organelle part//organelle part//cell//cytoskeletal part//cytoskeleton//non-membrane-bounded or…	GO:0005524//GO:0043168//GO:0032553//GO:0008092//GO:0032550//GO:0016787//GO:0008017//GO:0032559//GO:0032549//GO:0016817//GO:0032555//GO:0005488//GO:0035639//GO:0003774//GO:0043167//GO:1901265//GO:0003777//GO:0097367//GO:0036094//GO:0016818//GO:0003674//GO:0017076//GO:0015631//GO:0001883//GO:0030554//GO:0003824//GO:1901363//GO:0000166//GO:0001882//GO:0097159//GO:0044877//GO:0016462//GO:0017111//GO:…	ATP binding//anion binding//ribonucleotide binding//cytoskeletal protein binding//purine ribonucleoside binding//hydrolase activity//microtubule binding//adenyl ribonucleotide binding//ribonucleoside binding//hydrolase activity, acting on acid anhydrides//purine ribonucleotide binding//binding//purine ribonucleoside triphosphate binding//motor activity//ion binding//nucleoside phosphate binding//…	K10393 kinesin family member 2/24 | (RefSeq) kinesin-13A	http://www.genome.jp/dbget-bin/www_bget?sot:102584807	-	Kinesin motor domain||Kinesin motor domain, conserved site||P-loop containing nucleoside triphosphate hydrolase
113	PGSC0003DMG400002658	85.7431	15.2033	2.4956	9.0497e-05	0.0016886	UP	--	--	GO:0044425//GO:0016020//GO:0005575//GO:0016021//GO:0031224	membrane part//membrane//cellular_component//integral component of membrane//intrinsic component of membrane	--	--	no KO assigned | (RefSeq) uncharacterized LOC102582579	http://www.genome.jp/dbget-bin/www_bget?sot:102582579	-	Alpha/beta hydrolase fold-1||Alpha/Beta hydrolase fold
114	PGSC0003DMG400002664	68.8577	12.0921	2.5095	0.00044663	0.0060947	UP	GO:0009987//GO:0044238//GO:0006468//GO:0036211//GO:0006796//GO:0019538//GO:0043412//GO:0044267//GO:0008150//GO:0043170//GO:0071704//GO:0016310//GO:0006464//GO:0044260//GO:0044237//GO:0008152//GO:0006793	cellular process//primary metabolic process//protein phosphorylation//protein modification process//phosphate-containing compound metabolic process//protein metabolic process//macromolecule modification//cellular protein metabolic process//biological_process//macromolecule metabolic process//organic substance metabolic process//phosphorylation//cellular protein modification process//cellular macr…	--	--	GO:0097159//GO:0016773//GO:0000166//GO:1901363//GO:0003824//GO:0030554//GO:0001883//GO:0004672//GO:0001882//GO:0016772//GO:0016740//GO:0097367//GO:1901265//GO:0043167//GO:0017076//GO:0003674//GO:0036094//GO:0016301//GO:0032553//GO:0043168//GO:0005524//GO:0035639//GO:0032555//GO:0005488//GO:0032549//GO:0032559//GO:0032550	organic cyclic compound binding//phosphotransferase activity, alcohol group as acceptor//nucleotide binding//heterocyclic compound binding//catalytic activity//adenyl nucleotide binding//purine nucleoside binding//protein kinase activity//nucleoside binding//transferase activity, transferring phosphorus-containing groups//transferase activity//carbohydrate derivative binding//nucleoside phosphate…	no KO assigned | (RefSeq) serine/threonine-protein kinase KIPK-like	http://www.genome.jp/dbget-bin/www_bget?sot:102586543	-	Serine/threonine-protein kinase, active site||Protein kinase domain||Protein kinase-like domain
115	PGSC0003DMG400002686	559.361	266.95	1.0672	0.00091414	0.010894	UP	--	--	--	--	--	--	no KO assigned | (RefSeq) uncharacterized LOC102598109	http://www.genome.jp/dbget-bin/www_bget?sot:102598109	-	Protein of unknown function DUF668||Protein of unknown function DUF3475
116	PGSC0003DMG400002703	24279.7	11453.9	1.0839	3.062e-05	0.00068441	UP	GO:0008150//GO:0055114//GO:0008152	biological_process//oxidation-reduction process//metabolic process	--	--	GO:0003824//GO:0000166//GO:1901363//GO:0016491//GO:0097159//GO:0050660//GO:0050662//GO:0043168//GO:0005488//GO:0043167//GO:1901265//GO:0003674//GO:0048037//GO:0036094	catalytic activity//nucleotide binding//heterocyclic compound binding//oxidoreductase activity//organic cyclic compound binding//flavin adenine dinucleotide binding//coenzyme binding//anion binding//binding//ion binding//nucleoside phosphate binding//molecular_function//cofactor binding//small molecule binding	K08232 monodehydroascorbate reductase (NADH) [EC:1.6.5.4] | (RefSeq) monodehydroascorbate reductase	http://www.genome.jp/dbget-bin/www_bget?sot:102586212	ATMDAR1	FAD/NAD(P)-binding domain||Pyridine nucleotide-disulphide oxidoreductase, class-II||FAD/NAD-linked reductase, dimerisation domain
117	PGSC0003DMG400002730	5079.15	1351.63	1.9099	9.7167e-09	5.9007e-07	UP	--	--	GO:0031224//GO:0044425//GO:0005575//GO:0016021//GO:0016020	intrinsic component of membrane//membrane part//cellular_component//integral component of membrane//membrane	--	--	no KO assigned | (RefSeq) uncharacterized LOC102602443	http://www.genome.jp/dbget-bin/www_bget?sot:102602443	-	Transmembrane protein TauE-like
118	PGSC0003DMG400002758	180.735	73.069	1.3065	0.002749	0.025189	UP	--	--	--	--	--	--	no KO assigned | (RefSeq) uncharacterized LOC102580710	http://www.genome.jp/dbget-bin/www_bget?sot:102580710	-	Agenet-like domain||Agenet domain, plant type
119	PGSC0003DMG400002776	16369.2	6640.78	1.3016	1.0093e-06	3.5955e-05	UP	GO:0009987//GO:0044238//GO:0019538//GO:0006457//GO:0044267//GO:0008150//GO:0043170//GO:0071704//GO:0044260//GO:0008152//GO:0044237	cellular process//primary metabolic process//protein metabolic process//protein folding//cellular protein metabolic process//biological_process//macromolecule metabolic process//organic substance metabolic process//cellular macromolecule metabolic process//metabolic process//cellular metabolic process	GO:0012505//GO:0043226//GO:0044464//GO:0005622//GO:0044444//GO:0005623//GO:0005783//GO:0043227//GO:0043231//GO:0005575//GO:0043229//GO:0005737//GO:0044424	endomembrane system//organelle//cell part//intracellular//cytoplasmic part//cell//endoplasmic reticulum//membrane-bounded organelle//intracellular membrane-bounded organelle//cellular_component//intracellular organelle//cytoplasm//intracellular part	GO:0043169//GO:0005515//GO:0043167//GO:0046872//GO:0003674//GO:0051082//GO:0005488//GO:0005509	cation binding//protein binding//ion binding//metal ion binding//molecular_function//unfolded protein binding//binding//calcium ion binding	K08057 calreticulin | (RefSeq) calreticulin	http://www.genome.jp/dbget-bin/www_bget?sot:102603479	-	Calreticulin/calnexin, P domain||Calreticulin||Concanavalin A-like lectin/glucanase domain||Calreticulin/calnexin||Calreticulin/calnexin, conserved site
120	PGSC0003DMG400002807	464.373	161.695	1.522	0.0028835	0.026125	UP	--	--	--	--	--	--	no KO assigned | (RefSeq) uncharacterized LOC102600562	http://www.genome.jp/dbget-bin/www_bget?sot:102600562	-	DUF3741-associated sequence motif||Domain of unknown function DUF4378
121	PGSC0003DMG400002820	1293.12	622.534	1.0546	0.0039392	0.033226	UP	--	--	--	--	GO:0017076//GO:0036094//GO:0003674//GO:0097367//GO:0043167//GO:1901265//GO:0005488//GO:0032555//GO:0043531//GO:0032550//GO:0032549//GO:0032559//GO:0043168//GO:0032553//GO:0097159//GO:0001882//GO:1901363//GO:0000166//GO:0001883//GO:0030554	purine nucleotide binding//small molecule binding//molecular_function//carbohydrate derivative binding//ion binding//nucleoside phosphate binding//binding//purine ribonucleotide binding//ADP binding//purine ribonucleoside binding//ribonucleoside binding//adenyl ribonucleotide binding//anion binding//ribonucleotide binding//organic cyclic compound binding//nucleoside binding//heterocyclic compound…	--	--	-	Winged helix-turn-helix DNA-binding domain||P-loop containing nucleoside triphosphate hydrolase||NB-ARC
122	PGSC0003DMG400002879	471.13	189.398	1.3147	0.0055648	0.042919	UP	--	--	GO:0031224//GO:0005575//GO:0016021//GO:0016020//GO:0044425	intrinsic component of membrane//cellular_component//integral component of membrane//membrane//membrane part	--	--	K07297 adiponectin receptor | (RefSeq) heptahelical transmembrane protein 1-like	http://www.genome.jp/dbget-bin/www_bget?sot:102588217	-	AdipoR/Haemolysin-III-related
123	PGSC0003DMG400002885	571.607	232.274	1.2992	6.3719e-05	0.0012632	UP	--	--	GO:0016020//GO:0005575//GO:0016021//GO:0044425//GO:0031224	membrane//cellular_component//integral component of membrane//membrane part//intrinsic component of membrane	--	--	no KO assigned | (RefSeq) receptor-like protein 12	http://www.genome.jp/dbget-bin/www_bget?sot:102589859	-	Leucine-rich repeat||Leucine-rich repeat-containing N-terminal, plant-type||Leucine-rich repeat, typical subtype||Leucine-rich repeat domain, L domain-like
124	PGSC0003DMG400002903	1423.04	685.062	1.0547	0.00025574	0.0038912	UP	--	--	--	--	--	--	K09705 uncharacterized protein | (RefSeq) uncharacterized LOC102581389	http://www.genome.jp/dbget-bin/www_bget?sot:102581389	-	RmlC-like jelly roll fold||RmlC-like cupin domain||Cupin domain of unknown function DUF985
125	PGSC0003DMG400002930	1755.03	357.651	2.2949	0.0020931	0.020509	UP	--	--	--	--	--	--	K13464 jasmonate ZIM domain-containing protein | (RefSeq) protein TIFY 10A	http://www.genome.jp/dbget-bin/www_bget?sot:102580049	-	CO/COL/TOC1, conserved site||Tify domain
126	PGSC0003DMG400003124	223.275	90.1328	1.3087	0.001584	0.016607	UP	GO:0030243//GO:0016052//GO:0005975//GO:0044260//GO:0044275//GO:0044247//GO:0044042//GO:0044262//GO:0071704//GO:0043170//GO:0008152//GO:0030245//GO:0044237//GO:0044264//GO:0009056//GO:1901575//GO:0005976//GO:0044248//GO:0009057//GO:0044238//GO:0009987//GO:0006073//GO:0008150//GO:0009251//GO:0051273//GO:0051275//GO:0000272	cellulose metabolic process//carbohydrate catabolic process//carbohydrate metabolic process//cellular macromolecule metabolic process//cellular carbohydrate catabolic process//cellular polysaccharide catabolic process//glucan metabolic process//cellular carbohydrate metabolic process//organic substance metabolic process//macromolecule metabolic process//metabolic process//cellulose catabolic proc…	--	--	GO:0003674//GO:0016798//GO:0016787//GO:0004553//GO:0008810//GO:0003824	molecular_function//hydrolase activity, acting on glycosyl bonds//hydrolase activity//hydrolase activity, hydrolyzing O-glycosyl compounds//cellulase activity//catalytic activity	K01179 endoglucanase [EC:3.2.1.4] | (RefSeq) endoglucanase 24-like	http://www.genome.jp/dbget-bin/www_bget?sot:102579821	-	Glycoside hydrolase family 9||Six-hairpin glycosidase-like||Glycosyl hydrolases family 9, Asp/Glu active sites
127	PGSC0003DMG400003193	902.446	367.029	1.2979	1.3698e-05	0.00034439	UP	GO:0050896//GO:0006952//GO:0008150//GO:0009607//GO:0006950	response to stimulus//defense response//biological_process//response to biotic stimulus//response to stress	--	--	--	--	no KO assigned | (RefSeq) S-norcoclaurine synthase 2-like	http://www.genome.jp/dbget-bin/www_bget?sot:102593760	-	START-like domain||Bet v I/Major latex protein
128	PGSC0003DMG400003195	152.81	47.0123	1.7006	0.00030861	0.0045019	UP	--	--	GO:0031224//GO:0016021//GO:0005575//GO:0016020//GO:0044425	intrinsic component of membrane//integral component of membrane//cellular_component//membrane//membrane part	--	--	no KO assigned | (RefSeq) receptor-like protein 12	http://www.genome.jp/dbget-bin/www_bget?sot:102589525	-	Leucine-rich repeat||Leucine-rich repeat, typical subtype||Leucine-rich repeat domain, L domain-like
129	PGSC0003DMG400003289	123.459	18.1966	2.7623	0.00073183	0.0091187	UP	GO:0008150//GO:0055114//GO:0008152	biological_process//oxidation-reduction process//metabolic process	--	--	GO:1901363//GO:0020037//GO:0003824//GO:0016491//GO:0016705//GO:0043169//GO:0097159//GO:0046914//GO:0046906//GO:0005488//GO:0005506//GO:0004497//GO:0046872//GO:0043167//GO:0003674	heterocyclic compound binding//heme binding//catalytic activity//oxidoreductase activity//oxidoreductase activity, acting on paired donors, with incorporation or reduction of molecular oxygen//cation binding//organic cyclic compound binding//transition metal ion binding//tetrapyrrole binding//binding//iron ion binding//monooxygenase activity//metal ion binding//ion binding//molecular_function	K09754 coumaroylquinate(coumaroylshikimate) 3'-monooxygenase [EC:1.14.13.36] | (RefSeq) cytochrome P450 98A2-like	http://www.genome.jp/dbget-bin/www_bget?sot:102590870	CYP98A3	Cytochrome P450||Cytochrome P450, conserved site||Cytochrome P450, E-class, group I
130	PGSC0003DMG400003308	13.6508	0	Inf	0.0041325	0.03437	UP	GO:0008152//GO:0055114//GO:0008150	metabolic process//oxidation-reduction process//biological_process	GO:0016021//GO:0005575//GO:0016020//GO:0044425//GO:0031224	integral component of membrane//cellular_component//membrane//membrane part//intrinsic component of membrane	GO:0003674//GO:0046872//GO:0043167//GO:0005488//GO:0005506//GO:0004497//GO:0046906//GO:0046914//GO:0043169//GO:0097159//GO:0016491//GO:0016705//GO:0020037//GO:1901363//GO:0003824	molecular_function//metal ion binding//ion binding//binding//iron ion binding//monooxygenase activity//tetrapyrrole binding//transition metal ion binding//cation binding//organic cyclic compound binding//oxidoreductase activity//oxidoreductase activity, acting on paired donors, with incorporation or reduction of molecular oxygen//heme binding//heterocyclic compound binding//catalytic activity	no KO assigned | (RefSeq) isoflavone 2'-hydroxylase-like	http://www.genome.jp/dbget-bin/www_bget?sot:102580069	-	Cytochrome P450, E-class, group I||Cytochrome P450||Cytochrome P450, conserved site
131	PGSC0003DMG400003369	4776.54	2348.65	1.0241	0.0010398	0.012013	UP	--	--	--	--	--	--	no KO assigned | (RefSeq) uncharacterized LOC102600787	http://www.genome.jp/dbget-bin/www_bget?sot:102600787	--	--
132	PGSC0003DMG400003410	1106.17	411.995	1.4249	0.0014546	0.015551	UP	--	--	--	--	--	--	K11498 centromeric protein E | (RefSeq) kinesin-related protein 11-like	http://www.genome.jp/dbget-bin/www_bget?sot:102578372	-	Zinc finger, RING-type||Zinc finger, RING/FYVE/PHD-type
133	PGSC0003DMG400003491	143.108	27.7983	2.364	0.0049395	0.039181	UP	--	--	GO:0005575//GO:0016021//GO:0016020//GO:0044425//GO:0031224	cellular_component//integral component of membrane//membrane//membrane part//intrinsic component of membrane	--	--	no KO assigned | (RefSeq) uncharacterized LOC102597124	http://www.genome.jp/dbget-bin/www_bget?sot:102597124	--	--
134	PGSC0003DMG400003521	188.645	28.7374	2.7147	0.0011591	0.013047	UP	GO:0071704//GO:0005975//GO:0008152//GO:0044238//GO:0008150	organic substance metabolic process//carbohydrate metabolic process//metabolic process//primary metabolic process//biological_process	--	--	GO:0003674//GO:0004553//GO:0016787//GO:0016798//GO:0003824	molecular_function//hydrolase activity, hydrolyzing O-glycosyl compounds//hydrolase activity//hydrolase activity, acting on glycosyl bonds//catalytic activity	K19355 mannan endo-1,4-beta-mannosidase [EC:3.2.1.78] | (RefSeq) mannan endo-1,4-beta-mannosidase 7-like	http://www.genome.jp/dbget-bin/www_bget?sot:102588957	-	Glycoside hydrolase superfamily||Glycoside hydrolase, family 5
135	PGSC0003DMG400003568	959.497	388.166	1.3056	0.00052517	0.006938	UP	GO:1901362//GO:0080090//GO:0090304//GO:0044238//GO:0046483//GO:0009987//GO:0051171//GO:0009058//GO:0006807//GO:0010467//GO:0060255//GO:0010556//GO:0019438//GO:0034654//GO:0050794//GO:0018130//GO:0032774//GO:2000112//GO:0010468//GO:0065007//GO:0008150//GO:0031326//GO:0006355//GO:0050789//GO:0044249//GO:0031323//GO:0016070//GO:0034641//GO:0009889//GO:0006725//GO:0019222//GO:0097659//GO:0071704//GO:…	organic cyclic compound biosynthetic process//regulation of primary metabolic process//nucleic acid metabolic process//primary metabolic process//heterocycle metabolic process//cellular process//regulation of nitrogen compound metabolic process//biosynthetic process//nitrogen compound metabolic process//gene expression//regulation of macromolecule metabolic process//regulation of macromolecule bi…	--	--	GO:0097159//GO:0043169//GO:0046914//GO:1901363//GO:0003677//GO:0003676//GO:0043167//GO:0046872//GO:0003674//GO:0008270//GO:0005488	organic cyclic compound binding//cation binding//transition metal ion binding//heterocyclic compound binding//DNA binding//nucleic acid binding//ion binding//metal ion binding//molecular_function//zinc ion binding//binding	K09250 cellular nucleic acid-binding protein | (RefSeq) cold shock domain-containing protein 3-like	http://www.genome.jp/dbget-bin/www_bget?sot:102591723	-	Nucleic acid-binding, OB-fold||Cold shock domain||Cold-shock conserved site||Zinc finger, CCHC-type||Cold-shock protein, DNA-binding
136	PGSC0003DMG400003673	95.7977	12.9396	2.8882	2.4167e-06	7.6413e-05	UP	GO:0009719//GO:0009733//GO:0010033//GO:0009725//GO:0050896//GO:0008150//GO:0042221	response to endogenous stimulus//response to auxin//response to organic substance//response to hormone//response to stimulus//biological_process//response to chemical	--	--	--	--	K14488 SAUR family protein | (RefSeq) auxin-induced protein 15A-like	http://www.genome.jp/dbget-bin/www_bget?sot:102586210	-	Small auxin-up RNA
137	PGSC0003DMG400003701	2061.89	1007.83	1.0327	0.00019117	0.0030895	UP	GO:0008152//GO:0051252//GO:0044237//GO:0044271//GO:1903506//GO:1901360//GO:0006139//GO:0006725//GO:0019222//GO:0097659//GO:0071704//GO:0006351//GO:0034645//GO:0043170//GO:0009059//GO:0019219//GO:0044260//GO:1901576//GO:2001141//GO:0060255//GO:0010556//GO:0019438//GO:0034654//GO:0050794//GO:0018130//GO:2000112//GO:0032774//GO:0010468//GO:0065007//GO:0008150//GO:0031326//GO:0006355//GO:0050789//GO:…	metabolic process//regulation of RNA metabolic process//cellular metabolic process//cellular nitrogen compound biosynthetic process//regulation of nucleic acid-templated transcription//organic cyclic compound metabolic process//nucleobase-containing compound metabolic process//cellular aromatic compound metabolic process//regulation of metabolic process//nucleic acid-templated transcription//orga…	--	--	GO:0003700//GO:0003674	DNA-binding transcription factor activity//molecular_function	no KO assigned | (RefSeq) bZIP transcription factor 53-like	http://www.genome.jp/dbget-bin/www_bget?sot:102602332	AtbZIP44	Basic-leucine zipper domain
138	PGSC0003DMG400003739	496.044	11.7595	5.3986	0.0007183	0.0089725	UP	--	--	GO:0031224//GO:0044425//GO:0005575//GO:0016021//GO:0016020	intrinsic component of membrane//membrane part//cellular_component//integral component of membrane//membrane	--	--	--	--	--	--
139	PGSC0003DMG400003754	314.179	1.81744	7.4335	1.2458e-13	2.2243e-11	UP	GO:0044237//GO:0008152//GO:0042445//GO:0010817//GO:0071704//GO:0034754//GO:0009690//GO:0006725//GO:0065008//GO:0009308//GO:0065007//GO:1901564//GO:0008150//GO:0046483//GO:0009987//GO:0006807//GO:0055114	cellular metabolic process//metabolic process//hormone metabolic process//regulation of hormone levels//organic substance metabolic process//cellular hormone metabolic process//cytokinin metabolic process//cellular aromatic compound metabolic process//regulation of biological quality//amine metabolic process//biological regulation//organonitrogen compound metabolic process//biological_process//he…	--	--	GO:0043168//GO:0005488//GO:0016614//GO:1901265//GO:0043167//GO:0036094//GO:0048037//GO:0003674//GO:1901363//GO:0016645//GO:0000166//GO:0003824//GO:0016491//GO:0019139//GO:0050662//GO:0050660//GO:0097159	anion binding//binding//oxidoreductase activity, acting on CH-OH group of donors//nucleoside phosphate binding//ion binding//small molecule binding//cofactor binding//molecular_function//heterocyclic compound binding//oxidoreductase activity, acting on the CH-NH group of donors//nucleotide binding//catalytic activity//oxidoreductase activity//cytokinin dehydrogenase activity//coenzyme binding//fl…	K00279 cytokinin dehydrogenase [EC:1.5.99.12] | (RefSeq) CKX4; cytokinin oxidase/dehydrogenase	http://www.genome.jp/dbget-bin/www_bget?sot:102577731	CKX5	CO dehydrogenase flavoprotein-like, FAD-binding, subdomain 2||Cytokinin dehydrogenase 1, FAD/cytokinin binding domain||FAD-binding, type 2||FAD linked oxidase, N-terminal||FAD-linked oxidase-like, C-terminal||Oxygen oxidoreductase covalent FAD-binding site||Vanillyl-alcohol oxidase/Cytokinin dehydrogenase C-terminal domain||FAD-binding, type 2, subdomain 1
140	PGSC0003DMG400003813	1704.15	741.469	1.2006	3.2327e-05	0.00071718	UP	GO:0006793//GO:0008152//GO:0044237//GO:0006464//GO:0044260//GO:0016310//GO:0043170//GO:0071704//GO:0008150//GO:0044267//GO:0043412//GO:0019538//GO:0006796//GO:0036211//GO:0009987//GO:0006468//GO:0044238	phosphorus metabolic process//metabolic process//cellular metabolic process//cellular protein modification process//cellular macromolecule metabolic process//phosphorylation//macromolecule metabolic process//organic substance metabolic process//biological_process//cellular protein metabolic process//macromolecule modification//protein metabolic process//phosphate-containing compound metabolic pro…	--	--	GO:0032550//GO:0032549//GO:0032559//GO:0005488//GO:0032555//GO:0035639//GO:0043168//GO:0005524//GO:0032553//GO:0016301//GO:0036094//GO:0003674//GO:0017076//GO:0043167//GO:1901265//GO:0097367//GO:0016772//GO:0016740//GO:0001882//GO:0004672//GO:0001883//GO:0003824//GO:0030554//GO:1901363//GO:0000166//GO:0016773//GO:0097159//GO:0004674	purine ribonucleoside binding//ribonucleoside binding//adenyl ribonucleotide binding//binding//purine ribonucleotide binding//purine ribonucleoside triphosphate binding//anion binding//ATP binding//ribonucleotide binding//kinase activity//small molecule binding//molecular_function//purine nucleotide binding//ion binding//nucleoside phosphate binding//carbohydrate derivative binding//transferase a…	K04733 interleukin-1 receptor-associated kinase 4 [EC:2.7.11.1] | (RefSeq) receptor-like cytosolic serine/threonine-protein kinase RBK2	http://www.genome.jp/dbget-bin/www_bget?sot:102578687	-	Serine/threonine-protein kinase, active site||Protein kinase, ATP binding site||Protein kinase domain||Protein kinase-like domain||Serine-threonine/tyrosine-protein kinase, catalytic domain
141	PGSC0003DMG400003820	15.2583	0	Inf	0.0024752	0.023333	UP	GO:0051179//GO:0008150//GO:0006810//GO:0051234	localization//biological_process//transport//establishment of localization	GO:0016021//GO:0005575//GO:0016020//GO:0044425//GO:0031224	integral component of membrane//cellular_component//membrane//membrane part//intrinsic component of membrane	GO:0003674//GO:0005215	molecular_function//transporter activity	K14638 solute carrier family 15 (peptide/histidine transporter), member 3/4 | (RefSeq) protein NRT1/ PTR FAMILY 5.2-like	http://www.genome.jp/dbget-bin/www_bget?sot:102596266	-	Proton-dependent oligopeptide transporter family||Major facilitator superfamily domain
142	PGSC0003DMG400003866	58.7035	0.86039	6.0923	0.0042719	0.035225	UP	GO:0044085//GO:0008150//GO:0016043//GO:0044248//GO:0005976//GO:0010410//GO:0071554//GO:0009987//GO:0006073//GO:0044238//GO:0071555//GO:0009056//GO:0071840//GO:0010383//GO:0045229//GO:0008152//GO:0044264//GO:0044237//GO:0044036//GO:0016998//GO:0044042//GO:0010411//GO:0044262//GO:0043170//GO:0071704//GO:0005975//GO:0042546//GO:0044260	cellular component biogenesis//biological_process//cellular component organization//cellular catabolic process//polysaccharide metabolic process//hemicellulose metabolic process//cell wall organization or biogenesis//cellular process//cellular glucan metabolic process//primary metabolic process//cell wall organization//catabolic process//cellular component organization or biogenesis//cell wall po…	GO:0005623//GO:0005618//GO:0044464//GO:0005576//GO:0071944//GO:0030312//GO:0048046//GO:0005575	cell//cell wall//cell part//extracellular region//cell periphery//external encapsulating structure//apoplast//cellular_component	GO:0003824//GO:0016740//GO:0016762//GO:0004553//GO:0016798//GO:0016787//GO:0016758//GO:0003674//GO:0016757	catalytic activity//transferase activity//xyloglucan:xyloglucosyl transferase activity//hydrolase activity, hydrolyzing O-glycosyl compounds//hydrolase activity, acting on glycosyl bonds//hydrolase activity//transferase activity, transferring hexosyl groups//molecular_function//transferase activity, transferring glycosyl groups	K08235 xyloglucan:xyloglucosyl transferase [EC:2.4.1.207] | (RefSeq) probable xyloglucan endotransglucosylase/hydrolase protein 32	http://www.genome.jp/dbget-bin/www_bget?sot:102580643	XTH32	Xyloglucan endotransglucosylase/hydrolase||Xyloglucan endo-transglycosylase, C-terminal||Glycoside hydrolase family 16||Concanavalin A-like lectin/glucanase domain
143	PGSC0003DMG400003871	29.1983	0	Inf	0.0024602	0.02325	UP	GO:0071704//GO:0043170//GO:0016052//GO:0005975//GO:0008152//GO:0045490//GO:0044238//GO:0010393//GO:0005976//GO:0009057//GO:0045488//GO:0009056//GO:1901575//GO:0000272//GO:0008150	organic substance metabolic process//macromolecule metabolic process//carbohydrate catabolic process//carbohydrate metabolic process//metabolic process//pectin catabolic process//primary metabolic process//galacturonan metabolic process//polysaccharide metabolic process//macromolecule catabolic process//pectin metabolic process//catabolic process//organic substance catabolic process//polysacchari…	--	--	GO:0046872//GO:0043167//GO:0016835//GO:0003674//GO:0016829//GO:0016837//GO:0005488//GO:0043169//GO:0003824//GO:0030570	metal ion binding//ion binding//carbon-oxygen lyase activity//molecular_function//lyase activity//carbon-oxygen lyase activity, acting on polysaccharides//binding//cation binding//catalytic activity//pectate lyase activity	K01728 pectate lyase [EC:4.2.2.2] | (RefSeq) probable pectate lyase 12	http://www.genome.jp/dbget-bin/www_bget?sot:102590902	-	Pectin lyase fold||Pectin lyase fold/virulence factor||AmbAllergen||Pectate lyase
144	PGSC0003DMG400003901	496.324	98.1456	2.3383	0.00019057	0.0030832	UP	GO:0008150//GO:0008152	biological_process//metabolic process	--	--	GO:0003824//GO:0016740//GO:0016758//GO:0003674//GO:0016757	catalytic activity//transferase activity//transferase activity, transferring hexosyl groups//molecular_function//transferase activity, transferring glycosyl groups	K13496 UDP-glucosyl transferase 73C [EC:2.4.1.-] | (RefSeq) UDP-glycosyltransferase 73C1-like	http://www.genome.jp/dbget-bin/www_bget?sot:102592932	-	UDP-glucuronosyl/UDP-glucosyltransferase||UDP-glycosyltransferase family, conserved site
145	PGSC0003DMG400003912	434.197	72.6796	2.5787	0.0058678	0.044553	UP	GO:0019538//GO:0044238//GO:0008150//GO:0043170//GO:0071704//GO:0006508//GO:0008152	protein metabolic process//primary metabolic process//biological_process//macromolecule metabolic process//organic substance metabolic process//proteolysis//metabolic process	--	--	GO:0070011//GO:0017171//GO:0003824//GO:0003674//GO:0008233//GO:0008236//GO:0004175//GO:0016787//GO:0004252	peptidase activity, acting on L-amino acid peptides//serine hydrolase activity//catalytic activity//molecular_function//peptidase activity//serine-type peptidase activity//endopeptidase activity//hydrolase activity//serine-type endopeptidase activity	no KO assigned | (RefSeq) subtilisin-like protease SBT1.7	http://www.genome.jp/dbget-bin/www_bget?sot:102597175	-	Cucumisin-like catalytic domain||Immunoglobulin-like fold||Peptidase S8/S53 domain||PA domain||Peptidase S8, subtilisin, Asp-active site||Peptidase S8, subtilisin-related||Peptidase S8 propeptide/proteinase inhibitor I9
146	PGSC0003DMG400003931	383.186	97.3548	1.9767	2.9042e-06	8.9828e-05	UP	--	--	--	--	GO:0003674//GO:0005488//GO:0097159//GO:1901363//GO:0003676	molecular_function//binding//organic cyclic compound binding//heterocyclic compound binding//nucleic acid binding	no KO assigned | (RefSeq) uncharacterized LOC102606051	http://www.genome.jp/dbget-bin/www_bget?sot:102606051	-	Ribonuclease H-like domain||Domain of unknown function DUF659
147	PGSC0003DMG400003938	649.227	148.599	2.1273	3.9654e-10	3.3976e-08	UP	GO:0043170//GO:0071704//GO:0008152//GO:0006508//GO:0044238//GO:0019538//GO:0008150	macromolecule metabolic process//organic substance metabolic process//metabolic process//proteolysis//primary metabolic process//protein metabolic process//biological_process	--	--	GO:0008236//GO:0003674//GO:0008233//GO:0004252//GO:0004175//GO:0016787//GO:0070011//GO:0003824//GO:0017171	serine-type peptidase activity//molecular_function//peptidase activity//serine-type endopeptidase activity//endopeptidase activity//hydrolase activity//peptidase activity, acting on L-amino acid peptides//catalytic activity//serine hydrolase activity	--	--	-	Peptidase S8/S53 domain||Peptidase S8, subtilisin, Asp-active site||Peptidase S8 propeptide/proteinase inhibitor I9||Peptidase S8, subtilisin-related
148	PGSC0003DMG400003993	6368.81	466.426	3.7713	7.5562e-11	7.8631e-09	UP	--	--	--	--	--	--	no KO assigned | (RefSeq) citrate-binding protein-like	http://www.genome.jp/dbget-bin/www_bget?sot:102594787	-	Alginate lyase 2||Concanavalin A-like lectin/glucanase domain
149	PGSC0003DMG400004007	625.91	292.082	1.0996	0.0023221	0.022242	UP	--	--	--	--	--	--	no KO assigned | (RefSeq) filament-like plant protein 7	http://www.genome.jp/dbget-bin/www_bget?sot:102582910	-	Filament-like plant protein
150	PGSC0003DMG400004087	359.769	177.193	1.0217	0.0030983	0.027634	UP	--	--	--	--	GO:0005488//GO:0003674//GO:0046983//GO:0005515	binding//molecular_function//protein dimerization activity//protein binding	no KO assigned | (RefSeq) transcription factor bHLH35	http://www.genome.jp/dbget-bin/www_bget?sot:102606395	-	Myc-type, basic helix-loop-helix (bHLH) domain
151	PGSC0003DMG400004253	610.52	248.575	1.2964	5.2412e-05	0.0010726	UP	GO:0046165//GO:0016126//GO:0006066//GO:1901576//GO:0044255//GO:0071704//GO:1901360//GO:0008152//GO:0016125//GO:0044237//GO:0008610//GO:0009058//GO:0044281//GO:1901362//GO:0008299//GO:0009987//GO:0044238//GO:0006720//GO:0006629//GO:0008150//GO:0044249//GO:0044283//GO:0006694//GO:1901617//GO:0008202//GO:1901615	alcohol biosynthetic process//sterol biosynthetic process//alcohol metabolic process//organic substance biosynthetic process//cellular lipid metabolic process//organic substance metabolic process//organic cyclic compound metabolic process//metabolic process//sterol metabolic process//cellular metabolic process//lipid biosynthetic process//biosynthetic process//small molecule metabolic process//or…	--	--	GO:0003674//GO:0016746//GO:0004421//GO:0016740//GO:0046912//GO:0003824	molecular_function//transferase activity, transferring acyl groups//hydroxymethylglutaryl-CoA synthase activity//transferase activity//transferase activity, transferring acyl groups, acyl groups converted into alkyl on transfer//catalytic activity	K01641 hydroxymethylglutaryl-CoA synthase [EC:2.3.3.10] | (RefSeq) hydroxymethylglutaryl-CoA synthase-like	http://www.genome.jp/dbget-bin/www_bget?sot:102597613	-	Hydroxymethylglutaryl-coenzyme A synthase, active site||Thiolase-like||Hydroxymethylglutaryl-coenzyme A synthase, N-terminal||Hydroxymethylglutaryl-CoA synthase, eukaryotic||Hydroxymethylglutaryl-coenzyme A synthase C-terminal domain
152	PGSC0003DMG400004306	645.021	291.492	1.1459	0.00021334	0.0033662	UP	--	--	--	--	--	--	no KO assigned | (RefSeq) putative leucine-rich repeat-containing protein DDB_G0290503	http://www.genome.jp/dbget-bin/www_bget?sot:102605835	--	--
153	PGSC0003DMG400004401	180.561	43.559	2.0514	1.5626e-05	0.00038442	UP	GO:0008150//GO:0044267//GO:0043412//GO:0019538//GO:0006796//GO:0036211//GO:0006468//GO:0044238//GO:0009987//GO:0006793//GO:0008152//GO:0044237//GO:0044260//GO:0006464//GO:0016310//GO:0071704//GO:0043170	biological_process//cellular protein metabolic process//macromolecule modification//protein metabolic process//phosphate-containing compound metabolic process//protein modification process//protein phosphorylation//primary metabolic process//cellular process//phosphorus metabolic process//metabolic process//cellular metabolic process//cellular macromolecule metabolic process//cellular protein mod…	GO:0031224//GO:0044425//GO:0005575//GO:0016021//GO:0016020	intrinsic component of membrane//membrane part//cellular_component//integral component of membrane//membrane	GO:0016740//GO:0016772//GO:0001882//GO:0004672//GO:0001883//GO:0030554//GO:0003824//GO:1901363//GO:0000166//GO:0016773//GO:0097159//GO:0004674//GO:0032550//GO:0032559//GO:0032549//GO:0005488//GO:0032555//GO:0035639//GO:0005524//GO:0043168//GO:0032553//GO:0016301//GO:0036094//GO:0003674//GO:0017076//GO:1901265//GO:0043167//GO:0097367	transferase activity//transferase activity, transferring phosphorus-containing groups//nucleoside binding//protein kinase activity//purine nucleoside binding//adenyl nucleotide binding//catalytic activity//heterocyclic compound binding//nucleotide binding//phosphotransferase activity, alcohol group as acceptor//organic cyclic compound binding//protein serine/threonine kinase activity//purine ribo…	no KO assigned | (RefSeq) L-type lectin-domain containing receptor kinase IX.1-like	http://www.genome.jp/dbget-bin/www_bget?sot:102596545	-	Serine/threonine-protein kinase, active site||Protein kinase domain||Protein kinase, ATP binding site||Protein kinase-like domain
154	PGSC0003DMG400004564	81.2081	21.5013	1.9172	0.0020965	0.02052	UP	GO:0008152//GO:0008150	metabolic process//biological_process	--	--	GO:0003674//GO:0016757//GO:0016758//GO:0016740//GO:0003824	molecular_function//transferase activity, transferring glycosyl groups//transferase activity, transferring hexosyl groups//transferase activity//catalytic activity	K13495 cis-zeatin O-glucosyltransferase [EC:2.4.1.215] | (RefSeq) zeatin O-glucosyltransferase-like	http://www.genome.jp/dbget-bin/www_bget?sot:102603176	-	UDP-glucuronosyl/UDP-glucosyltransferase
155	PGSC0003DMG400004712	1800.17	827.25	1.1217	0.0001507	0.0025545	UP	--	--	--	--	--	--	no KO assigned | (RefSeq) uncharacterized LOC102600818	http://www.genome.jp/dbget-bin/www_bget?sot:102600818	-	Protein of unknown function DUF604
156	PGSC0003DMG400004757	15.0467	0	Inf	0.0063134	0.046944	UP	GO:0006811//GO:0006812//GO:0051179//GO:0030001//GO:0051234//GO:0006810//GO:0008150	ion transport//cation transport//localization//metal ion transport//establishment of localization//transport//biological_process	--	--	GO:0046872//GO:0043167//GO:0003674//GO:0005488//GO:0043169	metal ion binding//ion binding//molecular_function//binding//cation binding	no KO assigned | (RefSeq) uncharacterized LOC102599842	http://www.genome.jp/dbget-bin/www_bget?sot:102599842	-	Heavy metal-associated domain, HMA
157	PGSC0003DMG400004795	1688.17	837.352	1.0116	0.00077612	0.0095716	UP	GO:0042886//GO:0006857//GO:0071702//GO:0051234//GO:0006810//GO:0008150//GO:0015833//GO:0071705//GO:0051179	amide transport//oligopeptide transport//organic substance transport//establishment of localization//transport//biological_process//peptide transport//nitrogen compound transport//localization	GO:0044425//GO:0005575//GO:0016021//GO:0016020//GO:0031224	membrane part//cellular_component//integral component of membrane//membrane//intrinsic component of membrane	GO:0003674//GO:0005215	molecular_function//transporter activity	K14638 solute carrier family 15 (peptide/histidine transporter), member 3/4 | (RefSeq) protein NRT1/ PTR FAMILY 6.3-like	http://www.genome.jp/dbget-bin/www_bget?sot:102606337	-	Major facilitator superfamily domain||PTR2 family proton/oligopeptide symporter, conserved site||Proton-dependent oligopeptide transporter family
158	PGSC0003DMG400004817	411.187	200.684	1.0349	0.0024082	0.022854	UP	--	--	--	--	--	--	no KO assigned | (RefSeq) uncharacterized LOC102591932	http://www.genome.jp/dbget-bin/www_bget?sot:102591932	--	--
159	PGSC0003DMG400004917	78.9363	14.9013	2.4053	0.00024656	0.0037816	UP	GO:0006928//GO:0008150//GO:0009987//GO:0007018//GO:0007017	movement of cell or subcellular component//biological_process//cellular process//microtubule-based movement//microtubule-based process	GO:0044430//GO:0005623//GO:0043228//GO:0005856//GO:0044464//GO:0043226//GO:0031224//GO:0005622//GO:0005874//GO:0044424//GO:0044425//GO:0043232//GO:0032991//GO:0016020//GO:0015630//GO:0044422//GO:0016021//GO:0043229//GO:0044446//GO:0005575	cytoskeletal part//cell//non-membrane-bounded organelle//cytoskeleton//cell part//organelle//intrinsic component of membrane//intracellular//microtubule//intracellular part//membrane part//intracellular non-membrane-bounded organelle//protein-containing complex//membrane//microtubule cytoskeleton//organelle part//integral component of membrane//intracellular organelle//intracellular organelle par…	GO:0000166//GO:1901363//GO:0003824//GO:0030554//GO:0001883//GO:0001882//GO:0016462//GO:0044877//GO:0097159//GO:0005515//GO:0017111//GO:0008092//GO:0032553//GO:0043168//GO:0005524//GO:0003774//GO:0035639//GO:0005488//GO:0032555//GO:0016817//GO:0032549//GO:0032559//GO:0008017//GO:0016787//GO:0032550//GO:0097367//GO:0003777//GO:0043167//GO:1901265//GO:0015631//GO:0017076//GO:0003674//GO:0016818//GO:…	nucleotide binding//heterocyclic compound binding//catalytic activity//adenyl nucleotide binding//purine nucleoside binding//nucleoside binding//pyrophosphatase activity//protein-containing complex binding//organic cyclic compound binding//protein binding//nucleoside-triphosphatase activity//cytoskeletal protein binding//ribonucleotide binding//anion binding//ATP binding//motor activity//purine r…	K11498 centromeric protein E | (RefSeq) kinesin-related protein 11	http://www.genome.jp/dbget-bin/www_bget?sot:102582775	ZCF125	-||Kinesin motor domain||Kinesin motor domain, conserved site||P-loop containing nucleoside triphosphate hydrolase
160	PGSC0003DMG400004930	8016.92	3946.48	1.0225	0.0001067	0.0019293	UP	GO:0008152//GO:0044237//GO:0006793//GO:0032501//GO:0009875//GO:0016310//GO:0007154//GO:0043170//GO:0071704//GO:0022414//GO:0044706//GO:0044703//GO:0006464//GO:0044260//GO:0051704//GO:0009856//GO:0043412//GO:0044267//GO:0008150//GO:0009987//GO:0006468//GO:0044238//GO:0036211//GO:0008037//GO:0019538//GO:0048544//GO:0006796	metabolic process//cellular metabolic process//phosphorus metabolic process//multicellular organismal process//pollen-pistil interaction//phosphorylation//cell communication//macromolecule metabolic process//organic substance metabolic process//reproductive process//multi-multicellular organism process//multi-organism reproductive process//cellular protein modification process//cellular macromole…	GO:0044425//GO:0016020//GO:0005575//GO:0016021//GO:0031224	membrane part//membrane//cellular_component//integral component of membrane//intrinsic component of membrane	GO:0032553//GO:0043168//GO:0005524//GO:0016301//GO:0032549//GO:0032559//GO:0032550//GO:0035639//GO:0005488//GO:0032555//GO:1901265//GO:0043167//GO:0097367//GO:0003674//GO:0036094//GO:0017076//GO:0003824//GO:0030554//GO:0001883//GO:0000166//GO:1901363//GO:0001882//GO:0016772//GO:0016740//GO:0004672//GO:0097159//GO:0004674//GO:0016773	ribonucleotide binding//anion binding//ATP binding//kinase activity//ribonucleoside binding//adenyl ribonucleotide binding//purine ribonucleoside binding//purine ribonucleoside triphosphate binding//binding//purine ribonucleotide binding//nucleoside phosphate binding//ion binding//carbohydrate derivative binding//molecular_function//small molecule binding//purine nucleotide binding//catalytic act…	no KO assigned | (RefSeq) G-type lectin S-receptor-like serine/threonine-protein kinase At4g27290	http://www.genome.jp/dbget-bin/www_bget?sot:102603764	-	Protein kinase-like domain||Serine-threonine/tyrosine-protein kinase, catalytic domain||S-locus glycoprotein domain||Bulb-type lectin domain||Serine/threonine-protein kinase, active site||PAN/Apple domain||S-receptor-like serine/threonine-protein kinase||S-locus-specific glycoprotein/EP1||Protein kinase domain
161	PGSC0003DMG400004999	4102.25	1838.54	1.1579	0.0027924	0.025533	UP	GO:0071704//GO:0006793//GO:0008152//GO:0044237//GO:0006796//GO:0006082//GO:0044281//GO:0043436//GO:0009987//GO:0008150//GO:0071344	organic substance metabolic process//phosphorus metabolic process//metabolic process//cellular metabolic process//phosphate-containing compound metabolic process//organic acid metabolic process//small molecule metabolic process//oxoacid metabolic process//cellular process//biological_process//diphosphate metabolic process	GO:0005575//GO:0005737//GO:0044424//GO:0005622//GO:0044464//GO:0005623	cellular_component//cytoplasm//intracellular part//intracellular//cell part//cell	GO:0016818//GO:0003674//GO:0043167//GO:0046872//GO:0004427//GO:0016787//GO:0016817//GO:0005488//GO:0000287//GO:0043169//GO:0016462//GO:0003824	hydrolase activity, acting on acid anhydrides, in phosphorus-containing anhydrides//molecular_function//ion binding//metal ion binding//inorganic diphosphatase activity//hydrolase activity//hydrolase activity, acting on acid anhydrides//binding//magnesium ion binding//cation binding//pyrophosphatase activity//catalytic activity	K01507 inorganic pyrophosphatase [EC:3.6.1.1] | (RefSeq) PPA1, PPase, ppa; soluble inorganic pyrophosphatase-like	http://www.genome.jp/dbget-bin/www_bget?sot:102584131	-	Inorganic pyrophosphatase
162	PGSC0003DMG400005062	963.527	316.55	1.6059	0.0041125	0.034273	UP	GO:0006950//GO:0042744//GO:0008152//GO:0044237//GO:0072593//GO:0008150//GO:0006979//GO:0050896//GO:0055114//GO:0009056//GO:0042743//GO:0044248//GO:0009987	response to stress//hydrogen peroxide catabolic process//metabolic process//cellular metabolic process//reactive oxygen species metabolic process//biological_process//response to oxidative stress//response to stimulus//oxidation-reduction process//catabolic process//hydrogen peroxide metabolic process//cellular catabolic process//cellular process	GO:0005575//GO:0005576	cellular_component//extracellular region	GO:0005488//GO:0004601//GO:0046906//GO:0003674//GO:0043167//GO:0046872//GO:0016491//GO:0003824//GO:0016684//GO:1901363//GO:0020037//GO:0016209//GO:0097159//GO:0043169	binding//peroxidase activity//tetrapyrrole binding//molecular_function//ion binding//metal ion binding//oxidoreductase activity//catalytic activity//oxidoreductase activity, acting on peroxide as acceptor//heterocyclic compound binding//heme binding//antioxidant activity//organic cyclic compound binding//cation binding	K00430 peroxidase [EC:1.11.1.7] | (RefSeq) suberization-associated anionic peroxidase 2-like	http://www.genome.jp/dbget-bin/www_bget?sot:102583921	-	Haem peroxidase, plant/fungal/bacterial||Secretory peroxidase||Peroxidases heam-ligand binding site||Peroxidase, active site||Plant peroxidase||Haem peroxidase
163	PGSC0003DMG400005214	683.467	179.615	1.928	0.0037343	0.031886	UP	GO:0006811//GO:0015698//GO:0008150//GO:0006810//GO:0051234//GO:0006820//GO:0051179	ion transport//inorganic anion transport//biological_process//transport//establishment of localization//anion transport//localization	GO:0044425//GO:0016020//GO:0005575//GO:0016021//GO:0031224	membrane part//membrane//cellular_component//integral component of membrane//intrinsic component of membrane	GO:0015297//GO:0005452//GO:0015291//GO:0003674//GO:0015075//GO:0022857//GO:0015301//GO:0008509//GO:0022804//GO:0005215	antiporter activity//inorganic anion exchanger activity//secondary active transmembrane transporter activity//molecular_function//ion transmembrane transporter activity//transmembrane transporter activity//anion:anion antiporter activity//anion transmembrane transporter activity//active transmembrane transporter activity//transporter activity	no KO assigned | (RefSeq) boron transporter 1	http://www.genome.jp/dbget-bin/www_bget?sot:102591235	-	Bicarbonate transporter, eukaryotic||Bicarbonate transporter, C-terminal
164	PGSC0003DMG400005228	15.0236	0	Inf	0.0032097	0.02845	UP	GO:0008152//GO:0071704//GO:0008150//GO:0006629//GO:0044238	metabolic process//organic substance metabolic process//biological_process//lipid metabolic process//primary metabolic process	--	--	GO:0016787//GO:0003674//GO:0042578//GO:0003824//GO:0016788//GO:0008081	hydrolase activity//molecular_function//phosphoric ester hydrolase activity//catalytic activity//hydrolase activity, acting on ester bonds//phosphoric diester hydrolase activity	--	--	-	PLC-like phosphodiesterase, TIM beta/alpha-barrel domain||Glycerophosphodiester phosphodiesterase domain
165	PGSC0003DMG400005245	2102.92	1045.1	1.0088	0.00055345	0.007257	UP	--	--	--	--	--	--	no KO assigned | (RefSeq) metacaspase-1-like	http://www.genome.jp/dbget-bin/www_bget?sot:102595692	-	Caspase-like domain||Zinc finger, LSD1-type||Metacaspase type I, plant
166	PGSC0003DMG400005339	255.469	91.6885	1.4783	0.0012011	0.013399	UP	--	--	--	--	--	--	no KO assigned | (RefSeq) uncharacterized LOC102589112	http://www.genome.jp/dbget-bin/www_bget?sot:102589112	-	WD40-like Beta Propeller
167	PGSC0003DMG400005419	259.862	90.5046	1.5217	0.00022724	0.0035337	UP	--	--	GO:0005575//GO:0016020//GO:0005886//GO:0071944//GO:0044464//GO:0005623	cellular_component//membrane//plasma membrane//cell periphery//cell part//cell	GO:0003674//GO:0016818//GO:0036094//GO:0017076//GO:1901265//GO:0043167//GO:0097367//GO:0016817//GO:0032549//GO:0016787//GO:0032550//GO:0035639//GO:0005488//GO:0032555//GO:0032553//GO:0003924//GO:0043168//GO:0017111//GO:0097159//GO:0016462//GO:0032561//GO:0001882//GO:0019001//GO:0005525//GO:0003824//GO:0001883//GO:0000166//GO:1901363	molecular_function//hydrolase activity, acting on acid anhydrides, in phosphorus-containing anhydrides//small molecule binding//purine nucleotide binding//nucleoside phosphate binding//ion binding//carbohydrate derivative binding//hydrolase activity, acting on acid anhydrides//ribonucleoside binding//hydrolase activity//purine ribonucleoside binding//purine ribonucleoside triphosphate binding//bi…	K07904 Ras-related protein Rab-11A | (RefSeq) ras-related protein RABA5e-like	http://www.genome.jp/dbget-bin/www_bget?sot:102581739	AtRABA5b	Small GTP-binding protein domain||Small GTPase superfamily||P-loop containing nucleoside triphosphate hydrolase
168	PGSC0003DMG400005426	90.0975	18.5955	2.2765	0.00094918	0.011235	UP	--	--	GO:0005576//GO:0048046//GO:0005575	extracellular region//apoplast//cellular_component	GO:0003824//GO:0016853//GO:0003674	catalytic activity//isomerase activity//molecular_function	no KO assigned | (RefSeq) dirigent protein 22-like	http://www.genome.jp/dbget-bin/www_bget?sot:102601795	-	Allene oxide cyclase/dirigent protein||Dirigent protein
169	PGSC0003DMG400005498	297.164	85.008	1.8056	0.0010589	0.012184	UP	GO:0006629//GO:0009062//GO:0008150//GO:0019752//GO:0016042//GO:0072329//GO:0006082//GO:0006635//GO:0030258//GO:0009056//GO:0055114//GO:1901575//GO:0009987//GO:0043436//GO:0044282//GO:0044238//GO:0044248//GO:0044281//GO:0032787//GO:0046395//GO:0034440//GO:0044237//GO:0008152//GO:0044242//GO:0019395//GO:0006631//GO:0071704//GO:0016054//GO:0044255	lipid metabolic process//fatty acid catabolic process//biological_process//carboxylic acid metabolic process//lipid catabolic process//monocarboxylic acid catabolic process//organic acid metabolic process//fatty acid beta-oxidation//lipid modification//catabolic process//oxidation-reduction process//organic substance catabolic process//cellular process//oxoacid metabolic process//small molecule c…	GO:0044444//GO:0005623//GO:0005622//GO:0043226//GO:0044464//GO:0042579//GO:0044424//GO:0005737//GO:0043229//GO:0043231//GO:0005575//GO:0043227//GO:0005777	cytoplasmic part//cell//intracellular//organelle//cell part//microbody//intracellular part//cytoplasm//intracellular organelle//intracellular membrane-bounded organelle//cellular_component//membrane-bounded organelle//peroxisome	GO:0016491//GO:0003857//GO:0003824//GO:0016616//GO:0003674//GO:0016614	oxidoreductase activity//3-hydroxyacyl-CoA dehydrogenase activity//catalytic activity//oxidoreductase activity, acting on the CH-OH group of donors, NAD or NADP as acceptor//molecular_function//oxidoreductase activity, acting on CH-OH group of donors	K10527 enoyl-CoA hydratase/3-hydroxyacyl-CoA dehydrogenase [EC:4.2.1.17 1.1.1.35 1.1.1.211] | (RefSeq) peroxisomal fatty acid beta-oxidation multifunctional protein AIM1-like	http://www.genome.jp/dbget-bin/www_bget?sot:102587367	-	Peroxisomal fatty acid beta-oxidation multifunctional protein AIM1||ClpP/crotonase-like domain||Crotonase superfamily||6-phosphogluconate dehydrogenase C-terminal domain-like||3-hydroxyacyl-CoA dehydrogenase, conserved site||6-phosphogluconate dehydrogenase, domain 2||3-hydroxyacyl-CoA dehydrogenase, C-terminal||NAD(P)-binding domain||3-hydroxyacyl-CoA dehydrogenase, NAD binding
170	PGSC0003DMG400005528	158.566	12.9189	3.6175	0.00017238	0.0028473	UP	--	--	--	--	GO:0005488//GO:0003674//GO:0046983//GO:0005515	binding//molecular_function//protein dimerization activity//protein binding	K13422 transcription factor MYC2 | (RefSeq) transcription factor MYC2-like	http://www.genome.jp/dbget-bin/www_bget?sot:102597494	-	Transcription factor MYC/MYB N-terminal||GAF domain-like||Myc-type, basic helix-loop-helix (bHLH) domain
171	PGSC0003DMG400005538	479.877	230.012	1.061	0.0014302	0.015312	UP	--	--	GO:0031224//GO:0016021//GO:0005575//GO:0016020//GO:0044425	intrinsic component of membrane//integral component of membrane//cellular_component//membrane//membrane part	--	--	no KO assigned | (RefSeq) receptor-like protein 12	http://www.genome.jp/dbget-bin/www_bget?sot:102583983	-	Leucine-rich repeat||Leucine-rich repeat, typical subtype||Leucine-rich repeat domain, L domain-like
172	PGSC0003DMG400005620	56.4459	1.48013	5.2531	5.2711e-07	2.068e-05	UP	--	--	GO:0043226//GO:0044464//GO:0031224//GO:0005622//GO:0005623//GO:0043228//GO:0012511//GO:0016020//GO:0005811//GO:0043229//GO:0016021//GO:0005575//GO:0044424//GO:0044425//GO:0043232	organelle//cell part//intrinsic component of membrane//intracellular//cell//non-membrane-bounded organelle//monolayer-surrounded lipid storage body//membrane//lipid droplet//intracellular organelle//integral component of membrane//cellular_component//intracellular part//membrane part//intracellular non-membrane-bounded organelle	--	--	no KO assigned | (RefSeq) oleosin 1-like	http://www.genome.jp/dbget-bin/www_bget?sot:102580137	-	Oleosin
173	PGSC0003DMG400005654	27.1835	1.62349	4.0656	0.0011414	0.012902	UP	GO:0008150//GO:0042221//GO:0051239//GO:0009791//GO:0065007//GO:0010030//GO:0051240//GO:2000026//GO:0050789//GO:0051094//GO:0033993//GO:0050896//GO:0001101//GO:1900140//GO:0050793//GO:1901700//GO:0032502//GO:0010029//GO:0009737//GO:0007275//GO:0009845//GO:0009719//GO:0097305//GO:0048580//GO:0048518//GO:0032501//GO:0048582//GO:0009725//GO:0010033//GO:0090351	biological_process//response to chemical//regulation of multicellular organismal process//post-embryonic development//biological regulation//positive regulation of seed germination//positive regulation of multicellular organismal process//regulation of multicellular organismal development//regulation of biological process//positive regulation of developmental process//response to lipid//response …	GO:0005623//GO:0005622//GO:0005634//GO:0044464//GO:0043226//GO:0044424//GO:0005575//GO:0043231//GO:0043229//GO:0043227	cell//intracellular//nucleus//cell part//organelle//intracellular part//cellular_component//intracellular membrane-bounded organelle//intracellular organelle//membrane-bounded organelle	--	--	no KO assigned | (RefSeq) protein MOTHER of FT and TF 1	http://www.genome.jp/dbget-bin/www_bget?sot:102580467	E12A11	Phosphatidylethanolamine-binding, conserved site||Phosphatidylethanolamine-binding protein
174	PGSC0003DMG400005822	176.256	68.1894	1.3701	0.002972	0.026746	UP	GO:0065003//GO:0008150//GO:0043933//GO:0044085//GO:0022607//GO:0071840//GO:0009987//GO:0016043//GO:0051260//GO:0070271//GO:0051259	protein-containing complex assembly//biological_process//protein-containing complex subunit organization//cellular component biogenesis//cellular component assembly//cellular component organization or biogenesis//cellular process//cellular component organization//protein homooligomerization//obsolete protein complex biogenesis//protein complex oligomerization	--	--	--	--	no KO assigned | (RefSeq) BTB/POZ domain-containing protein At5g41330-like	http://www.genome.jp/dbget-bin/www_bget?sot:102593262	-	BTB/POZ domain||Potassium channel tetramerisation-type BTB domain||WD40/YVTN repeat-like-containing domain||SKP1/BTB/POZ domain
175	PGSC0003DMG400005823	60.5525	15.5726	1.9592	0.0050806	0.040034	UP	--	--	GO:0016020//GO:0016021//GO:0005575//GO:0044425//GO:0031224	membrane//integral component of membrane//cellular_component//membrane part//intrinsic component of membrane	GO:0046872//GO:0043167//GO:0003674//GO:0005488//GO:0008270//GO:0043169//GO:0046914	metal ion binding//ion binding//molecular_function//binding//zinc ion binding//cation binding//transition metal ion binding	K16281 RING-H2 zinc finger protein RHA1 | (RefSeq) E3 ubiquitin-protein ligase RHA1B-like	http://www.genome.jp/dbget-bin/www_bget?sot:102592926	-	Zinc finger, RING/FYVE/PHD-type||Zinc finger, RING-CH-type||Zinc finger, RING-type
176	PGSC0003DMG400005825	2717.87	987.259	1.461	0.0029472	0.026589	UP	GO:0008152//GO:0044237//GO:0042218//GO:0016053//GO:0018871//GO:0032787//GO:0071704//GO:1901605//GO:0046394//GO:0006520//GO:1901576//GO:0044283//GO:1901607//GO:0019752//GO:0008150//GO:1901564//GO:1901566//GO:0044249//GO:0044281//GO:0043436//GO:0044238//GO:0009987//GO:0006807//GO:0009058//GO:0072330//GO:0006082//GO:0008652	metabolic process//cellular metabolic process//1-aminocyclopropane-1-carboxylate biosynthetic process//organic acid biosynthetic process//1-aminocyclopropane-1-carboxylate metabolic process//monocarboxylic acid metabolic process//organic substance metabolic process//alpha-amino acid metabolic process//carboxylic acid biosynthetic process//cellular amino acid metabolic process//organic substance b…	--	--	GO:0043168//GO:0016829//GO:0016847//GO:0016846//GO:0005488//GO:0043167//GO:0030170//GO:0003674//GO:0048037//GO:0003824//GO:1901363//GO:0097159	anion binding//lyase activity//1-aminocyclopropane-1-carboxylate synthase activity//carbon-sulfur lyase activity//binding//ion binding//pyridoxal phosphate binding//molecular_function//cofactor binding//catalytic activity//heterocyclic compound binding//organic cyclic compound binding	K20772 1-aminocyclopropane-1-carboxylate synthase 1/2/6 [EC:4.4.1.14] | (RefSeq) STACS5, ppACS1; 1-aminocyclopropane-1-carboxylate synthase	http://www.genome.jp/dbget-bin/www_bget?sot:102577619	-	Pyridoxal phosphate-dependent transferase||Aminotransferase, class I/classII||Pyridoxal phosphate-dependent transferase, major region, subdomain 1||Aminotransferases, class-I, pyridoxal-phosphate-binding site||Pyridoxal phosphate-dependent transferase, subdomain 2
177	PGSC0003DMG400005899	554.466	262.497	1.0788	0.0039641	0.033379	UP	--	--	--	--	GO:0005488//GO:0003674//GO:0003676//GO:1901363//GO:0097159	binding//molecular_function//nucleic acid binding//heterocyclic compound binding//organic cyclic compound binding	K12581 CCR4-NOT transcription complex subunit 7/8 | (RefSeq) probable CCR4-associated factor 1 homolog 9	http://www.genome.jp/dbget-bin/www_bget?sot:102578270	-	Ribonuclease CAF1||Ribonuclease H-like domain
178	PGSC0003DMG400005975	90.4473	20.4147	2.1475	0.0012285	0.013633	UP	GO:0036211//GO:0009987//GO:0006468//GO:0044238//GO:0006796//GO:0019538//GO:0044267//GO:0043412//GO:0008150//GO:0043170//GO:0071704//GO:0016310//GO:0006464//GO:0044260//GO:0044237//GO:0008152//GO:0006793	protein modification process//cellular process//protein phosphorylation//primary metabolic process//phosphate-containing compound metabolic process//protein metabolic process//cellular protein metabolic process//macromolecule modification//biological_process//macromolecule metabolic process//organic substance metabolic process//phosphorylation//cellular protein modification process//cellular macr…	--	--	GO:0097159//GO:0016773//GO:1901363//GO:0000166//GO:0001883//GO:0003824//GO:0030554//GO:0004672//GO:0016772//GO:0016740//GO:0001882//GO:0097367//GO:1901265//GO:0043167//GO:0017076//GO:0036094//GO:0003674//GO:0016301//GO:0043168//GO:0005524//GO:0032553//GO:0005488//GO:0032555//GO:0035639//GO:0032550//GO:0032549//GO:0032559	organic cyclic compound binding//phosphotransferase activity, alcohol group as acceptor//heterocyclic compound binding//nucleotide binding//purine nucleoside binding//catalytic activity//adenyl nucleotide binding//protein kinase activity//transferase activity, transferring phosphorus-containing groups//transferase activity//nucleoside binding//carbohydrate derivative binding//nucleoside phosphate…	K04733 interleukin-1 receptor-associated kinase 4 [EC:2.7.11.1] | (RefSeq) probable serine/threonine-protein kinase At1g18390	http://www.genome.jp/dbget-bin/www_bget?sot:102589945	-	Protein kinase-like domain||Serine/threonine-protein kinase, active site||Protein kinase domain
179	PGSC0003DMG400006015	122.573	20.2723	2.5961	0.0049423	0.03919	UP	--	--	--	--	--	--	--	--	--	--
180	PGSC0003DMG400006045	71.3925	0.858756	6.3774	2.9683e-10	2.6659e-08	UP	--	--	GO:0044425//GO:0016020//GO:0005575//GO:0016021//GO:0031224	membrane part//membrane//cellular_component//integral component of membrane//intrinsic component of membrane	--	--	K19040 E3 ubiquitin-protein ligase ATL10/75/76/77/78 [EC:2.3.2.27] | (RefSeq) RING-H2 finger protein ATL78-like	http://www.genome.jp/dbget-bin/www_bget?sot:102599929	-	Zinc finger, RING/FYVE/PHD-type||Zinc finger, RING-type
181	PGSC0003DMG400006198	1257.8	508.685	1.3061	0.0028676	0.025997	UP	GO:0071704//GO:0043170//GO:0008152//GO:0006508//GO:0044238//GO:0019538//GO:0008150	organic substance metabolic process//macromolecule metabolic process//metabolic process//proteolysis//primary metabolic process//protein metabolic process//biological_process	GO:0016020//GO:0005575	membrane//cellular_component	GO:0008236//GO:0003674//GO:0008233//GO:0004252//GO:0004175//GO:0016787//GO:0070011//GO:0003824//GO:0017171	serine-type peptidase activity//molecular_function//peptidase activity//serine-type endopeptidase activity//endopeptidase activity//hydrolase activity//peptidase activity, acting on L-amino acid peptides//catalytic activity//serine hydrolase activity	no KO assigned | (RefSeq) subtilisin-like protease SBT1.6	http://www.genome.jp/dbget-bin/www_bget?sot:102593529	SLP2	Peptidase S8, subtilisin, Ser-active site||Cucumisin-like catalytic domain||Peptidase S8/S53 domain||PA domain||Peptidase S8, subtilisin-related||Peptidase S8 propeptide/proteinase inhibitor I9
182	PGSC0003DMG400006214	211.54	84.762	1.3194	0.0012146	0.013523	UP	GO:0032259//GO:0008152//GO:0008150	methylation//metabolic process//biological_process	--	--	GO:0016741//GO:0008168//GO:0003674//GO:0008171//GO:0016740//GO:0003824	transferase activity, transferring one-carbon groups//methyltransferase activity//molecular_function//O-methyltransferase activity//transferase activity//catalytic activity	K00588 caffeoyl-CoA O-methyltransferase [EC:2.1.1.104] | (RefSeq) caffeoyl-CoA O-methyltransferase 5-like	http://www.genome.jp/dbget-bin/www_bget?sot:102595685	-	S-adenosyl-L-methionine-dependent methyltransferase||O-methyltransferase, family 3
183	PGSC0003DMG400006323	14.8414	0	Inf	0.0067151	0.049219	UP	--	--	--	--	--	--	no KO assigned | (RefSeq) uncharacterized LOC102581474	http://www.genome.jp/dbget-bin/www_bget?sot:102581474	-	Zinc finger, FYVE/PHD-type||Zinc finger, RING/FYVE/PHD-type||DC1
184	PGSC0003DMG400006396	341.064	65.2895	2.3851	0.00019322	0.0031108	UP	GO:1901566//GO:0044249//GO:0034641//GO:0009069//GO:0006760//GO:0006544//GO:0008150//GO:1901564//GO:0019752//GO:1901607//GO:0006732//GO:0044283//GO:0043603//GO:0008652//GO:0006082//GO:0009058//GO:0006807//GO:0046483//GO:0044238//GO:0043436//GO:0009987//GO:0044281//GO:0051186//GO:0046653//GO:0006545//GO:1901360//GO:0006575//GO:0042558//GO:0044237//GO:0035999//GO:0016053//GO:0008152//GO:1901576//GO:…	organonitrogen compound biosynthetic process//cellular biosynthetic process//cellular nitrogen compound metabolic process//serine family amino acid metabolic process//folic acid-containing compound metabolic process//glycine metabolic process//biological_process//organonitrogen compound metabolic process//carboxylic acid metabolic process//alpha-amino acid biosynthetic process//coenzyme metabolic…	--	--	GO:0016740//GO:1901363//GO:0003824//GO:0016742//GO:0097159//GO:0005488//GO:0016741//GO:0043168//GO:0004372//GO:0048037//GO:0003674//GO:0030170//GO:0043167	transferase activity//heterocyclic compound binding//catalytic activity//hydroxymethyl-, formyl- and related transferase activity//organic cyclic compound binding//binding//transferase activity, transferring one-carbon groups//anion binding//glycine hydroxymethyltransferase activity//cofactor binding//molecular_function//pyridoxal phosphate binding//ion binding	K00600 glycine hydroxymethyltransferase [EC:2.1.2.1] | (RefSeq) serine hydroxymethyltransferase, mitochondrial-like	http://www.genome.jp/dbget-bin/www_bget?sot:102599354	SHM2	Pyridoxal phosphate-dependent transferase, subdomain 2||Serine hydroxymethyltransferase, pyridoxal phosphate binding site||Pyridoxal phosphate-dependent transferase||Pyridoxal phosphate-dependent transferase, major region, subdomain 1||Serine hydroxymethyltransferase
185	PGSC0003DMG400006506	7719.62	3822.47	1.014	0.001044	0.012043	UP	GO:0044237//GO:0006563//GO:0016053//GO:0006535//GO:0044272//GO:0008152//GO:0071704//GO:1901605//GO:0019499//GO:1901576//GO:0009070//GO:0046394//GO:0006520//GO:0019752//GO:0044283//GO:1901607//GO:0034641//GO:0000097//GO:1901566//GO:0044249//GO:0008150//GO:1901564//GO:0009069//GO:0000096//GO:0044238//GO:0043436//GO:0009987//GO:0019344//GO:0006790//GO:0044281//GO:0006534//GO:0008652//GO:0006082//GO:…	cellular metabolic process//L-serine metabolic process//organic acid biosynthetic process//cysteine biosynthetic process from serine//sulfur compound biosynthetic process//metabolic process//organic substance metabolic process//alpha-amino acid metabolic process//cyanide metabolic process//organic substance biosynthetic process//serine family amino acid biosynthetic process//carboxylic acid biosy…	GO:0044424//GO:0005737//GO:0005739//GO:0043227//GO:0043229//GO:0005575//GO:0043231//GO:0005623//GO:0044444//GO:0044464//GO:0043226//GO:0005622	intracellular part//cytoplasm//mitochondrion//membrane-bounded organelle//intracellular organelle//cellular_component//intracellular membrane-bounded organelle//cell//cytoplasmic part//cell part//organelle//intracellular	GO:0016829//GO:0016846//GO:0016835//GO:0004124//GO:0003674//GO:0003824//GO:0050017//GO:0016740	lyase activity//carbon-sulfur lyase activity//carbon-oxygen lyase activity//cysteine synthase activity//molecular_function//catalytic activity//L-3-cyanoalanine synthase activity//transferase activity	K13034 L-3-cyanoalanine synthase/ cysteine synthase [EC:2.5.1.47 4.4.1.9] | (RefSeq) PCAS-1; bifunctional L-3-cyanoalanine synthase/cysteine synthase 1, mitochondrial	http://www.genome.jp/dbget-bin/www_bget?sot:102604154	-	Tryptophan synthase beta subunit-like PLP-dependent enzyme||L-3-cyanoalanine synthase, mitochondrial||Cysteine synthase||Cysteine synthase CysK||Cysteine synthase/cystathionine beta-synthase, pyridoxal-phosphate attachment site
186	PGSC0003DMG400006550	939.809	354.404	1.407	0.0025378	0.023788	UP	--	--	GO:0031224//GO:0044425//GO:0016021//GO:0005575//GO:0016020	intrinsic component of membrane//membrane part//integral component of membrane//cellular_component//membrane	--	--	K13946 auxin influx carrier (AUX1 LAX family) | (RefSeq) auxin transporter-like protein 3	http://www.genome.jp/dbget-bin/www_bget?sot:102584729	LAX3	Amino acid transporter, transmembrane domain
187	PGSC0003DMG400006639	150.028	42.2265	1.829	0.0002726	0.0040969	UP	GO:0071704//GO:0043170//GO:0016310//GO:0044260//GO:0006464//GO:0044237//GO:0008152//GO:0006793//GO:0006468//GO:0044238//GO:0009987//GO:0036211//GO:0006796//GO:0019538//GO:0044267//GO:0043412//GO:0008150	organic substance metabolic process//macromolecule metabolic process//phosphorylation//cellular macromolecule metabolic process//cellular protein modification process//cellular metabolic process//metabolic process//phosphorus metabolic process//protein phosphorylation//primary metabolic process//cellular process//protein modification process//phosphate-containing compound metabolic process//prote…	--	--	GO:0097367//GO:1901265//GO:0043167//GO:0017076//GO:0003674//GO:0036094//GO:0016301//GO:0032553//GO:0005524//GO:0043168//GO:0035639//GO:0005488//GO:0032555//GO:0032559//GO:0032549//GO:0032550//GO:0004674//GO:0097159//GO:0016773//GO:0000166//GO:1901363//GO:0030554//GO:0003824//GO:0001883//GO:0004672//GO:0001882//GO:0016740//GO:0016772	carbohydrate derivative binding//nucleoside phosphate binding//ion binding//purine nucleotide binding//molecular_function//small molecule binding//kinase activity//ribonucleotide binding//ATP binding//anion binding//purine ribonucleoside triphosphate binding//binding//purine ribonucleotide binding//adenyl ribonucleotide binding//ribonucleoside binding//purine ribonucleoside binding//protein serin…	K20714 serine/threonine-protein kinase OXI1 [EC:2.7.11.1] | (RefSeq) serine/threonine-protein kinase OXI1-like	http://www.genome.jp/dbget-bin/www_bget?sot:102580814	-	Protein kinase-like domain||Protein kinase domain||AGC-kinase, C-terminal||Serine/threonine-protein kinase, active site
188	PGSC0003DMG400006662	3669.77	1496.3	1.2943	0.0051393	0.040305	UP	GO:0008150//GO:0050896//GO:0006950	biological_process//response to stimulus//response to stress	--	--	--	--	no KO assigned | (RefSeq) ci21B; abscisic stress-ripening protein 2	http://www.genome.jp/dbget-bin/www_bget?sot:102583792	-	ABA/WDS induced protein
189	PGSC0003DMG400006856	598.518	58.0694	3.3655	9.4574e-07	3.4181e-05	UP	--	--	GO:0005618//GO:0005623//GO:0044464//GO:0071944//GO:0005575//GO:0005886//GO:0016020//GO:0030312	cell wall//cell//cell part//cell periphery//cellular_component//plasma membrane//membrane//external encapsulating structure	--	--	no KO assigned | (RefSeq) uncharacterized LOC102582371	http://www.genome.jp/dbget-bin/www_bget?sot:102582371	-	Galactose-binding domain-like||Domain of unknown function DUF642
190	PGSC0003DMG400006896	1757.41	778.941	1.1739	2.5449e-05	0.00059005	UP	GO:0006820//GO:0009987//GO:0051179//GO:0032879//GO:0051049//GO:0050794//GO:0065007//GO:0008150//GO:0051234//GO:0043269//GO:0006810//GO:0050789//GO:0034765//GO:0034762//GO:0098656//GO:0034220//GO:0006811//GO:1903959//GO:0044070//GO:0055085	anion transport//cellular process//localization//regulation of localization//regulation of transport//regulation of cellular process//biological regulation//biological_process//establishment of localization//regulation of ion transport//transport//regulation of biological process//regulation of ion transmembrane transport//regulation of transmembrane transport//anion transmembrane transport//ion …	GO:0005740//GO:0031975//GO:0031224//GO:0043226//GO:0046930//GO:0044464//GO:0005622//GO:0005623//GO:0044444//GO:0005741//GO:0019867//GO:0098796//GO:0031967//GO:0043227//GO:0031090//GO:0016020//GO:0044429//GO:0032991//GO:0005739//GO:0031968//GO:0098588//GO:0098805//GO:0043231//GO:0005575//GO:0044446//GO:0043229//GO:0016021//GO:0044422//GO:0044425//GO:0005737//GO:0044424//GO:0031966	mitochondrial envelope//envelope//intrinsic component of membrane//organelle//pore complex//cell part//intracellular//cell//cytoplasmic part//mitochondrial outer membrane//outer membrane//membrane protein complex//organelle envelope//membrane-bounded organelle//organelle membrane//membrane//mitochondrial part//protein-containing complex//mitochondrion//organelle outer membrane//bounding membrane …	GO:0008308//GO:0022803//GO:0008509//GO:0015288//GO:0005215//GO:0022838//GO:0005253//GO:0015075//GO:0022829//GO:0005244//GO:0022857//GO:0005216//GO:0003674//GO:0022836//GO:0022832//GO:0015267	voltage-gated anion channel activity//passive transmembrane transporter activity//anion transmembrane transporter activity//porin activity//transporter activity//substrate-specific channel activity//anion channel activity//ion transmembrane transporter activity//wide pore channel activity//voltage-gated ion channel activity//transmembrane transporter activity//ion channel activity//molecular_func…	K15040 voltage-dependent anion channel protein 2 | (RefSeq) VDAC; mitochondrial outer membrane protein porin of 34 kDa-like	http://www.genome.jp/dbget-bin/www_bget?sot:102580103	-	Eukaryotic porin/Tom40||Porin, eukaryotic type
191	PGSC0003DMG400006967	15.1806	0	Inf	0.0026886	0.02485	UP	--	--	--	--	--	--	no KO assigned | (RefSeq) uncharacterized LOC102579666	http://www.genome.jp/dbget-bin/www_bget?sot:102579666	-	TPX2, C-terminal
192	PGSC0003DMG400007086	26.9599	1.14773	4.554	0.0068053	0.049687	UP	--	--	--	--	GO:0043169//GO:0003674//GO:0043167//GO:0046872//GO:0005488	cation binding//molecular_function//ion binding//metal ion binding//binding	K11380 NuA3 HAT complex component NTO1 | (RefSeq) protein Jade-1	http://www.genome.jp/dbget-bin/www_bget?sot:102590417	-	Zinc finger, RING/FYVE/PHD-type||Extended PHD (ePHD) domain||Zinc finger, PHD-type||Zinc finger, PHD-finger||Zinc finger, FYVE/PHD-type
193	PGSC0003DMG400007129	227.142	92.4211	1.2973	0.0050707	0.039977	UP	GO:0044419//GO:0050896//GO:0006952//GO:0016441//GO:0051817//GO:0045087//GO:0060255//GO:0050789//GO:0052018//GO:0065007//GO:0010468//GO:0040029//GO:0008150//GO:0035821//GO:0098542//GO:0002376//GO:0009987//GO:0048519//GO:0009607//GO:0010467//GO:0009814//GO:0009616//GO:0006955//GO:0031047//GO:0044403//GO:0008152//GO:0006950//GO:0043207//GO:0010629//GO:0098586//GO:0009892//GO:0060145//GO:0009605//GO:…	interspecies interaction between organisms//response to stimulus//defense response//posttranscriptional gene silencing//modification of morphology or physiology of other organism involved in symbiotic interaction//innate immune response//regulation of macromolecule metabolic process//regulation of biological process//modulation by symbiont of RNA levels in host//biological regulation//regulation …	GO:0044444//GO:0005623//GO:0044464//GO:0005829//GO:0005622//GO:0044424//GO:0005737//GO:0005575	cytoplasmic part//cell//cell part//cytosol//intracellular//intracellular part//cytoplasm//cellular_component	GO:1901363//GO:0003676//GO:0097159//GO:0005488//GO:0003674	heterocyclic compound binding//nucleic acid binding//organic cyclic compound binding//binding//molecular_function	K11593 eukaryotic translation initiation factor 2C | (RefSeq) protein argonaute 5-like	http://www.genome.jp/dbget-bin/www_bget?sot:102594657	AGO5	Ribonuclease H-like domain||PAZ domain||Argonaute, linker 1 domain||Protein argonaute, Mid domain||Argonaute linker 2 domain||Protein argonaute, N-terminal||Piwi domain
194	PGSC0003DMG400007148	93.1168	14.8461	2.649	0.00013407	0.0023201	UP	--	--	--	--	--	--	no KO assigned | (RefSeq) uncharacterized LOC102579967	http://www.genome.jp/dbget-bin/www_bget?sot:102579967	-	Protein of unknown function DUF868, plant
195	PGSC0003DMG400007179	165.777	12.7704	3.6984	6.5242e-05	0.0012857	UP	GO:0008152//GO:0008150//GO:0055114	metabolic process//biological_process//oxidation-reduction process	--	--	GO:0004497//GO:0005488//GO:0005506//GO:0046906//GO:0003674//GO:0043167//GO:0046872//GO:0016705//GO:0016491//GO:0003824//GO:0020037//GO:1901363//GO:0046914//GO:0097159//GO:0043169	monooxygenase activity//binding//iron ion binding//tetrapyrrole binding//molecular_function//ion binding//metal ion binding//oxidoreductase activity, acting on paired donors, with incorporation or reduction of molecular oxygen//oxidoreductase activity//catalytic activity//heme binding//heterocyclic compound binding//transition metal ion binding//organic cyclic compound binding//cation binding	K09754 coumaroylquinate(coumaroylshikimate) 3'-monooxygenase [EC:1.14.13.36] | (RefSeq) cytochrome P450 98A2-like	http://www.genome.jp/dbget-bin/www_bget?sot:102606401	-	Cytochrome P450, E-class, group I||Cytochrome P450||Cytochrome P450, conserved site
196	PGSC0003DMG400007181	807.66	61.6136	3.7124	1.4338e-05	0.00035717	UP	GO:0008152//GO:0055114//GO:0008150	metabolic process//oxidation-reduction process//biological_process	--	--	GO:0043167//GO:0046872//GO:0003674//GO:0046906//GO:0005488//GO:0005506//GO:0097159//GO:0043169//GO:0046914//GO:0003824//GO:0020037//GO:1901363//GO:0016705//GO:0016491	ion binding//metal ion binding//molecular_function//tetrapyrrole binding//binding//iron ion binding//organic cyclic compound binding//cation binding//transition metal ion binding//catalytic activity//heme binding//heterocyclic compound binding//oxidoreductase activity, acting on paired donors, with incorporation or reduction of molecular oxygen//oxidoreductase activity	K09754 coumaroylquinate(coumaroylshikimate) 3'-monooxygenase [EC:1.14.13.36] | (RefSeq) cytochrome P450 98A3-like	http://www.genome.jp/dbget-bin/www_bget?sot:102585799	-	Cytochrome P450||Cytochrome P450, E-class, group I
197	PGSC0003DMG400007335	84.4534	9.52241	3.1488	0.00097154	0.011427	UP	--	--	GO:0044425//GO:0016020//GO:0016021//GO:0005575//GO:0031224	membrane part//membrane//integral component of membrane//cellular_component//intrinsic component of membrane	GO:0032553//GO:0043168//GO:0005524//GO:0035639//GO:0032555//GO:0005488//GO:0032549//GO:0032559//GO:0032550//GO:0016787//GO:0097367//GO:1901265//GO:0043167//GO:0017076//GO:0003674//GO:0036094//GO:0000166//GO:1901363//GO:0003824//GO:0030554//GO:0001883//GO:0001882//GO:0097159	ribonucleotide binding//anion binding//ATP binding//purine ribonucleoside triphosphate binding//purine ribonucleotide binding//binding//ribonucleoside binding//adenyl ribonucleotide binding//purine ribonucleoside binding//hydrolase activity//carbohydrate derivative binding//nucleoside phosphate binding//ion binding//purine nucleotide binding//molecular_function//small molecule binding//nucleotide…	K14641 apyrase [EC:3.6.1.5] | (RefSeq) apyrase-like	http://www.genome.jp/dbget-bin/www_bget?sot:102590620	-	Nucleoside phosphatase GDA1/CD39
198	PGSC0003DMG400007384	1742.04	804.05	1.1154	9.4608e-05	0.0017478	UP	--	--	--	--	--	--	no KO assigned | (RefSeq) EG45-like domain containing protein	http://www.genome.jp/dbget-bin/www_bget?sot:102600097	-	RlpA-like protein, double-psi beta-barrel domain||Expansin/pollen allergen, DPBB domain
199	PGSC0003DMG400007468	406.119	197.081	1.0431	0.0017651	0.018078	UP	--	--	--	--	--	--	no KO assigned | (RefSeq) programmed cell death 6-interacting protein	http://www.genome.jp/dbget-bin/www_bget?sot:102589109	-	BRO1 domain
200	PGSC0003DMG400007581	256.298	94.5474	1.4387	0.00030738	0.0044906	UP	--	--	--	--	--	--	no KO assigned | (RefSeq) eukaryotic translation initiation factor 5B	http://www.genome.jp/dbget-bin/www_bget?sot:102599659	--	--
201	PGSC0003DMG400007614	9686.8	3750.54	1.3689	0.00048441	0.006515	UP	GO:0008152//GO:0055114//GO:0008150	metabolic process//oxidation-reduction process//biological_process	GO:0016021//GO:0005575//GO:0016020//GO:0044425//GO:0031224//GO:0070469	integral component of membrane//cellular_component//membrane//membrane part//intrinsic component of membrane//respiratory chain	GO:0003674//GO:0046872//GO:0043167//GO:0005488//GO:0016682//GO:0016679//GO:0009916//GO:0043169//GO:0016491//GO:0003824	molecular_function//metal ion binding//ion binding//binding//oxidoreductase activity, acting on diphenols and related substances as donors, oxygen as acceptor//oxidoreductase activity, acting on diphenols and related substances as donors//alternative oxidase activity//cation binding//oxidoreductase activity//catalytic activity	K17893 ubiquinol oxidase [EC:1.10.3.11] | (RefSeq) AOX; ubiquinol oxidase 1, mitochondrial-like	http://www.genome.jp/dbget-bin/www_bget?sot:102588786	-	Alternative oxidase
202	PGSC0003DMG400007634	4599.05	1898.56	1.2764	3.0448e-06	9.3021e-05	UP	GO:0044260//GO:0006464//GO:0016310//GO:0071704//GO:0043170//GO:0006793//GO:0008152//GO:0044237//GO:0019538//GO:0006796//GO:0036211//GO:0044238//GO:0006468//GO:0009987//GO:0008150//GO:0044267//GO:0043412	cellular macromolecule metabolic process//cellular protein modification process//phosphorylation//organic substance metabolic process//macromolecule metabolic process//phosphorus metabolic process//metabolic process//cellular metabolic process//protein metabolic process//phosphate-containing compound metabolic process//protein modification process//primary metabolic process//protein phosphorylati…	GO:0005575//GO:0016021//GO:0016020//GO:0044425//GO:0031224	cellular_component//integral component of membrane//membrane//membrane part//intrinsic component of membrane	GO:0036094//GO:0003674//GO:0017076//GO:0043167//GO:1901265//GO:0097367//GO:0032550//GO:0032559//GO:0032549//GO:0032555//GO:0005488//GO:0035639//GO:0005524//GO:0043168//GO:0032553//GO:0016301//GO:0016773//GO:0097159//GO:0004674//GO:0016740//GO:0016772//GO:0001882//GO:0004672//GO:0001883//GO:0030554//GO:0003824//GO:1901363//GO:0000166	small molecule binding//molecular_function//purine nucleotide binding//ion binding//nucleoside phosphate binding//carbohydrate derivative binding//purine ribonucleoside binding//adenyl ribonucleotide binding//ribonucleoside binding//purine ribonucleotide binding//binding//purine ribonucleoside triphosphate binding//ATP binding//anion binding//ribonucleotide binding//kinase activity//phosphotransf…	no KO assigned | (RefSeq) receptor-like protein kinase HSL1	http://www.genome.jp/dbget-bin/www_bget?sot:102601029	-	Protein kinase-like domain||Protein kinase, ATP binding site||Leucine-rich repeat-containing N-terminal, plant-type||Leucine-rich repeat||Protein kinase domain||Serine/threonine-protein kinase, active site||Leucine-rich repeat domain, L domain-like
203	PGSC0003DMG400007788	183.621	84.6741	1.1167	0.0064409	0.047678	UP	GO:0019438//GO:0034654//GO:0060255//GO:0010556//GO:0018130//GO:0050794//GO:0006355//GO:0008150//GO:0031326//GO:0065007//GO:0032774//GO:2000112//GO:0010468//GO:0034641//GO:0009889//GO:0016070//GO:0044249//GO:0031323//GO:0050789//GO:0080090//GO:0090304//GO:1901362//GO:0009987//GO:0051171//GO:0044238//GO:0046483//GO:0006807//GO:0009058//GO:0010467//GO:0051252//GO:0008152//GO:0044237//GO:1901360//GO:…	aromatic compound biosynthetic process//nucleobase-containing compound biosynthetic process//regulation of macromolecule metabolic process//regulation of macromolecule biosynthetic process//heterocycle biosynthetic process//regulation of cellular process//regulation of transcription, DNA-templated//biological_process//regulation of cellular biosynthetic process//biological regulation//RNA biosynt…	--	--	GO:0003676//GO:0003677//GO:1901363//GO:0043565//GO:0097159//GO:0005488//GO:0003700//GO:0003674	nucleic acid binding//DNA binding//heterocyclic compound binding//sequence-specific DNA binding//organic cyclic compound binding//binding//DNA-binding transcription factor activity//molecular_function	no KO assigned | (RefSeq) probable WRKY transcription factor 71	http://www.genome.jp/dbget-bin/www_bget?sot:102590426	-	WRKY domain
204	PGSC0003DMG400007816	171.903	35.5885	2.2721	0.00030329	0.0044395	UP	GO:0005975//GO:0071704//GO:0008152//GO:0044238//GO:0008150	carbohydrate metabolic process//organic substance metabolic process//metabolic process//primary metabolic process//biological_process	GO:0016021//GO:0005575//GO:0016020//GO:0044425//GO:0031224	integral component of membrane//cellular_component//membrane//membrane part//intrinsic component of membrane	GO:0016854//GO:0003674//GO:0016853//GO:0016857//GO:0003824	racemase and epimerase activity//molecular_function//isomerase activity//racemase and epimerase activity, acting on carbohydrates and derivatives//catalytic activity	K08679 UDP-glucuronate 4-epimerase [EC:5.1.3.6] | (RefSeq) UDP-glucuronate 4-epimerase 1-like	http://www.genome.jp/dbget-bin/www_bget?sot:102582872	-	Nucleotide sugar epimerase||NAD(P)-binding domain
205	PGSC0003DMG400007851	73.3186	17.1383	2.097	0.0010981	0.012492	UP	--	--	GO:0031224//GO:0005575//GO:0016021//GO:0016020//GO:0044425	intrinsic component of membrane//cellular_component//integral component of membrane//membrane//membrane part	--	--	--	--	--	--
206	PGSC0003DMG400007960	680.786	127.622	2.4153	2.672e-10	2.4364e-08	UP	--	--	GO:0005575//GO:0016021//GO:0016020//GO:0044425//GO:0031224	cellular_component//integral component of membrane//membrane//membrane part//intrinsic component of membrane	--	--	no KO assigned | (RefSeq) uncharacterized LOC102592145	http://www.genome.jp/dbget-bin/www_bget?sot:102592145	-	Immunoglobulin-like fold||Late embryogenesis abundant protein, LEA-14
207	PGSC0003DMG400008000	337.648	18.5724	4.1843	4.5728e-14	8.7967e-12	UP	--	--	--	--	GO:0003824//GO:0016810//GO:0004067//GO:0016787//GO:0003674//GO:0016811	catalytic activity//hydrolase activity, acting on carbon-nitrogen (but not peptide) bonds//asparaginase activity//hydrolase activity//molecular_function//hydrolase activity, acting on carbon-nitrogen (but not peptide) bonds, in linear amides	K13051 beta-aspartyl-peptidase (threonine type) [EC:3.4.19.5] | (RefSeq) probable isoaspartyl peptidase/L-asparaginase 2	http://www.genome.jp/dbget-bin/www_bget?sot:102584425	-	Peptidase T2, asparaginase 2||Nucleophile aminohydrolases, N-terminal
208	PGSC0003DMG400008117	46697.9	18382.6	1.345	0.00014352	0.0024566	UP	GO:0044267//GO:0006414//GO:1901564//GO:0008150//GO:1901566//GO:0044249//GO:0034641//GO:0006412//GO:0044238//GO:0009987//GO:0009058//GO:0019538//GO:0006807//GO:0043603//GO:0010467//GO:0008152//GO:0044237//GO:0043043//GO:0044271//GO:0071704//GO:0006518//GO:0034645//GO:0043170//GO:0043604//GO:0009059//GO:0044260//GO:1901576	cellular protein metabolic process//translational elongation//organonitrogen compound metabolic process//biological_process//organonitrogen compound biosynthetic process//cellular biosynthetic process//cellular nitrogen compound metabolic process//translation//primary metabolic process//cellular process//biosynthetic process//protein metabolic process//nitrogen compound metabolic process//cellula…	GO:0005623//GO:0044464//GO:0005622//GO:0005737//GO:0044424//GO:0005575	cell//cell part//intracellular//cytoplasm//intracellular part//cellular_component	GO:0001883//GO:0003746//GO:0003824//GO:0005525//GO:1901363//GO:0000166//GO:0003676//GO:0019001//GO:0008135//GO:0001882//GO:0097159//GO:0032561//GO:0016462//GO:0017111//GO:0003723//GO:0043168//GO:0003924//GO:0032553//GO:0032550//GO:0016787//GO:0032549//GO:0016817//GO:0032555//GO:0005488//GO:0035639//GO:0043167//GO:1901265//GO:0097367//GO:0036094//GO:0016818//GO:0003674//GO:0017076	purine nucleoside binding//translation elongation factor activity//catalytic activity//GTP binding//heterocyclic compound binding//nucleotide binding//nucleic acid binding//guanyl nucleotide binding//translation factor activity, RNA binding//nucleoside binding//organic cyclic compound binding//guanyl ribonucleotide binding//pyrophosphatase activity//nucleoside-triphosphatase activity//RNA binding…	K03231 elongation factor 1-alpha | (RefSeq) elongation factor 1-alpha	http://www.genome.jp/dbget-bin/www_bget?sot:102600998	-	Transcription factor, GTP-binding domain||P-loop containing nucleoside triphosphate hydrolase||Translation elongation factor EFTu-like, domain 2||Translation elongation factor EFTu/EF1A, C-terminal||Tr-type G domain, conserved site||Translation elongation factor EF1A/initiation factor IF2gamma, C-terminal||Translation protein, beta-barrel domain||Translation elongation factor EF1A, eukaryotic/arc…
209	PGSC0003DMG400008308	553.459	94.5184	2.5498	0.0042793	0.035247	UP	GO:0044238//GO:0046483//GO:0009987//GO:0090304//GO:0006260//GO:0009058//GO:0006807//GO:0006261//GO:0044249//GO:0034641//GO:0008150//GO:0006259//GO:0071704//GO:0034645//GO:0043170//GO:0006725//GO:0044260//GO:1901576//GO:0009059//GO:0044237//GO:0006270//GO:0008152//GO:1901360//GO:0006139	primary metabolic process//heterocycle metabolic process//cellular process//nucleic acid metabolic process//DNA replication//biosynthetic process//nitrogen compound metabolic process//DNA-dependent DNA replication//cellular biosynthetic process//cellular nitrogen compound metabolic process//biological_process//DNA metabolic process//organic substance metabolic process//cellular macromolecule bios…	GO:0043226//GO:0044464//GO:0005634//GO:0005622//GO:0000347//GO:0005623//GO:0032991//GO:0043227//GO:0044428//GO:0042555//GO:0044446//GO:0043229//GO:0044422//GO:0043231//GO:0005575//GO:0044424	organelle//cell part//nucleus//intracellular//THO complex//cell//protein-containing complex//membrane-bounded organelle//nuclear part//MCM complex//intracellular organelle part//intracellular organelle//organelle part//intracellular membrane-bounded organelle//cellular_component//intracellular part	GO:0004386//GO:0016462//GO:0097159//GO:0017111//GO:1901363//GO:0003677//GO:0003676//GO:0000166//GO:0001883//GO:0030554//GO:0003824//GO:0001882//GO:0097367//GO:1901265//GO:0043167//GO:0017076//GO:0036094//GO:0016818//GO:0003674//GO:0005524//GO:0043168//GO:0032553//GO:0032555//GO:0005488//GO:0035639//GO:0032550//GO:0016787//GO:0032559//GO:0032549//GO:0016817	helicase activity//pyrophosphatase activity//organic cyclic compound binding//nucleoside-triphosphatase activity//heterocyclic compound binding//DNA binding//nucleic acid binding//nucleotide binding//purine nucleoside binding//adenyl nucleotide binding//catalytic activity//nucleoside binding//carbohydrate derivative binding//nucleoside phosphate binding//ion binding//purine nucleotide binding//sm…	K02541 DNA replication licensing factor MCM3 [EC:3.6.4.12] | (RefSeq) DNA replication licensing factor MCM3 homolog 2	http://www.genome.jp/dbget-bin/www_bget?sot:102588993	MCM3	DNA replication licensing factor Mcm3||MCM N-terminal domain||Nucleic acid-binding, OB-fold||MCM OB domain||P-loop containing nucleoside triphosphate hydrolase||Mini-chromosome maintenance, conserved site||-||Mini-chromosome maintenance protein||MCM domain||AAA+ ATPase domain
210	PGSC0003DMG400008360	183.703	23.8709	2.944	0.004265	0.035178	UP	GO:0015801//GO:0034220//GO:0003333//GO:0015849//GO:0006811//GO:0015711//GO:0071702//GO:0046942//GO:0055085//GO:0006865//GO:0009987//GO:0006820//GO:1903825//GO:0051179//GO:0071705//GO:0051234//GO:0006810//GO:0008150//GO:0098656	aromatic amino acid transport//ion transmembrane transport//amino acid transmembrane transport//organic acid transport//ion transport//organic anion transport//organic substance transport//carboxylic acid transport//transmembrane transport//amino acid transport//cellular process//anion transport//organic acid transmembrane transport//localization//nitrogen compound transport//establishment of loc…	GO:0005886//GO:0016020//GO:0005575//GO:0016021//GO:0071944//GO:0044425//GO:0031226//GO:0005887//GO:0031224//GO:0044464//GO:0044459//GO:0005623	plasma membrane//membrane//cellular_component//integral component of membrane//cell periphery//membrane part//intrinsic component of plasma membrane//integral component of plasma membrane//intrinsic component of membrane//cell part//plasma membrane part//cell	GO:0015171//GO:0005342//GO:0003674//GO:0015173//GO:0008514//GO:0008509//GO:0005215//GO:0015075//GO:0046943//GO:0022857	amino acid transmembrane transporter activity//organic acid transmembrane transporter activity//molecular_function//aromatic amino acid transmembrane transporter activity//organic anion transmembrane transporter activity//anion transmembrane transporter activity//transporter activity//ion transmembrane transporter activity//carboxylic acid transmembrane transporter activity//transmembrane transpo…	no KO assigned | (RefSeq) tyrosine-specific transport protein	http://www.genome.jp/dbget-bin/www_bget?sot:102588196	-	Amino acid/polyamine transporter 2||Tryptophan/tyrosine transporter
211	PGSC0003DMG400008538	1149.1	561.994	1.0319	0.0004066	0.0056468	UP	GO:0044237//GO:0051252//GO:0008152//GO:1903506//GO:0006139//GO:1901360//GO:0044271//GO:0071704//GO:0097659//GO:0043170//GO:0034645//GO:0006351//GO:0019222//GO:0006725//GO:1901576//GO:0044260//GO:2001141//GO:0019219//GO:0009059//GO:0050794//GO:0018130//GO:0010556//GO:0060255//GO:0034654//GO:0019438//GO:0016070//GO:0009889//GO:0034641//GO:0050789//GO:0044249//GO:0031323//GO:0031326//GO:0008150//GO:…	cellular metabolic process//regulation of RNA metabolic process//metabolic process//regulation of nucleic acid-templated transcription//nucleobase-containing compound metabolic process//organic cyclic compound metabolic process//cellular nitrogen compound biosynthetic process//organic substance metabolic process//nucleic acid-templated transcription//macromolecule metabolic process//cellular macr…	GO:0044424//GO:0043227//GO:0043229//GO:0005575//GO:0043231//GO:0005623//GO:0044464//GO:0043226//GO:0005622//GO:0005634	intracellular part//membrane-bounded organelle//intracellular organelle//cellular_component//intracellular membrane-bounded organelle//cell//cell part//organelle//intracellular//nucleus	GO:0005488//GO:0003700//GO:0003674//GO:0003677//GO:0003676//GO:1901363//GO:0097159	binding//DNA-binding transcription factor activity//molecular_function//DNA binding//nucleic acid binding//heterocyclic compound binding//organic cyclic compound binding	K09286 EREBP-like factor | (RefSeq) ethylene-responsive transcription factor RAP2-13	http://www.genome.jp/dbget-bin/www_bget?sot:102585333	-	AP2/ERF domain||DNA-binding domain
212	PGSC0003DMG400008542	183.727	52.7086	1.8015	0.0028204	0.025693	UP	--	--	--	--	--	--	--	--	-	VQ
213	PGSC0003DMG400008553	2235.42	1087.9	1.039	0.00016191	0.0027046	UP	GO:0016043//GO:0044238//GO:0007010//GO:0006996//GO:0071840//GO:0043933//GO:0071704//GO:0005975//GO:0008152//GO:0030036//GO:0009987//GO:0007015//GO:0008150//GO:0030029	cellular component organization//primary metabolic process//cytoskeleton organization//organelle organization//cellular component organization or biogenesis//protein-containing complex subunit organization//organic substance metabolic process//carbohydrate metabolic process//metabolic process//actin cytoskeleton organization//cellular process//actin filament organization//biological_process//acti…	GO:0016021//GO:0044425//GO:0031224//GO:0016020//GO:0005575	integral component of membrane//membrane part//intrinsic component of membrane//membrane//cellular_component	GO:0003779//GO:0016798//GO:0005488//GO:0044877//GO:0005515//GO:0051015//GO:0003674//GO:0008092//GO:0004553//GO:0016787//GO:0003824	actin binding//hydrolase activity, acting on glycosyl bonds//binding//protein-containing complex binding//protein binding//actin filament binding//molecular_function//cytoskeletal protein binding//hydrolase activity, hydrolyzing O-glycosyl compounds//hydrolase activity//catalytic activity	no KO assigned | (RefSeq) glucan 1,3-beta-glucosidase-like	http://www.genome.jp/dbget-bin/www_bget?sot:102585668	-	Glycoside hydrolase superfamily||Actin cross-linking||Glycoside hydrolase, family 5||Fascin
214	PGSC0003DMG400008557	4095.1	1684.15	1.2819	0.003449	0.029991	UP	GO:0008150//GO:0008152	biological_process//metabolic process	--	--	GO:0003824//GO:0016740//GO:0003674//GO:0016757//GO:0016758	catalytic activity//transferase activity//molecular_function//transferase activity, transferring glycosyl groups//transferase activity, transferring hexosyl groups	K21374 7-deoxyloganetin glucosyltransferase [EC:2.4.1.324] | (RefSeq) 7-deoxyloganetin glucosyltransferase-like	http://www.genome.jp/dbget-bin/www_bget?sot:102582137	-	UDP-glucuronosyl/UDP-glucosyltransferase||UDP-glycosyltransferase family, conserved site
215	PGSC0003DMG400008629	62.1874	5.06831	3.617	0.0034916	0.030326	UP	--	--	--	--	--	--	no KO assigned | (RefSeq) golgin subfamily A member 1-like	http://www.genome.jp/dbget-bin/www_bget?sot:102594551	--	--
216	PGSC0003DMG400008711	46.7853	5.01772	3.221	0.00028876	0.0042793	UP	--	--	GO:0031224//GO:0016021//GO:0044425//GO:0005575//GO:0016020	intrinsic component of membrane//integral component of membrane//membrane part//cellular_component//membrane	--	--	no KO assigned | (RefSeq) LEA2-1; protein NDR1-like	http://www.genome.jp/dbget-bin/www_bget?sot:102589097	-	Late embryogenesis abundant protein, LEA-14||Immunoglobulin-like fold
217	PGSC0003DMG400008723	3912.88	1826.55	1.0991	0.00010461	0.0019045	UP	GO:0008152//GO:0071704//GO:0044260//GO:0000413//GO:0043412//GO:0008150//GO:0009987//GO:0018193//GO:0018208//GO:0044237//GO:0043170//GO:0006464//GO:0044267//GO:0036211//GO:0044238//GO:0019538	metabolic process//organic substance metabolic process//cellular macromolecule metabolic process//protein peptidyl-prolyl isomerization//macromolecule modification//biological_process//cellular process//peptidyl-amino acid modification//peptidyl-proline modification//cellular metabolic process//macromolecule metabolic process//cellular protein modification process//cellular protein metabolic proc…	--	--	GO:0016853//GO:0003755//GO:0003674//GO:0003824//GO:0016859	isomerase activity//peptidyl-prolyl cis-trans isomerase activity//molecular_function//catalytic activity//cis-trans isomerase activity	K09569 FK506-binding protein 2 [EC:5.2.1.8] | (RefSeq) peptidyl-prolyl cis-trans isomerase FKBP15-1-like	http://www.genome.jp/dbget-bin/www_bget?sot:102581304	-	FKBP-type peptidyl-prolyl cis-trans isomerase domain||Peptidyl-prolyl cis-trans isomerase, FKBP-type
218	PGSC0003DMG400008815	31.0338	1.5301	4.3421	0.00047384	0.0064017	UP	--	--	--	--	--	--	no KO assigned | (RefSeq) uncharacterized LOC102604803	http://www.genome.jp/dbget-bin/www_bget?sot:102604803	-	Zinc finger, RING/FYVE/PHD-type||DC1
219	PGSC0003DMG400008897	213.577	35.3596	2.5946	1.566e-08	9.0317e-07	UP	GO:0044237//GO:0016310//GO:0043170//GO:0006464//GO:0044267//GO:0044238//GO:0006468//GO:0036211//GO:0019538//GO:0008152//GO:0006793//GO:0071704//GO:0044260//GO:0043412//GO:0008150//GO:0009987//GO:0006796	cellular metabolic process//phosphorylation//macromolecule metabolic process//cellular protein modification process//cellular protein metabolic process//primary metabolic process//protein phosphorylation//protein modification process//protein metabolic process//metabolic process//phosphorus metabolic process//organic substance metabolic process//cellular macromolecule metabolic process//macromole…	GO:0044425//GO:0016021//GO:0031224//GO:0016020//GO:0005575	membrane part//integral component of membrane//intrinsic component of membrane//membrane//cellular_component	GO:0043168//GO:0032549//GO:0032559//GO:0005488//GO:1901265//GO:0097367//GO:0017076//GO:0001883//GO:0000166//GO:0001882//GO:0016772//GO:0004672//GO:0016773//GO:0032553//GO:0005524//GO:0016301//GO:0032550//GO:0035639//GO:0032555//GO:0043167//GO:0003674//GO:0036094//GO:0003824//GO:0030554//GO:1901363//GO:0016740//GO:0030246//GO:0097159	anion binding//ribonucleoside binding//adenyl ribonucleotide binding//binding//nucleoside phosphate binding//carbohydrate derivative binding//purine nucleotide binding//purine nucleoside binding//nucleotide binding//nucleoside binding//transferase activity, transferring phosphorus-containing groups//protein kinase activity//phosphotransferase activity, alcohol group as acceptor//ribonucleotide bi…	no KO assigned | (RefSeq) L-type lectin-domain containing receptor kinase IV.1-like	http://www.genome.jp/dbget-bin/www_bget?sot:102579814	-	Protein kinase, ATP binding site||Legume lectin, beta chain, Mn/Ca-binding site||Legume lectin domain||Protein kinase domain||Serine/threonine-protein kinase, active site||Protein kinase-like domain||Concanavalin A-like lectin/glucanase domain
220	PGSC0003DMG400009317	26680.9	12310.1	1.116	0.0016826	0.017366	UP	GO:0044238//GO:0044237//GO:0016310//GO:0008150//GO:0009987//GO:0006796//GO:0008152//GO:0006793//GO:0071704//GO:0005975	primary metabolic process//cellular metabolic process//phosphorylation//biological_process//cellular process//phosphate-containing compound metabolic process//metabolic process//phosphorus metabolic process//organic substance metabolic process//carbohydrate metabolic process	--	--	GO:0000166//GO:0001883//GO:0016772//GO:0001882//GO:0016773//GO:0043168//GO:0005488//GO:0032559//GO:0032549//GO:0097367//GO:1901265//GO:0017076//GO:1901363//GO:0008974//GO:0030554//GO:0003824//GO:0016740//GO:0097159//GO:0016301//GO:0005524//GO:0032553//GO:0032555//GO:0035639//GO:0032550//GO:0043167//GO:0036094//GO:0003674	nucleotide binding//purine nucleoside binding//transferase activity, transferring phosphorus-containing groups//nucleoside binding//phosphotransferase activity, alcohol group as acceptor//anion binding//binding//adenyl ribonucleotide binding//ribonucleoside binding//carbohydrate derivative binding//nucleoside phosphate binding//purine nucleotide binding//heterocyclic compound binding//phosphoribu…	K00855 phosphoribulokinase [EC:2.7.1.19] | (RefSeq) phosphoribulokinase, chloroplastic	http://www.genome.jp/dbget-bin/www_bget?sot:102591470	PRK	Phosphoribulokinase/uridine kinase||P-loop containing nucleoside triphosphate hydrolase||Phosphoribulokinase
221	PGSC0003DMG400009375	63.8334	5.77982	3.4652	0.0049199	0.039128	UP	--	--	GO:0016020//GO:0005575//GO:0031224//GO:0044425//GO:0016021	membrane//cellular_component//intrinsic component of membrane//membrane part//integral component of membrane	--	--	no KO assigned | (RefSeq) reticulon-like protein B17	http://www.genome.jp/dbget-bin/www_bget?sot:102584510	-	Reticulon
222	PGSC0003DMG400009401	453.767	196.933	1.2042	0.00090929	0.010847	UP	--	--	--	--	GO:0003924//GO:0043168//GO:0016817//GO:0032549//GO:0005488//GO:1901265//GO:0097367//GO:0017076//GO:0005525//GO:0001883//GO:0000166//GO:0001882//GO:0032561//GO:0017111//GO:0032553//GO:0016787//GO:0032550//GO:0035639//GO:0032555//GO:0043167//GO:0003674//GO:0016818//GO:0036094//GO:0003824//GO:1901363//GO:0019001//GO:0097159//GO:0016462	GTPase activity//anion binding//hydrolase activity, acting on acid anhydrides//ribonucleoside binding//binding//nucleoside phosphate binding//carbohydrate derivative binding//purine nucleotide binding//GTP binding//purine nucleoside binding//nucleotide binding//nucleoside binding//guanyl ribonucleotide binding//nucleoside-triphosphatase activity//ribonucleotide binding//hydrolase activity//purine…	K07904 Ras-related protein Rab-11A | (RefSeq) ras-related protein RABA1f	http://www.genome.jp/dbget-bin/www_bget?sot:102591005	-	P-loop containing nucleoside triphosphate hydrolase||Small GTP-binding protein domain||Small GTPase superfamily
223	PGSC0003DMG400009511	276.838	5.69296	5.6037	0.0038011	0.032281	UP	GO:0050790//GO:0010466//GO:0008152//GO:0006508//GO:0071704//GO:0010951//GO:0010605//GO:0044260//GO:0044092//GO:0051246//GO:0043086//GO:0031323//GO:0050789//GO:0008150//GO:0009987//GO:0080090//GO:0048519//GO:0044237//GO:0051336//GO:0009892//GO:0043170//GO:0030162//GO:0019222//GO:0032268//GO:0032269//GO:0044267//GO:0050794//GO:0051248//GO:0052548//GO:0060255//GO:0051346//GO:0065007//GO:0048523//GO:…	regulation of catalytic activity//negative regulation of peptidase activity//metabolic process//proteolysis//organic substance metabolic process//negative regulation of endopeptidase activity//negative regulation of macromolecule metabolic process//cellular macromolecule metabolic process//negative regulation of molecular function//regulation of protein metabolic process//negative regulation of c…	GO:0005737//GO:0043227//GO:0005575//GO:0043231//GO:0005773//GO:0043226//GO:0044424//GO:0043229//GO:0044444//GO:0005623//GO:0044464//GO:0005622	cytoplasm//membrane-bounded organelle//cellular_component//intracellular membrane-bounded organelle//vacuole//organelle//intracellular part//intracellular organelle//cytoplasmic part//cell//cell part//intracellular	GO:0004866//GO:0030234//GO:0016787//GO:0061134//GO:0003674//GO:0003824//GO:0004867//GO:0098772//GO:0030414//GO:0004857//GO:0008233//GO:0019828//GO:0061135	endopeptidase inhibitor activity//enzyme regulator activity//hydrolase activity//peptidase regulator activity//molecular_function//catalytic activity//serine-type endopeptidase inhibitor activity//molecular function regulator//peptidase inhibitor activity//enzyme inhibitor activity//peptidase activity//aspartic-type endopeptidase inhibitor activity//endopeptidase regulator activity	no KO assigned | (RefSeq) API, API-8, CathDinh, CathIhn, PI-8, PKPI-A4, pi8; aspartic protease inhibitor 8	http://www.genome.jp/dbget-bin/www_bget?sot:102604256	-	Proteinase inhibitor I3, Kunitz legume||Kunitz inhibitor ST1-like
224	PGSC0003DMG400009621	96.6856	17.3462	2.4787	7.5009e-05	0.0014439	UP	GO:0008152//GO:0055114//GO:0008150	metabolic process//oxidation-reduction process//biological_process	--	--	GO:0046872//GO:0004497//GO:0005488//GO:0046914//GO:0043169//GO:0016705//GO:0020037//GO:0003674//GO:0043167//GO:0005506//GO:0046906//GO:0097159//GO:0016491//GO:0003824//GO:1901363	metal ion binding//monooxygenase activity//binding//transition metal ion binding//cation binding//oxidoreductase activity, acting on paired donors, with incorporation or reduction of molecular oxygen//heme binding//molecular_function//ion binding//iron ion binding//tetrapyrrole binding//organic cyclic compound binding//oxidoreductase activity//catalytic activity//heterocyclic compound binding	no KO assigned | (RefSeq) premnaspirodiene oxygenase-like	http://www.genome.jp/dbget-bin/www_bget?sot:102603519	-	Cytochrome P450, E-class, group I||Cytochrome P450, conserved site||Cytochrome P450
225	PGSC0003DMG400009762	1404.56	594.894	1.2394	0.00013128	0.0022824	UP	GO:0008152//GO:0055114//GO:0008150	metabolic process//oxidation-reduction process//biological_process	GO:0016021//GO:0044425//GO:0031224//GO:0016020//GO:0005575	integral component of membrane//membrane part//intrinsic component of membrane//membrane//cellular_component	GO:0046872//GO:0005488//GO:0004497//GO:0043169//GO:0046914//GO:0020037//GO:0016705//GO:0043167//GO:0003674//GO:0046906//GO:0005506//GO:0097159//GO:1901363//GO:0003824//GO:0016491	metal ion binding//binding//monooxygenase activity//cation binding//transition metal ion binding//heme binding//oxidoreductase activity, acting on paired donors, with incorporation or reduction of molecular oxygen//ion binding//molecular_function//tetrapyrrole binding//iron ion binding//organic cyclic compound binding//heterocyclic compound binding//catalytic activity//oxidoreductase activity	K00512 steroid 17alpha-monooxygenase / 17alpha-hydroxyprogesterone deacetylase [EC:1.14.14.19 1.14.14.32] | (RefSeq) premnaspirodiene oxygenase-like	http://www.genome.jp/dbget-bin/www_bget?sot:102586257	-	Cytochrome P450, E-class, group I||Cytochrome P450||Cytochrome P450, conserved site
226	PGSC0003DMG400009822	680.32	69.8646	3.2836	0.00013017	0.0022671	UP	GO:0055114//GO:0008150//GO:0008152	oxidation-reduction process//biological_process//metabolic process	GO:0031224//GO:0016021//GO:0044425//GO:0005575//GO:0016020	intrinsic component of membrane//integral component of membrane//membrane part//cellular_component//membrane	GO:0046914//GO:0043169//GO:0016705//GO:0020037//GO:0046872//GO:0005488//GO:0004497//GO:0097159//GO:0016491//GO:1901363//GO:0003824//GO:0003674//GO:0043167//GO:0005506//GO:0046906	transition metal ion binding//cation binding//oxidoreductase activity, acting on paired donors, with incorporation or reduction of molecular oxygen//heme binding//metal ion binding//binding//monooxygenase activity//organic cyclic compound binding//oxidoreductase activity//heterocyclic compound binding//catalytic activity//molecular_function//ion binding//iron ion binding//tetrapyrrole binding	K20562 biphenyl-4-hydroxylase | (RefSeq) cytochrome P450 CYP736A12-like	http://www.genome.jp/dbget-bin/www_bget?sot:102585176	-	Cytochrome P450, conserved site||Cytochrome P450||Cytochrome P450, E-class, group I
227	PGSC0003DMG400009873	2096.97	869.595	1.2699	0.0010961	0.012488	UP	--	--	--	--	GO:0032553//GO:0005524//GO:0035639//GO:0032555//GO:0016787//GO:0032550//GO:0043167//GO:0003674//GO:0016818//GO:0036094//GO:0003676//GO:1901363//GO:0003824//GO:0030554//GO:0016462//GO:0004386//GO:0097159//GO:0043168//GO:0005488//GO:0016817//GO:0032549//GO:0032559//GO:0097367//GO:1901265//GO:0017076//GO:0000166//GO:0001883//GO:0001882//GO:0017111	ribonucleotide binding//ATP binding//purine ribonucleoside triphosphate binding//purine ribonucleotide binding//hydrolase activity//purine ribonucleoside binding//ion binding//molecular_function//hydrolase activity, acting on acid anhydrides, in phosphorus-containing anhydrides//small molecule binding//nucleic acid binding//heterocyclic compound binding//catalytic activity//adenyl nucleotide bind…	K13181 ATP-dependent RNA helicase DDX27 [EC:3.6.4.13] | (RefSeq) DEAD-box ATP-dependent RNA helicase 28	http://www.genome.jp/dbget-bin/www_bget?sot:102602227	-	P-loop containing nucleoside triphosphate hydrolase||RNA helicase, DEAD-box type, Q motif||Helicase, C-terminal||Helicase superfamily 1/2, ATP-binding domain||DEAD/DEAH box helicase domain||ATP-dependent RNA helicase DEAD-box, conserved site
228	PGSC0003DMG400009940	23084.3	9138.14	1.3369	3.3934e-05	0.00074617	UP	GO:0009409//GO:0071704//GO:0048507//GO:0051649//GO:0009933//GO:0044260//GO:0033036//GO:0022603//GO:0009651//GO:0008152//GO:0048638//GO:0051641//GO:0071702//GO:0034976//GO:0009306//GO:0046903//GO:0009987//GO:0032940//GO:0033554//GO:0040007//GO:0010035//GO:0032502//GO:0006457//GO:0001101//GO:0009653//GO:0050793//GO:0051234//GO:0051239//GO:0006810//GO:0042221//GO:0008150//GO:0010038//GO:2000026//GO:…	response to cold//organic substance metabolic process//meristem development//establishment of localization in cell//meristem structural organization//cellular macromolecule metabolic process//macromolecule localization//regulation of anatomical structure morphogenesis//response to salt stress//metabolic process//regulation of developmental growth//cellular localization//organic substance transpor…	GO:0016020//GO:0005886//GO:0043227//GO:0098588//GO:0005739//GO:0005575//GO:0043231//GO:0098805//GO:0005737//GO:0071944//GO:0009507//GO:0043226//GO:0030054//GO:0009536//GO:0055044//GO:0005783//GO:0005773//GO:0031090//GO:0048046//GO:0044422//GO:0044446//GO:0043229//GO:0005774//GO:0005911//GO:0044424//GO:0009506//GO:0012505//GO:0044464//GO:0005622//GO:0044437//GO:0005576//GO:0005634//GO:0044444//GO:…	membrane//plasma membrane//membrane-bounded organelle//bounding membrane of organelle//mitochondrion//cellular_component//intracellular membrane-bounded organelle//whole membrane//cytoplasm//cell periphery//chloroplast//organelle//cell junction//plastid//symplast//endoplasmic reticulum//vacuole//organelle membrane//apoplast//organelle part//intracellular organelle part//intracellular organelle//v…	GO:0043167//GO:0003674//GO:0016818//GO:0036094//GO:0032553//GO:0005524//GO:0051082//GO:0016787//GO:0032550//GO:0035639//GO:0032555//GO:0097159//GO:0016462//GO:0003824//GO:0030554//GO:1901363//GO:1901265//GO:0097367//GO:0017076//GO:0043168//GO:0016817//GO:0032549//GO:0032559//GO:0005488//GO:0017111//GO:0005515//GO:0001883//GO:0016887//GO:0000166//GO:0001882	ion binding//molecular_function//hydrolase activity, acting on acid anhydrides, in phosphorus-containing anhydrides//small molecule binding//ribonucleotide binding//ATP binding//unfolded protein binding//hydrolase activity//purine ribonucleoside binding//purine ribonucleoside triphosphate binding//purine ribonucleotide binding//organic cyclic compound binding//pyrophosphatase activity//catalytic …	K09487 heat shock protein 90kDa beta | (RefSeq) endoplasmin homolog	http://www.genome.jp/dbget-bin/www_bget?sot:102601892	SHD	Ribosomal protein S5 domain 2-type fold||Heat shock protein Hsp90, conserved site||Heat shock protein Hsp90, N-terminal||Histidine kinase-like ATPase, C-terminal domain||Heat shock protein Hsp90 family
229	PGSC0003DMG400009951	503.859	89.0978	2.4996	0.0027674	0.025342	UP	GO:0071669//GO:0009664//GO:0009987//GO:0008150//GO:0071555//GO:0045229//GO:0071840//GO:0071554//GO:0016043	plant-type cell wall organization or biogenesis//plant-type cell wall organization//cellular process//biological_process//cell wall organization//external encapsulating structure organization//cellular component organization or biogenesis//cell wall organization or biogenesis//cellular component organization	GO:0005575//GO:0016020//GO:0071944//GO:0030312//GO:0005576//GO:0044464//GO:0005623//GO:0005618	cellular_component//membrane//cell periphery//external encapsulating structure//extracellular region//cell part//cell//cell wall	--	--	no KO assigned | (RefSeq) EXPA1; expansin-A11	http://www.genome.jp/dbget-bin/www_bget?sot:102577499	-	Expansin/pollen allergen, DPBB domain||Expansin, cellulose-binding-like domain||RlpA-like protein, double-psi beta-barrel domain||Expansin/Lol pI||Expansin
230	PGSC0003DMG400010022	3826.32	1162.93	1.7182	0.0023564	0.022505	UP	GO:0009056//GO:0016042//GO:0008150//GO:0071704//GO:0008152//GO:0044238//GO:1901575//GO:0006629	catabolic process//lipid catabolic process//biological_process//organic substance metabolic process//metabolic process//primary metabolic process//organic substance catabolic process//lipid metabolic process	--	--	GO:0003824//GO:0003674//GO:0016787	catalytic activity//molecular_function//hydrolase activity	no KO assigned | (RefSeq) patatin-like protein 3	http://www.genome.jp/dbget-bin/www_bget?sot:102589148	-	Patatin-like phospholipase domain||Acyl transferase/acyl hydrolase/lysophospholipase
231	PGSC0003DMG400010077	126.166	41.1825	1.6152	0.0019557	0.019555	UP	GO:0071704//GO:0006508//GO:0008152//GO:0008150//GO:0043170//GO:0019538//GO:0044238	organic substance metabolic process//proteolysis//metabolic process//biological_process//macromolecule metabolic process//protein metabolic process//primary metabolic process	GO:0005575//GO:0016020	cellular_component//membrane	GO:0003674//GO:0008236//GO:0016787//GO:0004175//GO:0004252//GO:0070011//GO:0017171//GO:0003824//GO:0008233//GO:0008238//GO:0070008	molecular_function//serine-type peptidase activity//hydrolase activity//endopeptidase activity//serine-type endopeptidase activity//peptidase activity, acting on L-amino acid peptides//serine hydrolase activity//catalytic activity//peptidase activity//exopeptidase activity//serine-type exopeptidase activity	no KO assigned | (RefSeq) protease 2	http://www.genome.jp/dbget-bin/www_bget?sot:102600724	-	Peptidase S9A, prolyl oligopeptidase||Peptidase S9, prolyl oligopeptidase, catalytic domain||Peptidase S9A, N-terminal domain||Alpha/Beta hydrolase fold
232	PGSC0003DMG400010115	3003.26	1322.17	1.1836	1.0053e-05	0.00026434	UP	--	--	--	--	--	--	no KO assigned | (RefSeq) protein SRC2 homolog	http://www.genome.jp/dbget-bin/www_bget?sot:102581444	-	C2 domain
233	PGSC0003DMG400010117	6608.79	2566.25	1.3647	2.5691e-07	1.0976e-05	UP	--	--	--	--	GO:0016747//GO:0016740//GO:0003824//GO:0016746//GO:0003674	transferase activity, transferring acyl groups other than amino-acyl groups//transferase activity//catalytic activity//transferase activity, transferring acyl groups//molecular_function	K19747 BAHD acyltransferase [EC:2.3.1.-] | (RefSeq) BAHD acyltransferase DCR	http://www.genome.jp/dbget-bin/www_bget?sot:102581988	EMB3009	Transferase
234	PGSC0003DMG400010152	4835.46	2362.77	1.0332	0.00010233	0.0018696	UP	GO:0044237//GO:0006464//GO:0009059//GO:0043170//GO:0043413//GO:0009101//GO:1901135//GO:0044267//GO:0019538//GO:0009058//GO:0036211//GO:0044238//GO:1901137//GO:0008152//GO:0005975//GO:0044260//GO:1901576//GO:0034645//GO:0071704//GO:0006486//GO:0044249//GO:0008150//GO:0043412//GO:0009100//GO:0070085//GO:0009987	cellular metabolic process//cellular protein modification process//macromolecule biosynthetic process//macromolecule metabolic process//macromolecule glycosylation//glycoprotein biosynthetic process//carbohydrate derivative metabolic process//cellular protein metabolic process//protein metabolic process//biosynthetic process//protein modification process//primary metabolic process//carbohydrate d…	GO:0044425//GO:0016021//GO:0031224//GO:0005575//GO:0016020	membrane part//integral component of membrane//intrinsic component of membrane//cellular_component//membrane	GO:0016758//GO:0016757//GO:0003674//GO:0004576//GO:0016740//GO:0003824	transferase activity, transferring hexosyl groups//transferase activity, transferring glycosyl groups//molecular_function//oligosaccharyl transferase activity//transferase activity//catalytic activity	K07151 dolichyl-diphosphooligosaccharide--protein glycosyltransferase [EC:2.4.99.18] | (RefSeq) dolichyl-diphosphooligosaccharide--protein glycosyltransferase subunit STT3B	http://www.genome.jp/dbget-bin/www_bget?sot:102599835	STT3B	-||Oligosaccharyl transferase, STT3 subunit
235	PGSC0003DMG400010460	359.64	147.135	1.2894	0.00052948	0.0069856	UP	GO:0006464//GO:0016310//GO:0043170//GO:0044237//GO:0019538//GO:0006468//GO:0044238//GO:0036211//GO:0044267//GO:0044260//GO:0071704//GO:0006793//GO:0008152//GO:0006796//GO:0009987//GO:0008150//GO:0043412	cellular protein modification process//phosphorylation//macromolecule metabolic process//cellular metabolic process//protein metabolic process//protein phosphorylation//primary metabolic process//protein modification process//cellular protein metabolic process//cellular macromolecule metabolic process//organic substance metabolic process//phosphorus metabolic process//metabolic process//phosphate…	--	--	GO:0017076//GO:1901265//GO:0097367//GO:0032559//GO:0032549//GO:0005488//GO:0043168//GO:0016773//GO:0004674//GO:0001882//GO:0016772//GO:0004672//GO:0001883//GO:0000166//GO:0003674//GO:0036094//GO:0043167//GO:0032550//GO:0035639//GO:0032555//GO:0032553//GO:0005524//GO:0016301//GO:0097159//GO:0016740//GO:0030554//GO:0003824//GO:1901363	purine nucleotide binding//nucleoside phosphate binding//carbohydrate derivative binding//adenyl ribonucleotide binding//ribonucleoside binding//binding//anion binding//phosphotransferase activity, alcohol group as acceptor//protein serine/threonine kinase activity//nucleoside binding//transferase activity, transferring phosphorus-containing groups//protein kinase activity//purine nucleoside bind…	no KO assigned | (RefSeq) putative serine/threonine-protein kinase	http://www.genome.jp/dbget-bin/www_bget?sot:102582446	-	Serine/threonine-protein kinase, active site||Protein kinase, ATP binding site||Protein kinase domain||Protein kinase-like domain
236	PGSC0003DMG400010462	213.892	70.6009	1.5991	0.00011046	0.001984	UP	--	--	--	--	GO:0005488//GO:0005515//GO:0003674//GO:0051087	binding//protein binding//molecular_function//chaperone binding	no KO assigned | (RefSeq) BAG family molecular chaperone regulator 5, mitochondrial	http://www.genome.jp/dbget-bin/www_bget?sot:102601136	-	IQ motif, EF-hand binding site||BAG domain
237	PGSC0003DMG400010512	50.0151	7.83627	2.6741	0.0012091	0.013473	UP	--	--	--	--	--	--	no KO assigned | (RefSeq) uncharacterized LOC102584466	http://www.genome.jp/dbget-bin/www_bget?sot:102584466	-	Vacuolar protein sorting-associated protein 62
238	PGSC0003DMG400010665	1019.49	476.884	1.0961	0.00020407	0.0032573	UP	GO:0044267//GO:0036211//GO:0006468//GO:0044238//GO:0019538//GO:0044237//GO:0016310//GO:0043170//GO:0006464//GO:0043412//GO:0008150//GO:0009987//GO:0006796//GO:0008152//GO:0006793//GO:0071704//GO:0044260	cellular protein metabolic process//protein modification process//protein phosphorylation//primary metabolic process//protein metabolic process//cellular metabolic process//phosphorylation//macromolecule metabolic process//cellular protein modification process//macromolecule modification//biological_process//cellular process//phosphate-containing compound metabolic process//metabolic process//pho…	--	--	GO:0001883//GO:0000166//GO:0016772//GO:0001882//GO:0004672//GO:0016773//GO:0043168//GO:0032549//GO:0032559//GO:0005488//GO:1901265//GO:0097367//GO:0017076//GO:0003824//GO:0030554//GO:1901363//GO:0016740//GO:0097159//GO:0005524//GO:0032553//GO:0016301//GO:0032550//GO:0032555//GO:0035639//GO:0043167//GO:0036094//GO:0003674	purine nucleoside binding//nucleotide binding//transferase activity, transferring phosphorus-containing groups//nucleoside binding//protein kinase activity//phosphotransferase activity, alcohol group as acceptor//anion binding//ribonucleoside binding//adenyl ribonucleotide binding//binding//nucleoside phosphate binding//carbohydrate derivative binding//purine nucleotide binding//catalytic activit…	K08819 cyclin-dependent kinase 12/13 [EC:2.7.11.22 2.7.11.23] | (RefSeq) probable serine/threonine-protein kinase At1g54610	http://www.genome.jp/dbget-bin/www_bget?sot:102590828	-	Serine/threonine-protein kinase, active site||Protein kinase, ATP binding site||Protein kinase domain||Protein kinase-like domain
239	PGSC0003DMG400010698	761.379	359.283	1.0835	0.00042953	0.0058993	UP	--	--	--	--	GO:0009055//GO:0003674//GO:0051537//GO:0005488//GO:0051540//GO:0051536	electron transfer activity//molecular_function//2 iron, 2 sulfur cluster binding//binding//metal cluster binding//iron-sulfur cluster binding	no KO assigned | (RefSeq) adrenodoxin-like protein 2, mitochondrial	http://www.genome.jp/dbget-bin/www_bget?sot:102598716	-	2Fe-2S ferredoxin-type iron-sulfur binding domain||Adrenodoxin||Beta-grasp domain||Adrenodoxin, iron-sulphur binding site
240	PGSC0003DMG400010735	601.691	250.926	1.2618	7.4765e-05	0.001441	UP	GO:0008150//GO:0008152//GO:0032259	biological_process//metabolic process//methylation	GO:0005575//GO:0016020//GO:0031224//GO:0044425//GO:0016021	cellular_component//membrane//intrinsic component of membrane//membrane part//integral component of membrane	GO:0016740//GO:0003824//GO:0016741//GO:0003674//GO:0008168	transferase activity//catalytic activity//transferase activity, transferring one-carbon groups//molecular_function//methyltransferase activity	no KO assigned | (RefSeq) uncharacterized LOC102597043	http://www.genome.jp/dbget-bin/www_bget?sot:102597043	-	Methyltransferase type 11||S-adenosyl-L-methionine-dependent methyltransferase
241	PGSC0003DMG400010892	52.2974	0.574682	6.5078	0.0016885	0.017403	UP	--	--	--	--	--	--	K10727 chromatin licensing and DNA replication factor 1 | (RefSeq) CDT1-like protein a, chloroplastic	http://www.genome.jp/dbget-bin/www_bget?sot:102583611	-	DNA replication factor Cdt1, C-terminal||Winged helix-turn-helix DNA-binding domain||CDT1 Geminin-binding domain-like
242	PGSC0003DMG400010900	243.104	114.472	1.0866	0.0048671	0.038897	UP	GO:0008150//GO:0008152	biological_process//metabolic process	--	--	GO:0016740//GO:0016747//GO:0003824//GO:0003674//GO:0016746	transferase activity//transferase activity, transferring acyl groups other than amino-acyl groups//catalytic activity//molecular_function//transferase activity, transferring acyl groups	K00626 acetyl-CoA C-acetyltransferase [EC:2.3.1.9] | (RefSeq) acetyl-CoA acetyltransferase, cytosolic 1	http://www.genome.jp/dbget-bin/www_bget?sot:102601957	-	Thiolase, N-terminal||Thiolase||Thiolase, C-terminal||Thiolase, conserved site||Thiolase, active site||Thiolase-like
243	PGSC0003DMG400010950	138.523	18.1802	2.9297	1.4862e-07	6.8069e-06	UP	--	--	--	--	--	--	no KO assigned | (RefSeq) LRR receptor-like serine/threonine-protein kinase RCH1	http://www.genome.jp/dbget-bin/www_bget?sot:102590100	-	Leucine-rich repeat domain, L domain-like||Leucine-rich repeat, typical subtype||Leucine-rich repeat
244	PGSC0003DMG400011027	113.841	18.3637	2.6321	8.9898e-06	0.00024148	UP	GO:0008152//GO:0008150	metabolic process//biological_process	--	--	GO:0016757//GO:0003674//GO:0016740//GO:0003824//GO:0016758	transferase activity, transferring glycosyl groups//molecular_function//transferase activity//catalytic activity//transferase activity, transferring hexosyl groups	no KO assigned | (RefSeq) UDP-glucose iridoid glucosyltransferase-like	http://www.genome.jp/dbget-bin/www_bget?sot:102606006	-	UDP-glycosyltransferase family, conserved site||UDP-glucuronosyl/UDP-glucosyltransferase
245	PGSC0003DMG400011189	6465.23	2100.85	1.6217	9.0403e-07	3.3034e-05	UP	--	--	--	--	GO:0016747//GO:0016740//GO:0003824//GO:0016746//GO:0003674	transferase activity, transferring acyl groups other than amino-acyl groups//transferase activity//catalytic activity//transferase activity, transferring acyl groups//molecular_function	K13065 shikimate O-hydroxycinnamoyltransferase [EC:2.3.1.133] | (RefSeq) HQT	http://www.genome.jp/dbget-bin/www_bget?sot:102577662	-	Transferase
246	PGSC0003DMG400011246	2267.16	746.589	1.6025	8.4244e-09	5.1686e-07	UP	GO:0019318//GO:0055114//GO:0008150//GO:0071704//GO:0006006//GO:0005975//GO:0008152//GO:0044238//GO:0005996	hexose metabolic process//oxidation-reduction process//biological_process//organic substance metabolic process//glucose metabolic process//carbohydrate metabolic process//metabolic process//primary metabolic process//monosaccharide metabolic process	--	--	GO:0050662//GO:0097159//GO:1901363//GO:0016620//GO:0003824//GO:0016491//GO:0036094//GO:0003674//GO:0016903//GO:0000166//GO:1901265//GO:0048037//GO:0005488//GO:0050661//GO:0051287	coenzyme binding//organic cyclic compound binding//heterocyclic compound binding//oxidoreductase activity, acting on the aldehyde or oxo group of donors, NAD or NADP as acceptor//catalytic activity//oxidoreductase activity//small molecule binding//molecular_function//oxidoreductase activity, acting on the aldehyde or oxo group of donors//nucleotide binding//nucleoside phosphate binding//cofactor …	K00134 glyceraldehyde 3-phosphate dehydrogenase [EC:1.2.1.12] | (RefSeq) glyceraldehyde-3-phosphate dehydrogenase GAPCP1, chloroplastic-like	http://www.genome.jp/dbget-bin/www_bget?sot:102589564	-	Glyceraldehyde/Erythrose phosphate dehydrogenase family||Glyceraldehyde 3-phosphate dehydrogenase, NAD(P) binding domain||Glyceraldehyde 3-phosphate dehydrogenase, active site||Glyceraldehyde 3-phosphate dehydrogenase, catalytic domain||Glyceraldehyde-3-phosphate dehydrogenase, type I||NAD(P)-binding domain
247	PGSC0003DMG400011273	223.346	103.719	1.1066	0.0049446	0.03919	UP	GO:0043170//GO:0006464//GO:0006470//GO:0044237//GO:0044238//GO:0036211//GO:0016311//GO:0019538//GO:0044267//GO:0071704//GO:0044260//GO:0008152//GO:0006793//GO:0009987//GO:0006796//GO:0043412//GO:0008150	macromolecule metabolic process//cellular protein modification process//protein dephosphorylation//cellular metabolic process//primary metabolic process//protein modification process//dephosphorylation//protein metabolic process//cellular protein metabolic process//organic substance metabolic process//cellular macromolecule metabolic process//metabolic process//phosphorus metabolic process//cellu…	--	--	GO:0042578//GO:0003674//GO:0016791//GO:0016787//GO:0004721//GO:0003824//GO:0016788//GO:0004722	phosphoric ester hydrolase activity//molecular_function//phosphatase activity//hydrolase activity//phosphoprotein phosphatase activity//catalytic activity//hydrolase activity, acting on ester bonds//protein serine/threonine phosphatase activity	no KO assigned | (RefSeq) probable protein phosphatase 2C 6	http://www.genome.jp/dbget-bin/www_bget?sot:102585731	-	PPM-type phosphatase domain||Protein phosphatase 2C family
248	PGSC0003DMG400011294	92.7637	4.77117	4.2811	5.0077e-09	3.253e-07	UP	GO:0009987//GO:0051171//GO:1901362//GO:0080090//GO:0044249//GO:0031323//GO:0050789//GO:0009889//GO:2000112//GO:0006355//GO:0008150//GO:0031326//GO:0019438//GO:2001141//GO:0044260//GO:1901576//GO:0034645//GO:0006351//GO:0097659//GO:0071704//GO:0006725//GO:1903506//GO:0008152//GO:0051252//GO:0010467//GO:0009058//GO:0006807//GO:0044238//GO:0046483//GO:0090304//GO:0034641//GO:0016070//GO:0065007//GO:…	cellular process//regulation of nitrogen compound metabolic process//organic cyclic compound biosynthetic process//regulation of primary metabolic process//cellular biosynthetic process//regulation of cellular metabolic process//regulation of biological process//regulation of biosynthetic process//regulation of cellular macromolecule biosynthetic process//regulation of transcription, DNA-template…	GO:0043226//GO:0043231//GO:0005575//GO:0043227//GO:0005634//GO:0005622//GO:0044464//GO:0005623//GO:0043229//GO:0044424	organelle//intracellular membrane-bounded organelle//cellular_component//membrane-bounded organelle//nucleus//intracellular//cell part//cell//intracellular organelle//intracellular part	GO:0097159//GO:1901363//GO:0003676//GO:0003674//GO:0003677//GO:0005488	organic cyclic compound binding//heterocyclic compound binding//nucleic acid binding//molecular_function//DNA binding//binding	K12133 MYB-related transcription factor LHY | (RefSeq) protein LHY	http://www.genome.jp/dbget-bin/www_bget?sot:102601616	-	Homeobox domain-like||SANT/Myb domain||Myb domain||Myb domain, plants
249	PGSC0003DMG400011317	38.909	2.05808	4.2407	0.0015656	0.016477	UP	--	--	GO:0016020//GO:0005575//GO:0031224//GO:0016021//GO:0044425	membrane//cellular_component//intrinsic component of membrane//integral component of membrane//membrane part	--	--	no KO assigned | (RefSeq) uncharacterized LOC102583917	http://www.genome.jp/dbget-bin/www_bget?sot:102583917	--	--
250	PGSC0003DMG400011358	909.58	426.542	1.0925	0.0017861	0.018238	UP	--	--	GO:0005623//GO:0044444//GO:0010598//GO:0009534//GO:0044434//GO:0031224//GO:0044464//GO:0005622//GO:0044425//GO:0044424//GO:0055035//GO:0042651//GO:0044435//GO:0009535//GO:0016021//GO:0044422//GO:0044446//GO:0043229//GO:0044436//GO:0009536//GO:0098796//GO:0031976//GO:0043226//GO:0009579//GO:0034357//GO:0005737//GO:0009507//GO:0031984//GO:0043227//GO:0016020//GO:0032991//GO:0005575//GO:0043231	cell//cytoplasmic part//NAD(P)H dehydrogenase complex (plastoquinone)//chloroplast thylakoid//chloroplast part//intrinsic component of membrane//cell part//intracellular//membrane part//intracellular part//plastid thylakoid membrane//thylakoid membrane//plastid part//chloroplast thylakoid membrane//integral component of membrane//organelle part//intracellular organelle part//intracellular organel…	--	--	no KO assigned | (RefSeq) NAD(P)H-quinone oxidoreductase subunit T, chloroplastic	http://www.genome.jp/dbget-bin/www_bget?sot:102580011	-	DnaJ domain||DnaJ domain, conserved site
251	PGSC0003DMG400011640	4487.56	1460.15	1.6198	8.546e-07	3.1733e-05	UP	GO:0042744//GO:0008152//GO:0006979//GO:0008150//GO:0009987//GO:0044248//GO:0055114//GO:0009056//GO:0044237//GO:0006950//GO:0050896//GO:0072593//GO:0042743	hydrogen peroxide catabolic process//metabolic process//response to oxidative stress//biological_process//cellular process//cellular catabolic process//oxidation-reduction process//catabolic process//cellular metabolic process//response to stress//response to stimulus//reactive oxygen species metabolic process//hydrogen peroxide metabolic process	GO:0005575//GO:0005576	cellular_component//extracellular region	GO:0004601//GO:0046906//GO:0043167//GO:0003674//GO:1901363//GO:0003824//GO:0016684//GO:0016491//GO:0097159//GO:0005488//GO:0046872//GO:0020037//GO:0043169//GO:0016209	peroxidase activity//tetrapyrrole binding//ion binding//molecular_function//heterocyclic compound binding//catalytic activity//oxidoreductase activity, acting on peroxide as acceptor//oxidoreductase activity//organic cyclic compound binding//binding//metal ion binding//heme binding//cation binding//antioxidant activity	K00430 peroxidase [EC:1.11.1.7] | (RefSeq) peroxidase P7-like	http://www.genome.jp/dbget-bin/www_bget?sot:102582282	-	Peroxidase, active site||Haem peroxidase||Plant peroxidase||Peroxidases heam-ligand binding site||Secretory peroxidase||Haem peroxidase, plant/fungal/bacterial
252	PGSC0003DMG400011775	139.93	0	Inf	0.00045508	0.0061824	UP	GO:0008150//GO:0008152	biological_process//metabolic process	--	--	GO:0043169//GO:0005488//GO:0010333//GO:0016838//GO:0046872//GO:0016835//GO:0003824//GO:0016829//GO:0000287//GO:0003674//GO:0043167	cation binding//binding//terpene synthase activity//carbon-oxygen lyase activity, acting on phosphates//metal ion binding//carbon-oxygen lyase activity//catalytic activity//lyase activity//magnesium ion binding//molecular_function//ion binding	K15803 (-)-germacrene D synthase [EC:4.2.3.22 4.2.3.75] | (RefSeq) (E,E)-germacrene B synthase-like	http://www.genome.jp/dbget-bin/www_bget?sot:102582072	-	Isoprenoid synthase domain||Terpene synthase, metal-binding domain||Terpenoid cyclases/protein prenyltransferase alpha-alpha toroid||Terpene synthase, N-terminal domain
253	PGSC0003DMG400011837	559.894	67.9213	3.0432	0.0059796	0.045185	UP	GO:0051276//GO:0008152//GO:0006270//GO:0071704//GO:0034645//GO:0006725//GO:0032392//GO:1901576//GO:0044260//GO:0006261//GO:0044249//GO:0032508//GO:0008150//GO:0009987//GO:0006260//GO:0044237//GO:0006139//GO:1901360//GO:0043170//GO:0009059//GO:0034641//GO:0071103//GO:0006259//GO:0046483//GO:0044238//GO:0016043//GO:0090304//GO:0071840//GO:0006996//GO:0009058//GO:0006807	chromosome organization//metabolic process//DNA replication initiation//organic substance metabolic process//cellular macromolecule biosynthetic process//cellular aromatic compound metabolic process//DNA geometric change//organic substance biosynthetic process//cellular macromolecule metabolic process//DNA-dependent DNA replication//cellular biosynthetic process//DNA duplex unwinding//biological_…	GO:0032991//GO:0043227//GO:0043231//GO:0005575//GO:0043226//GO:0044424//GO:0042555//GO:0043229//GO:0005623//GO:0044464//GO:0005634//GO:0005622	protein-containing complex//membrane-bounded organelle//intracellular membrane-bounded organelle//cellular_component//organelle//intracellular part//MCM complex//intracellular organelle//cell//cell part//nucleus//intracellular	GO:0005524//GO:0032553//GO:0032555//GO:0035639//GO:0016787//GO:0032550//GO:0043167//GO:0003688//GO:0016818//GO:0036094//GO:0003674//GO:1901363//GO:0003676//GO:0030554//GO:0003824//GO:0043565//GO:0004386//GO:0016462//GO:0097159//GO:0043168//GO:0005488//GO:0032559//GO:0016817//GO:0032549//GO:0097367//GO:1901265//GO:0017076//GO:0003677//GO:0000166//GO:0001883//GO:0003682//GO:0001882//GO:0044877//GO:…	ATP binding//ribonucleotide binding//purine ribonucleotide binding//purine ribonucleoside triphosphate binding//hydrolase activity//purine ribonucleoside binding//ion binding//DNA replication origin binding//hydrolase activity, acting on acid anhydrides, in phosphorus-containing anhydrides//small molecule binding//molecular_function//heterocyclic compound binding//nucleic acid binding//adenyl nuc…	K02209 DNA replication licensing factor MCM5 [EC:3.6.4.12] | (RefSeq) DNA replication licensing factor MCM5	http://www.genome.jp/dbget-bin/www_bget?sot:102602572	MCM5	MCM N-terminal domain||DNA replication licensing factor Mcm||Mini-chromosome maintenance protein||MCM domain||Nucleic acid-binding, OB-fold||MCM OB domain||P-loop containing nucleoside triphosphate hydrolase||Mini-chromosome maintenance, conserved site
254	PGSC0003DMG400011872	725.808	340.343	1.0926	0.0055238	0.042647	UP	--	--	GO:0031224//GO:0016021//GO:0044425//GO:0016020//GO:0005575	intrinsic component of membrane//integral component of membrane//membrane part//membrane//cellular_component	--	--	no KO assigned | (RefSeq) putative glucuronosyltransferase PGSIP8	http://www.genome.jp/dbget-bin/www_bget?sot:102600686	-	Nucleotide-diphospho-sugar transferases
255	PGSC0003DMG400011873	196.341	49.384	1.9912	9.0235e-06	0.00024195	UP	--	--	--	--	GO:0005488//GO:0003674//GO:0097159//GO:1901363//GO:0003676	binding//molecular_function//organic cyclic compound binding//heterocyclic compound binding//nucleic acid binding	no KO assigned | (RefSeq) zinc finger protein ZAT1	http://www.genome.jp/dbget-bin/www_bget?sot:102593706	-	Zinc finger C2H2-type
256	PGSC0003DMG400011876	824.835	273.895	1.5905	3.0094e-06	9.2507e-05	UP	GO:0006796//GO:0009987//GO:0008150//GO:0043412//GO:0044260//GO:0071704//GO:0006793//GO:0008152//GO:0019538//GO:0036211//GO:0044238//GO:0006468//GO:0044267//GO:0006464//GO:0016310//GO:0043170//GO:0044237	phosphate-containing compound metabolic process//cellular process//biological_process//macromolecule modification//cellular macromolecule metabolic process//organic substance metabolic process//phosphorus metabolic process//metabolic process//protein metabolic process//protein modification process//primary metabolic process//protein phosphorylation//cellular protein metabolic process//cellular pr…	--	--	GO:0097159//GO:0016740//GO:0030554//GO:0003824//GO:1901363//GO:0036094//GO:0003674//GO:0043167//GO:0032550//GO:0032555//GO:0035639//GO:0005524//GO:0032553//GO:0016301//GO:0016773//GO:0016772//GO:0001882//GO:0004672//GO:0001883//GO:0000166//GO:0017076//GO:1901265//GO:0097367//GO:0032559//GO:0032549//GO:0005488//GO:0043168	organic cyclic compound binding//transferase activity//adenyl nucleotide binding//catalytic activity//heterocyclic compound binding//small molecule binding//molecular_function//ion binding//purine ribonucleoside binding//purine ribonucleotide binding//purine ribonucleoside triphosphate binding//ATP binding//ribonucleotide binding//kinase activity//phosphotransferase activity, alcohol group as acc…	no KO assigned | (RefSeq) non-functional pseudokinase ZED1-like	http://www.genome.jp/dbget-bin/www_bget?sot:102598154	-	Protein kinase-like domain||Protein kinase domain
257	PGSC0003DMG400011910	631.449	156.644	2.0112	2.2913e-09	1.6113e-07	UP	--	--	--	--	--	--	K06911 uncharacterized protein | (RefSeq) pirin-like protein	http://www.genome.jp/dbget-bin/www_bget?sot:102581408	-	Pirin, C-terminal domain||RmlC-like jelly roll fold||Pirin||RmlC-like cupin domain||Pirin, N-terminal domain
258	PGSC0003DMG400011926	1168.09	481.131	1.2796	8.7025e-06	0.00023461	UP	GO:0008150//GO:0006950//GO:0006952//GO:0050896	biological_process//response to stress//defense response//response to stimulus	--	--	GO:0032550//GO:0032555//GO:0043531//GO:0032553//GO:0036094//GO:0003674//GO:0043167//GO:0030554//GO:1901363//GO:0097159//GO:0032549//GO:0032559//GO:0005488//GO:0043168//GO:0017076//GO:1901265//GO:0097367//GO:0001882//GO:0001883//GO:0000166	purine ribonucleoside binding//purine ribonucleotide binding//ADP binding//ribonucleotide binding//small molecule binding//molecular_function//ion binding//adenyl nucleotide binding//heterocyclic compound binding//organic cyclic compound binding//ribonucleoside binding//adenyl ribonucleotide binding//binding//anion binding//purine nucleotide binding//nucleoside phosphate binding//carbohydrate der…	no KO assigned | (RefSeq) disease resistance protein RPP13-like	http://www.genome.jp/dbget-bin/www_bget?sot:102595605	-	Leucine-rich repeat domain, L domain-like||NB-ARC||P-loop containing nucleoside triphosphate hydrolase||Winged helix-turn-helix DNA-binding domain
259	PGSC0003DMG400011950	1721.77	785.269	1.1326	0.001538	0.01625	UP	GO:0009987//GO:0055114//GO:0008150//GO:0022900//GO:0008152//GO:0006091//GO:0044237	cellular process//oxidation-reduction process//biological_process//electron transport chain//metabolic process//generation of precursor metabolites and energy//cellular metabolic process	GO:0043226//GO:0009536//GO:0043227//GO:0005575//GO:0043231//GO:0005737//GO:0009507//GO:0044464//GO:0005622//GO:0005623//GO:0044444//GO:0043229//GO:0044424	organelle//plastid//membrane-bounded organelle//cellular_component//intracellular membrane-bounded organelle//cytoplasm//chloroplast//cell part//intracellular//cell//cytoplasmic part//intracellular organelle//intracellular part	GO:0051537//GO:0043167//GO:0003674//GO:0009055//GO:0043169//GO:0051536//GO:0051540//GO:0046872//GO:0005488	2 iron, 2 sulfur cluster binding//ion binding//molecular_function//electron transfer activity//cation binding//iron-sulfur cluster binding//metal cluster binding//metal ion binding//binding	K02639 ferredoxin | (RefSeq) ferredoxin-like	http://www.genome.jp/dbget-bin/www_bget?sot:102598947	-	2Fe-2S ferredoxin, iron-sulphur binding site||Ferredoxin [2Fe-2S], plant||2Fe-2S ferredoxin-type iron-sulfur binding domain||Beta-grasp domain
260	PGSC0003DMG400011972	726.919	217.899	1.7381	7.6316e-08	3.7799e-06	UP	GO:0008150//GO:0008152	biological_process//metabolic process	--	--	GO:0016758//GO:0003824//GO:0016740//GO:0003674//GO:0016757	transferase activity, transferring hexosyl groups//catalytic activity//transferase activity//molecular_function//transferase activity, transferring glycosyl groups	no KO assigned | (RefSeq) anthocyanidin 3-O-glucosyltransferase 2-like	http://www.genome.jp/dbget-bin/www_bget?sot:102601849	-	UDP-glycosyltransferase family, conserved site||UDP-glucuronosyl/UDP-glucosyltransferase
261	PGSC0003DMG400011977	52.0839	7.53586	2.789	0.00069792	0.0087473	UP	--	--	--	--	--	--	K13993 HSP20 family protein | (RefSeq) small heat shock protein, chloroplastic-like	http://www.genome.jp/dbget-bin/www_bget?sot:102591853	-	Small heat shock protein HSP20||HSP20-like chaperone||Alpha crystallin/Hsp20 domain
262	PGSC0003DMG400012160	71.0054	17.9089	1.9873	0.0042366	0.035021	UP	GO:1903506//GO:0051252//GO:0008152//GO:2001141//GO:0044260//GO:1901576//GO:0034645//GO:0006351//GO:0097659//GO:0071704//GO:0006725//GO:0009889//GO:0044249//GO:0031323//GO:0050789//GO:0006355//GO:0008150//GO:0031326//GO:2000112//GO:0019438//GO:0009987//GO:0051171//GO:0080090//GO:1901362//GO:1901360//GO:0006139//GO:0044271//GO:0044237//GO:0019219//GO:0009059//GO:0043170//GO:0019222//GO:0034641//GO:…	regulation of nucleic acid-templated transcription//regulation of RNA metabolic process//metabolic process//regulation of RNA biosynthetic process//cellular macromolecule metabolic process//organic substance biosynthetic process//cellular macromolecule biosynthetic process//transcription, DNA-templated//nucleic acid-templated transcription//organic substance metabolic process//cellular aromatic c…	--	--	GO:0003674//GO:0003700//GO:0043565//GO:0003676//GO:1901363//GO:0097159//GO:0005488//GO:0003677	molecular_function//DNA-binding transcription factor activity//sequence-specific DNA binding//nucleic acid binding//heterocyclic compound binding//organic cyclic compound binding//binding//DNA binding	no KO assigned | (RefSeq) probable WRKY transcription factor 53	http://www.genome.jp/dbget-bin/www_bget?sot:102593434	-	WRKY domain
263	PGSC0003DMG400012201	1502.98	361.935	2.054	0.0051348	0.040293	UP	GO:0044085//GO:0043933//GO:0065003//GO:0016043//GO:0022607//GO:0071840//GO:0051260//GO:0051259//GO:0008150//GO:0009987//GO:0070271	cellular component biogenesis//protein-containing complex subunit organization//protein-containing complex assembly//cellular component organization//cellular component assembly//cellular component organization or biogenesis//protein homooligomerization//protein complex oligomerization//biological_process//cellular process//obsolete protein complex biogenesis	--	--	--	--	no KO assigned | (RefSeq) BTB/POZ domain-containing protein At5g41330	http://www.genome.jp/dbget-bin/www_bget?sot:102594299	-	Potassium channel tetramerisation-type BTB domain||BTB/POZ domain||WD40/YVTN repeat-like-containing domain||Quinoprotein amine dehydrogenase, beta chain-like||SKP1/BTB/POZ domain
264	PGSC0003DMG400012223	15.3316	0.334037	5.5204	0.006675	0.04901	UP	GO:0044237//GO:0006793//GO:0008152//GO:0006796//GO:0009987//GO:0008150	cellular metabolic process//phosphorus metabolic process//metabolic process//phosphate-containing compound metabolic process//cellular process//biological_process	GO:0044424//GO:0005622//GO:0044464//GO:0005623//GO:0005575//GO:0005737	intracellular part//intracellular//cell part//cell//cellular_component//cytoplasm	GO:0046872//GO:0004427//GO:0016817//GO:0005488//GO:0043169//GO:0016818//GO:0003674//GO:0043167//GO:0016787//GO:0000287//GO:0016462//GO:0003824	metal ion binding//inorganic diphosphatase activity//hydrolase activity, acting on acid anhydrides//binding//cation binding//hydrolase activity, acting on acid anhydrides, in phosphorus-containing anhydrides//molecular_function//ion binding//hydrolase activity//magnesium ion binding//pyrophosphatase activity//catalytic activity	K01507 inorganic pyrophosphatase [EC:3.6.1.1] | (RefSeq) soluble inorganic pyrophosphatase-like	http://www.genome.jp/dbget-bin/www_bget?sot:102581709	-	Inorganic pyrophosphatase
265	PGSC0003DMG400012396	1879.14	766.304	1.2941	3.9461e-06	0.00011721	UP	GO:0006725//GO:0006351//GO:0034645//GO:0071704//GO:0097659//GO:2001141//GO:1901576//GO:0044260//GO:0051252//GO:0008152//GO:1903506//GO:0080090//GO:1901362//GO:0051171//GO:0009987//GO:0019438//GO:0006355//GO:0031326//GO:0008150//GO:2000112//GO:0009889//GO:0031323//GO:0044249//GO:0050789//GO:0019222//GO:0043170//GO:0019219//GO:0009059//GO:0044237//GO:0006139//GO:1901360//GO:0044271//GO:0090304//GO:…	cellular aromatic compound metabolic process//transcription, DNA-templated//cellular macromolecule biosynthetic process//organic substance metabolic process//nucleic acid-templated transcription//regulation of RNA biosynthetic process//organic substance biosynthetic process//cellular macromolecule metabolic process//regulation of RNA metabolic process//metabolic process//regulation of nucleic aci…	GO:0043227//GO:0005575//GO:0043231//GO:0043226//GO:0043229//GO:0044424//GO:0044464//GO:0005622//GO:0005634//GO:0005623	membrane-bounded organelle//cellular_component//intracellular membrane-bounded organelle//organelle//intracellular organelle//intracellular part//cell part//intracellular//nucleus//cell	GO:0003674//GO:0097159//GO:0003676//GO:1901363//GO:0005488//GO:0003677	molecular_function//organic cyclic compound binding//nucleic acid binding//heterocyclic compound binding//binding//DNA binding	no KO assigned | (RefSeq) lanceolate; transcription factor TCP4-like	http://www.genome.jp/dbget-bin/www_bget?sot:102601150	-	Transcription factor, TCP||Transcription factor TCP subgroup
266	PGSC0003DMG400012418	359.351	159.545	1.1714	0.0052765	0.041158	UP	GO:0000041//GO:0008150//GO:0006810//GO:0051234//GO:0030001//GO:0006812//GO:0006811//GO:0051179//GO:0006825	transition metal ion transport//biological_process//transport//establishment of localization//metal ion transport//cation transport//ion transport//localization//copper ion transport	GO:0043231//GO:0005575//GO:0044429//GO:0005739//GO:0043227//GO:0005737//GO:0043226//GO:0005740//GO:0031975//GO:0031970//GO:0043229//GO:0044446//GO:0044422//GO:0005758//GO:0044424//GO:0031974//GO:0005622//GO:0044464//GO:0031967//GO:0005623//GO:0044444	intracellular membrane-bounded organelle//cellular_component//mitochondrial part//mitochondrion//membrane-bounded organelle//cytoplasm//organelle//mitochondrial envelope//envelope//organelle envelope lumen//intracellular organelle//intracellular organelle part//organelle part//mitochondrial intermembrane space//intracellular part//membrane-enclosed lumen//intracellular//cell part//organelle envel…	GO:0003674//GO:0005507//GO:0043167//GO:0016530//GO:0016531//GO:0046872//GO:0005488//GO:0046914//GO:0043169	molecular_function//copper ion binding//ion binding//metallochaperone activity//copper chaperone activity//metal ion binding//binding//transition metal ion binding//cation binding	no KO assigned | (RefSeq) uncharacterized LOC102588689	http://www.genome.jp/dbget-bin/www_bget?sot:102588689	-	Cytochrome c oxidase copper chaperone||Cysteine alpha-hairpin motif superfamily
267	PGSC0003DMG400012479	182.457	7.53812	4.5972	0.0061736	0.046258	UP	GO:0071705//GO:0006810//GO:0051234//GO:0008150//GO:0071702//GO:0006857//GO:0051179//GO:0015833//GO:0042886	nitrogen compound transport//transport//establishment of localization//biological_process//organic substance transport//oligopeptide transport//localization//peptide transport//amide transport	GO:0016020//GO:0005575//GO:0031224//GO:0016021//GO:0044425	membrane//cellular_component//intrinsic component of membrane//integral component of membrane//membrane part	GO:0003674//GO:0005215	molecular_function//transporter activity	K14638 solute carrier family 15 (peptide/histidine transporter), member 3/4 | (RefSeq) protein NRT1/ PTR FAMILY 6.3-like	http://www.genome.jp/dbget-bin/www_bget?sot:102603215	-	Major facilitator superfamily domain||PTR2 family proton/oligopeptide symporter, conserved site||Proton-dependent oligopeptide transporter family
268	PGSC0003DMG400012640	264.329	86.3037	1.6148	2.9912e-05	0.00067159	UP	GO:0045490//GO:0008152//GO:0043207//GO:0016052//GO:0005975//GO:0051707//GO:0071704//GO:0008150//GO:0000272//GO:0009624//GO:0009607//GO:0009056//GO:0010393//GO:0009057//GO:0009605//GO:0051704//GO:0043170//GO:0050896//GO:0045488//GO:1901575//GO:0044238//GO:0005976	pectin catabolic process//metabolic process//response to external biotic stimulus//carbohydrate catabolic process//carbohydrate metabolic process//response to other organism//organic substance metabolic process//biological_process//polysaccharide catabolic process//response to nematode//response to biotic stimulus//catabolic process//galacturonan metabolic process//macromolecule catabolic process…	--	--	GO:0016829//GO:0003674//GO:0043167//GO:0003824//GO:0005488//GO:0016837//GO:0046872//GO:0016835//GO:0030570//GO:0043169	lyase activity//molecular_function//ion binding//catalytic activity//binding//carbon-oxygen lyase activity, acting on polysaccharides//metal ion binding//carbon-oxygen lyase activity//pectate lyase activity//cation binding	K01728 pectate lyase [EC:4.2.2.2] | (RefSeq) probable pectate lyase P18	http://www.genome.jp/dbget-bin/www_bget?sot:102586644	-	AmbAllergen||Pectate lyase||Pectin lyase fold/virulence factor||Pectin lyase fold
269	PGSC0003DMG400012857	716.038	210.043	1.7694	2.6437e-06	8.289e-05	UP	GO:0008150//GO:0009987//GO:0007017//GO:0007049//GO:0016043//GO:0007010//GO:0006996//GO:0071840//GO:0022402//GO:0051301//GO:0000910//GO:0000226	biological_process//cellular process//microtubule-based process//cell cycle//cellular component organization//cytoskeleton organization//organelle organization//cellular component organization or biogenesis//cell cycle process//cell division//cytokinesis//microtubule cytoskeleton organization	--	--	GO:0008092//GO:0003674//GO:0015631//GO:0044877//GO:0005515//GO:0008017//GO:0005488	cytoskeletal protein binding//molecular_function//tubulin binding//protein-containing complex binding//protein binding//microtubule binding//binding	K16732 protein regulator of cytokinesis 1 | (RefSeq) 65-kDa microtubule-associated protein 1-like	http://www.genome.jp/dbget-bin/www_bget?sot:102590077	-	Microtubule-associated protein, MAP65/Ase1/PRC1
270	PGSC0003DMG400013001	54.621	1.24276	5.4578	0.0017554	0.018007	UP	--	--	GO:0005575//GO:0016020//GO:0044425//GO:0016021//GO:0031224	cellular_component//membrane//membrane part//integral component of membrane//intrinsic component of membrane	--	--	no KO assigned | (RefSeq) uncharacterized LOC102604684	http://www.genome.jp/dbget-bin/www_bget?sot:102604684	--	--
271	PGSC0003DMG400013109	225.528	79.2768	1.5083	0.00039852	0.00555	UP	GO:0000041//GO:0009987//GO:0098655//GO:0008150//GO:0006810//GO:0098662//GO:0051234//GO:0030001//GO:0098660//GO:0034220//GO:0071577//GO:0006829//GO:0051179//GO:0070838//GO:0072511//GO:0055085//GO:0006812//GO:0006811	transition metal ion transport//cellular process//cation transmembrane transport//biological_process//transport//inorganic cation transmembrane transport//establishment of localization//metal ion transport//inorganic ion transmembrane transport//ion transmembrane transport//zinc ion transmembrane transport//zinc ion transport//localization//divalent metal ion transport//divalent inorganic cation …	GO:0005575//GO:0016020//GO:0031224//GO:0016021//GO:0044425	cellular_component//membrane//intrinsic component of membrane//integral component of membrane//membrane part	GO:0072509//GO:0022857//GO:0046915//GO:0003674//GO:0005215//GO:0046873//GO:0005385//GO:0022890//GO:0008324//GO:0015075	divalent inorganic cation transmembrane transporter activity//transmembrane transporter activity//transition metal ion transmembrane transporter activity//molecular_function//transporter activity//metal ion transmembrane transporter activity//zinc ion transmembrane transporter activity//inorganic cation transmembrane transporter activity//cation transmembrane transporter activity//ion transmembra…	K14709 solute carrier family 39 (zinc transporter), member 1/2/3 | (RefSeq) zinc transporter 5-like	http://www.genome.jp/dbget-bin/www_bget?sot:102600170	-	Zinc/iron permease, fungal/plant||Zinc/iron permease
272	PGSC0003DMG400013227	2849.04	521.899	2.4486	3.9115e-14	7.5734e-12	UP	--	--	GO:0016020//GO:0005575//GO:0016021//GO:0044425//GO:0031224	membrane//cellular_component//integral component of membrane//membrane part//intrinsic component of membrane	--	--	no KO assigned | (RefSeq) osmotin-like protein OSML13	http://www.genome.jp/dbget-bin/www_bget?sot:102592911	-	Thaumatin||Thaumatin, conserved site
273	PGSC0003DMG400013405	532.205	176.985	1.5884	0.002827	0.025727	UP	--	--	--	--	GO:0097159//GO:0003676//GO:1901363//GO:0003674//GO:0003677//GO:0005488	organic cyclic compound binding//nucleic acid binding//heterocyclic compound binding//molecular_function//DNA binding//binding	K09422 myb proto-oncogene protein, plant | (RefSeq) myb-related protein Myb4-like	http://www.genome.jp/dbget-bin/www_bget?sot:102600950	MYB15	-||SANT/Myb domain||Homeobox domain-like||Myb domain
274	PGSC0003DMG400013449	38.5368	5.54244	2.7976	0.0028894	0.026171	UP	--	--	GO:0044435//GO:0044422//GO:0044446//GO:0043229//GO:0044424//GO:0044464//GO:0009941//GO:0005622//GO:0044444//GO:0005623//GO:0031967//GO:0044434//GO:0043227//GO:0009526//GO:0005575//GO:0043231//GO:0005737//GO:0009507//GO:0043226//GO:0031975//GO:0009536	plastid part//organelle part//intracellular organelle part//intracellular organelle//intracellular part//cell part//chloroplast envelope//intracellular//cytoplasmic part//cell//organelle envelope//chloroplast part//membrane-bounded organelle//plastid envelope//cellular_component//intracellular membrane-bounded organelle//cytoplasm//chloroplast//organelle//envelope//plastid	GO:0097367//GO:0046872//GO:1901265//GO:0017076//GO:0043168//GO:0005488//GO:0032549//GO:0016817//GO:0032559//GO:0043169//GO:0046914//GO:0000166//GO:0001883//GO:0001882//GO:0043167//GO:0003674//GO:0036094//GO:0016818//GO:0032553//GO:0005524//GO:0035639//GO:0032555//GO:0008270//GO:0032550//GO:0016787//GO:0097159//GO:0003676//GO:1901363//GO:0003824//GO:0030554	carbohydrate derivative binding//metal ion binding//nucleoside phosphate binding//purine nucleotide binding//anion binding//binding//ribonucleoside binding//hydrolase activity, acting on acid anhydrides//adenyl ribonucleotide binding//cation binding//transition metal ion binding//nucleotide binding//purine nucleoside binding//nucleoside binding//ion binding//molecular_function//small molecule bin…	K15505 DNA repair protein RAD5 [EC:3.6.4.-] | (RefSeq) putative SWI/SNF-related matrix-associated actin-dependent regulator of chromatin subfamily A member 3-like 3	http://www.genome.jp/dbget-bin/www_bget?sot:102588387	-	Helicase, C-terminal||Helicase superfamily 1/2, ATP-binding domain||Ubiquitin-associated domain||Zinc finger, RING-type, conserved site||Zinc finger, RING-type||Zinc finger, RING/FYVE/PHD-type||P-loop containing nucleoside triphosphate hydrolase||HIRAN domain||SNF2-related, N-terminal domain
275	PGSC0003DMG400013476	124.917	35.7241	1.806	0.00068039	0.0085745	UP	--	--	--	--	GO:0016763//GO:0016740//GO:0003824//GO:0016757//GO:0003674//GO:0003950	transferase activity, transferring pentosyl groups//transferase activity//catalytic activity//transferase activity, transferring glycosyl groups//molecular_function//NAD+ ADP-ribosyltransferase activity	no KO assigned | (RefSeq) probable inactive poly [ADP-ribose] polymerase SRO2	http://www.genome.jp/dbget-bin/www_bget?sot:102590341	-	Poly(ADP-ribose) polymerase, catalytic domain||RST domain of plant C-terminal
276	PGSC0003DMG400013485	1619.52	24.6004	6.0407	1.7842e-29	2.9556e-26	UP	--	--	--	--	GO:0005488//GO:0032559//GO:0032549//GO:0043168//GO:0017076//GO:0097367//GO:1901265//GO:0001882//GO:0000166//GO:0001883//GO:0035639//GO:0032555//GO:0032550//GO:0032553//GO:0005524//GO:0003674//GO:0036094//GO:0043167//GO:1901363//GO:0030554//GO:0003824//GO:0097159	binding//adenyl ribonucleotide binding//ribonucleoside binding//anion binding//purine nucleotide binding//carbohydrate derivative binding//nucleoside phosphate binding//nucleoside binding//nucleotide binding//purine nucleoside binding//purine ribonucleoside triphosphate binding//purine ribonucleotide binding//purine ribonucleoside binding//ribonucleotide binding//ATP binding//molecular_function//…	K01648 ATP citrate (pro-S)-lyase [EC:2.3.3.8] | (RefSeq) ATP-citrate synthase alpha chain protein 2-like	http://www.genome.jp/dbget-bin/www_bget?sot:102585745	-	ATP-grasp fold, subdomain 1||Succinyl-CoA synthetase-like||ATP-citrate synthase, citrate-binding domain||ATP-grasp fold, succinyl-CoA synthetase-type
277	PGSC0003DMG400013552	81.4988	1.43344	5.8292	5.0644e-07	1.9922e-05	UP	--	--	GO:0031224//GO:0016021//GO:0044425//GO:0005575//GO:0016020	intrinsic component of membrane//integral component of membrane//membrane part//cellular_component//membrane	--	--	no KO assigned | (RefSeq) uncharacterized LOC102589679	http://www.genome.jp/dbget-bin/www_bget?sot:102589679	--	--
278	PGSC0003DMG400013743	28.4621	2.43882	3.5448	0.0038256	0.032453	UP	GO:0051246//GO:0007051//GO:0001934//GO:0043412//GO:0051247//GO:0051493//GO:0008150//GO:0050789//GO:0031323//GO:0080090//GO:0010604//GO:0009987//GO:0032270//GO:0000278//GO:0044093//GO:0006796//GO:0007052//GO:0050790//GO:0008152//GO:0031325//GO:0045859//GO:0006793//GO:0045937//GO:0048522//GO:0007017//GO:1903047//GO:0042327//GO:0010564//GO:0071704//GO:0043085//GO:0031399//GO:0001932//GO:0044260//GO:…	regulation of protein metabolic process//spindle organization//positive regulation of protein phosphorylation//macromolecule modification//positive regulation of protein metabolic process//regulation of cytoskeleton organization//biological_process//regulation of biological process//regulation of cellular metabolic process//regulation of primary metabolic process//positive regulation of macromole…	GO:0044430//GO:0005856//GO:0043226//GO:0015630//GO:0032991//GO:0005575//GO:0005623//GO:0005819//GO:0043228//GO:0044464//GO:0005622//GO:0005874//GO:0044424//GO:0043232//GO:0044422//GO:0044446//GO:0043229	cytoskeletal part//cytoskeleton//organelle//microtubule cytoskeleton//protein-containing complex//cellular_component//cell//spindle//non-membrane-bounded organelle//cell part//intracellular//microtubule//intracellular part//intracellular non-membrane-bounded organelle//organelle part//intracellular organelle part//intracellular organelle	--	--	K16812 targeting protein for Xklp2 | (RefSeq) protein TPX2-like	http://www.genome.jp/dbget-bin/www_bget?sot:102582210	-	TPX2 central domain||TPX2, C-terminal||TPX2
279	PGSC0003DMG400013855	290.537	119.233	1.2849	0.00092106	0.010955	UP	GO:0008150//GO:0055114//GO:0008152	biological_process//oxidation-reduction process//metabolic process	GO:0005575//GO:0016020//GO:0031224//GO:0044425//GO:0016021	cellular_component//membrane//intrinsic component of membrane//membrane part//integral component of membrane	GO:0016491//GO:0003824//GO:0003674//GO:0005507//GO:0043167//GO:0046914//GO:0043169//GO:0005488//GO:0046872	oxidoreductase activity//catalytic activity//molecular_function//copper ion binding//ion binding//transition metal ion binding//cation binding//binding//metal ion binding	no KO assigned | (RefSeq) monocopper oxidase-like protein SKS1	http://www.genome.jp/dbget-bin/www_bget?sot:102601589	-	Multicopper oxidase, type 2||Multicopper oxidase, type 3||Multicopper oxidase, type 1||Cupredoxin
280	PGSC0003DMG400013879	16526.1	4381.83	1.9151	7.8034e-13	1.2056e-10	UP	GO:0055114//GO:0008150//GO:0008152	oxidation-reduction process//biological_process//metabolic process	--	--	GO:0097159//GO:0050662//GO:0016491//GO:0003824//GO:1901363//GO:0016651//GO:0036094//GO:0003674//GO:0010181//GO:0043167//GO:0003955//GO:0032553//GO:0000166//GO:0048037//GO:1901265//GO:0097367//GO:0016655//GO:0005488//GO:0043168	organic cyclic compound binding//coenzyme binding//oxidoreductase activity//catalytic activity//heterocyclic compound binding//oxidoreductase activity, acting on NAD(P)H//small molecule binding//molecular_function//FMN binding//ion binding//NAD(P)H dehydrogenase (quinone) activity//ribonucleotide binding//nucleotide binding//cofactor binding//nucleoside phosphate binding//carbohydrate derivative …	K03809 NAD(P)H dehydrogenase (quinone) [EC:1.6.5.2] | (RefSeq) probable NAD(P)H dehydrogenase (quinone) FQR1-like 1	http://www.genome.jp/dbget-bin/www_bget?sot:102585783	-	Flavodoxin/nitric oxide synthase||NADPH-dependent FMN reductase-like||Flavoprotein-like domain||Flavoprotein WrbA-like
281	PGSC0003DMG400014007	2551.66	1151	1.1486	0.0023642	0.022551	UP	GO:0008150//GO:0050789//GO:0045454//GO:0009987//GO:0019725//GO:0042592//GO:0065008//GO:0065007//GO:0050794	biological_process//regulation of biological process//cell redox homeostasis//cellular process//cellular homeostasis//homeostatic process//regulation of biological quality//biological regulation//regulation of cellular process	GO:0005783//GO:0043226//GO:0005737//GO:0005575//GO:0043231//GO:0043227//GO:0005623//GO:0044444//GO:0005622//GO:0012505//GO:0044464//GO:0044424//GO:0043229	endoplasmic reticulum//organelle//cytoplasm//cellular_component//intracellular membrane-bounded organelle//membrane-bounded organelle//cell//cytoplasmic part//intracellular//endomembrane system//cell part//intracellular part//intracellular organelle	GO:0003824//GO:0016853//GO:0003674	catalytic activity//isomerase activity//molecular_function	K09580 protein disulfide-isomerase A1 [EC:5.3.4.1] | (RefSeq) protein disulfide-isomerase-like	http://www.genome.jp/dbget-bin/www_bget?sot:102598658	-	Protein disulphide isomerase||Thioredoxin, conserved site||Thioredoxin domain||Thioredoxin-like fold
282	PGSC0003DMG400014010	348.401	62.9837	2.4677	1.8605e-10	1.7837e-08	UP	GO:0008152//GO:0055114//GO:0008150	metabolic process//oxidation-reduction process//biological_process	--	--	GO:0046872//GO:0005488//GO:0004497//GO:0043169//GO:0046914//GO:0020037//GO:0016705//GO:0043167//GO:0003674//GO:0046906//GO:0005506//GO:0097159//GO:1901363//GO:0003824//GO:0016491	metal ion binding//binding//monooxygenase activity//cation binding//transition metal ion binding//heme binding//oxidoreductase activity, acting on paired donors, with incorporation or reduction of molecular oxygen//ion binding//molecular_function//tetrapyrrole binding//iron ion binding//organic cyclic compound binding//heterocyclic compound binding//catalytic activity//oxidoreductase activity	K20562 biphenyl-4-hydroxylase | (RefSeq) cytochrome P450 CYP736A12-like	http://www.genome.jp/dbget-bin/www_bget?sot:102599044	-	Cytochrome P450, E-class, group I||Cytochrome P450||Cytochrome P450, conserved site
283	PGSC0003DMG400014020	96.4414	32.9316	1.5502	0.0045182	0.036769	UP	--	--	--	--	GO:0005488//GO:0003674//GO:0008289	binding//molecular_function//lipid binding	no KO assigned | (RefSeq) homeobox-leucine zipper protein HDG8-like	http://www.genome.jp/dbget-bin/www_bget?sot:102605853	-	START-like domain||START domain
284	PGSC0003DMG400014062	137.018	12.0883	3.5027	1.0137e-06	3.6026e-05	UP	--	--	--	--	GO:0016746//GO:0003674//GO:0003824//GO:0016747//GO:0016740	transferase activity, transferring acyl groups//molecular_function//catalytic activity//transferase activity, transferring acyl groups other than amino-acyl groups//transferase activity	no KO assigned | (RefSeq) acylsugar acyltransferase 3-like	http://www.genome.jp/dbget-bin/www_bget?sot:102585228	-	Transferase
285	PGSC0003DMG400014095	23506.6	10914.5	1.1068	1.3379e-05	0.00033836	UP	GO:0008152//GO:0055114//GO:0008150	metabolic process//oxidation-reduction process//biological_process	--	--	GO:0003674//GO:0016491//GO:0003824	molecular_function//oxidoreductase activity//catalytic activity	no KO assigned | (RefSeq) 3-oxoacyl-[acyl-carrier-protein] reductase FabG-like	http://www.genome.jp/dbget-bin/www_bget?sot:102597729	-	Short-chain dehydrogenase/reductase SDR||NAD(P)-binding domain||Short-chain dehydrogenase/reductase, conserved site
286	PGSC0003DMG400014232	23492.3	10406.4	1.1747	0.0062171	0.046412	UP	GO:0043170//GO:0044237//GO:0044238//GO:0019538//GO:0044267//GO:0071704//GO:0044260//GO:0008152//GO:0009987//GO:0006457//GO:0008150	macromolecule metabolic process//cellular metabolic process//primary metabolic process//protein metabolic process//cellular protein metabolic process//organic substance metabolic process//cellular macromolecule metabolic process//metabolic process//cellular process//protein folding//biological_process	GO:0043229//GO:0016021//GO:0044425//GO:0044424//GO:0012505//GO:0031224//GO:0044464//GO:0005622//GO:0005623//GO:0044444//GO:0043227//GO:0016020//GO:0043231//GO:0005575//GO:0005737//GO:0043226//GO:0005783	intracellular organelle//integral component of membrane//membrane part//intracellular part//endomembrane system//intrinsic component of membrane//cell part//intracellular//cell//cytoplasmic part//membrane-bounded organelle//membrane//intracellular membrane-bounded organelle//cellular_component//cytoplasm//organelle//endoplasmic reticulum	GO:0046872//GO:0005488//GO:0043169//GO:0005515//GO:0043167//GO:0003674//GO:0051082//GO:0005509	metal ion binding//binding//cation binding//protein binding//ion binding//molecular_function//unfolded protein binding//calcium ion binding	K08054 calnexin | (RefSeq) calnexin homolog 1	http://www.genome.jp/dbget-bin/www_bget?sot:102601553	-	Calreticulin/calnexin||Calreticulin/calnexin, conserved site||Calreticulin/calnexin, P domain||Concanavalin A-like lectin/glucanase domain
287	PGSC0003DMG400014272	1989.33	902.927	1.1396	3.8564e-05	0.00083142	UP	GO:0008152//GO:0008150//GO:0055114	metabolic process//biological_process//oxidation-reduction process	--	--	GO:0005488//GO:0004497//GO:0046872//GO:0016705//GO:0020037//GO:0046914//GO:0043169//GO:0005506//GO:0046906//GO:0003674//GO:0043167//GO:0016491//GO:1901363//GO:0003824//GO:0097159	binding//monooxygenase activity//metal ion binding//oxidoreductase activity, acting on paired donors, with incorporation or reduction of molecular oxygen//heme binding//transition metal ion binding//cation binding//iron ion binding//tetrapyrrole binding//molecular_function//ion binding//oxidoreductase activity//heterocyclic compound binding//catalytic activity//organic cyclic compound binding	no KO assigned | (RefSeq) probable (S)-N-methylcoclaurine 3'-hydroxylase isozyme 2	http://www.genome.jp/dbget-bin/www_bget?sot:102582095	-	Cytochrome P450, conserved site||Cytochrome P450||Cytochrome P450, E-class, group I
288	PGSC0003DMG400014293	168.01	54.1647	1.6331	0.00065297	0.0083345	UP	--	--	--	--	--	--	no KO assigned | (RefSeq) low-temperature-induced 65 kDa protein-like	http://www.genome.jp/dbget-bin/www_bget?sot:102596667	-	CAP160
289	PGSC0003DMG400014345	601.971	240.276	1.325	0.0054261	0.042068	UP	GO:0008150//GO:0008152	biological_process//metabolic process	--	--	GO:0003824//GO:0003674	catalytic activity//molecular_function	no KO assigned | (RefSeq) oxalate--CoA ligase-like	http://www.genome.jp/dbget-bin/www_bget?sot:102593155	-	AMP-dependent synthetase/ligase||AMP-binding enzyme, C-terminal domain||AMP-binding, conserved site
290	PGSC0003DMG400014405	3298.7	1238.34	1.4135	1.8895e-06	6.1238e-05	UP	GO:0008150//GO:0009987//GO:0006457//GO:0008152//GO:0071704//GO:0044260//GO:0044267//GO:0050896//GO:0044238//GO:0019538//GO:0006950//GO:0044237//GO:0043170	biological_process//cellular process//protein folding//metabolic process//organic substance metabolic process//cellular macromolecule metabolic process//cellular protein metabolic process//response to stimulus//primary metabolic process//protein metabolic process//response to stress//cellular metabolic process//macromolecule metabolic process	--	--	GO:0030554//GO:1901363//GO:0097159//GO:0032553//GO:0005524//GO:0051082//GO:0032550//GO:0035639//GO:0032555//GO:0043167//GO:0003674//GO:0036094//GO:0001883//GO:0000166//GO:0001882//GO:0005515//GO:0043168//GO:0032549//GO:0032559//GO:0005488//GO:1901265//GO:0097367//GO:0017076	adenyl nucleotide binding//heterocyclic compound binding//organic cyclic compound binding//ribonucleotide binding//ATP binding//unfolded protein binding//purine ribonucleoside binding//purine ribonucleoside triphosphate binding//purine ribonucleotide binding//ion binding//molecular_function//small molecule binding//purine nucleoside binding//nucleotide binding//nucleoside binding//protein binding…	K04079 molecular chaperone HtpG | (RefSeq) heat shock cognate protein 80	http://www.genome.jp/dbget-bin/www_bget?sot:102604977	-	Heat shock protein Hsp90 family||Heat shock protein Hsp90, N-terminal||Histidine kinase-like ATPase, C-terminal domain||Ribosomal protein S5 domain 2-type fold||Heat shock protein Hsp90, conserved site
291	PGSC0003DMG400014474	250.437	82.4862	1.6022	0.0024059	0.022845	UP	GO:0051179//GO:0008150//GO:0051234//GO:0006810	localization//biological_process//establishment of localization//transport	GO:0031224//GO:0016021//GO:0044425//GO:0005575//GO:0016020	intrinsic component of membrane//integral component of membrane//membrane part//cellular_component//membrane	GO:0005215//GO:0003674	transporter activity//molecular_function	K14638 solute carrier family 15 (peptide/histidine transporter), member 3/4 | (RefSeq) protein NRT1/ PTR FAMILY 8.3-like	http://www.genome.jp/dbget-bin/www_bget?sot:102605172	-	Major facilitator superfamily domain||Proton-dependent oligopeptide transporter family
292	PGSC0003DMG400014589	221.163	84.9157	1.381	0.00085483	0.010353	UP	GO:0008150//GO:0050896//GO:0006950	biological_process//response to stimulus//response to stress	--	--	GO:0005516//GO:0003674//GO:0005515//GO:0005488	calmodulin binding//molecular_function//protein binding//binding	no KO assigned | (RefSeq) calmodulin-binding protein 60 A-like	http://www.genome.jp/dbget-bin/www_bget?sot:102581617	-	CALMODULIN-BINDING PROTEIN60||Transcription factor GRAS
293	PGSC0003DMG400014597	141.38	21.2476	2.7342	2.9027e-06	8.9828e-05	UP	GO:0051641//GO:0051649//GO:0006839//GO:0051234//GO:0006810//GO:0008150//GO:0046907//GO:0051179	cellular localization//establishment of localization in cell//mitochondrial transport//establishment of localization//transport//biological_process//intracellular transport//localization	GO:0005737//GO:0016020//GO:0043227//GO:0044429//GO:0005739//GO:0043231//GO:0005575//GO:0031975//GO:0005740//GO:0043226//GO:0044425//GO:0044424//GO:0031966//GO:0031090//GO:0043229//GO:0044446//GO:0044422//GO:0016021//GO:0044444//GO:0005623//GO:0031967//GO:0031224//GO:0044464//GO:0005622	cytoplasm//membrane//membrane-bounded organelle//mitochondrial part//mitochondrion//intracellular membrane-bounded organelle//cellular_component//envelope//mitochondrial envelope//organelle//membrane part//intracellular part//mitochondrial membrane//organelle membrane//intracellular organelle//intracellular organelle part//organelle part//integral component of membrane//cytoplasmic part//cell//or…	--	--	K15104 solute carrier family 25 (mitochondrial oxoglutarate transporter), member 11 | (RefSeq) mitochondrial uncoupling protein 5-like	http://www.genome.jp/dbget-bin/www_bget?sot:102599542	-	Mitochondrial carrier domain||Mitochondrial substrate/solute carrier||Mitochondrial carrier UCP-like
294	PGSC0003DMG400014627	14474.9	4189.4	1.7887	0.0026289	0.024404	UP	--	--	--	--	GO:0016740//GO:0003824//GO:0003674	transferase activity//catalytic activity//molecular_function	K00799 glutathione S-transferase [EC:2.5.1.18] | (RefSeq) glutathione S-transferase	http://www.genome.jp/dbget-bin/www_bget?sot:102583107	-	Glutathione S-transferases Phi, C-terminal||Glutathione S-transferase, C-terminal||Thioredoxin-like fold||Glutathione S-transferase, N-terminal||Glutathione S-transferase, C-terminal-like
295	PGSC0003DMG400014639	77.5863	0.574682	7.0769	1.3436e-05	0.0003395	UP	--	--	--	--	--	--	no KO assigned | (RefSeq) uncharacterized LOC102580649	http://www.genome.jp/dbget-bin/www_bget?sot:102580649	--	--
296	PGSC0003DMG400014657	2437.44	741.491	1.7169	5.6977e-06	0.0001618	UP	--	--	--	--	--	--	K00799 glutathione S-transferase [EC:2.5.1.18] | (RefSeq) probable glutathione S-transferase	http://www.genome.jp/dbget-bin/www_bget?sot:102602353	-	Glutathione S-transferase, C-terminal-like||Glutathione S-transferase, N-terminal||Thioredoxin-like fold
297	PGSC0003DMG400014739	226.953	83.1136	1.4492	0.0015755	0.016559	UP	--	--	GO:0031224//GO:0016021//GO:0044425//GO:0005575//GO:0016020	intrinsic component of membrane//integral component of membrane//membrane part//cellular_component//membrane	--	--	no KO assigned | (RefSeq) LRR receptor-like serine/threonine-protein kinase FLS2	http://www.genome.jp/dbget-bin/www_bget?sot:102593754	-	Leucine-rich repeat||Leucine-rich repeat-containing N-terminal, plant-type||Leucine-rich repeat domain, L domain-like||Leucine-rich repeat, typical subtype
298	PGSC0003DMG400014740	147.375	31.605	2.2213	0.0010968	0.012492	UP	--	--	GO:0031224//GO:0016021//GO:0044425//GO:0016020//GO:0005575	intrinsic component of membrane//integral component of membrane//membrane part//membrane//cellular_component	--	--	no KO assigned | (RefSeq) probable leucine-rich repeat receptor-like protein kinase At2g33170	http://www.genome.jp/dbget-bin/www_bget?sot:102597701	-	Leucine-rich repeat domain, L domain-like||Leucine-rich repeat, typical subtype||Leucine-rich repeat||Leucine-rich repeat-containing N-terminal, plant-type
299	PGSC0003DMG400014753	304.128	94.6354	1.6842	2.9779e-05	0.00066912	UP	--	--	GO:0031224//GO:0044425//GO:0016021//GO:0016020//GO:0005575	intrinsic component of membrane//membrane part//integral component of membrane//membrane//cellular_component	--	--	--	--	-	Leucine-rich repeat||Leucine-rich repeat-containing N-terminal, plant-type||Leucine-rich repeat domain, L domain-like
300	PGSC0003DMG400014791	1391.49	426.783	1.7051	4.3279e-05	0.00091456	UP	--	--	GO:0043227//GO:0043231//GO:0005575//GO:0043226//GO:0044424//GO:0043229//GO:0005623//GO:0044464//GO:0005634//GO:0005622	membrane-bounded organelle//intracellular membrane-bounded organelle//cellular_component//organelle//intracellular part//intracellular organelle//cell//cell part//nucleus//intracellular	--	--	no KO assigned | (RefSeq) lysine-specific demethylase JMJ706	http://www.genome.jp/dbget-bin/www_bget?sot:102585838	-	JmjC domain||Zinc finger, C5HC2-type||JmjN domain
301	PGSC0003DMG400014880	1501.57	5.86931	7.9991	0.00060035	0.0077794	UP	--	--	--	--	--	--	--	--	--	--
302	PGSC0003DMG400014917	611.542	305.046	1.0034	0.0037381	0.031891	UP	GO:0006796//GO:0009987//GO:0008150//GO:0043412//GO:0044260//GO:0071704//GO:0006793//GO:0008152//GO:0019538//GO:0006468//GO:0044238//GO:0036211//GO:0044267//GO:0006464//GO:0043170//GO:0016310//GO:0044237	phosphate-containing compound metabolic process//cellular process//biological_process//macromolecule modification//cellular macromolecule metabolic process//organic substance metabolic process//phosphorus metabolic process//metabolic process//protein metabolic process//protein phosphorylation//primary metabolic process//protein modification process//cellular protein metabolic process//cellular pr…	GO:0005575//GO:0016020//GO:0031224//GO:0016021//GO:0044425	cellular_component//membrane//intrinsic component of membrane//integral component of membrane//membrane part	GO:0097159//GO:0016740//GO:1901363//GO:0030554//GO:0003824//GO:0003674//GO:0036094//GO:0043167//GO:0035639//GO:0032555//GO:0032550//GO:0016301//GO:0032553//GO:0005524//GO:0016773//GO:0004672//GO:0001882//GO:0016772//GO:0000166//GO:0001883//GO:0017076//GO:0097367//GO:1901265//GO:0005488//GO:0032559//GO:0032549//GO:0043168	organic cyclic compound binding//transferase activity//heterocyclic compound binding//adenyl nucleotide binding//catalytic activity//molecular_function//small molecule binding//ion binding//purine ribonucleoside triphosphate binding//purine ribonucleotide binding//purine ribonucleoside binding//kinase activity//ribonucleotide binding//ATP binding//phosphotransferase activity, alcohol group as acc…	no KO assigned | (RefSeq) probable inactive leucine-rich repeat receptor-like protein kinase At1g66830	http://www.genome.jp/dbget-bin/www_bget?sot:102579589	-	Leucine-rich repeat domain, L domain-like||Serine/threonine-protein kinase, active site||Leucine-rich repeat-containing N-terminal, plant-type||Protein kinase domain||Leucine-rich repeat||Protein kinase-like domain
303	PGSC0003DMG400015129	97.9202	4.92433	4.3136	9.7296e-06	0.00025742	UP	GO:0006950//GO:0050896//GO:0006952//GO:0008150	response to stress//response to stimulus//defense response//biological_process	--	--	--	--	--	--	-	Knottin, scorpion toxin-like||Defensin, plant
304	PGSC0003DMG400015162	1673.94	801.091	1.0632	0.00011688	0.0020735	UP	GO:0019538//GO:0036211//GO:0006468//GO:0044238//GO:0044267//GO:0006464//GO:0043170//GO:0016310//GO:0044237//GO:0006796//GO:0009987//GO:0008150//GO:0043412//GO:0044260//GO:0071704//GO:0006793//GO:0008152	protein metabolic process//protein modification process//protein phosphorylation//primary metabolic process//cellular protein metabolic process//cellular protein modification process//macromolecule metabolic process//phosphorylation//cellular metabolic process//phosphate-containing compound metabolic process//cellular process//biological_process//macromolecule modification//cellular macromolecule…	GO:0044464//GO:0031224//GO:0005623//GO:0016021//GO:0044425//GO:0005575//GO:0005886//GO:0016020//GO:0071944	cell part//intrinsic component of membrane//cell//integral component of membrane//membrane part//cellular_component//plasma membrane//membrane//cell periphery	GO:0016773//GO:0004672//GO:0016772//GO:0001882//GO:0000166//GO:0001883//GO:0017076//GO:0097367//GO:1901265//GO:0005488//GO:0032559//GO:0032549//GO:0043168//GO:0097159//GO:0016740//GO:1901363//GO:0030554//GO:0003824//GO:0036094//GO:0003674//GO:0043167//GO:0032555//GO:0035639//GO:0032550//GO:0016301//GO:0005524//GO:0032553	phosphotransferase activity, alcohol group as acceptor//protein kinase activity//transferase activity, transferring phosphorus-containing groups//nucleoside binding//nucleotide binding//purine nucleoside binding//purine nucleotide binding//carbohydrate derivative binding//nucleoside phosphate binding//binding//adenyl ribonucleotide binding//ribonucleoside binding//anion binding//organic cyclic co…	no KO assigned | (RefSeq) probable inactive receptor kinase At2g26730	http://www.genome.jp/dbget-bin/www_bget?sot:102602951	-	Protein kinase-like domain||Leucine-rich repeat-containing N-terminal, plant-type||Protein kinase domain||Leucine-rich repeat||Leucine-rich repeat domain, L domain-like
305	PGSC0003DMG400015319	2647.15	1215.84	1.1225	3.9715e-05	0.00084888	UP	GO:0008150//GO:0043412//GO:0006796//GO:0009987//GO:0006793//GO:0008152//GO:0044260//GO:0071704//GO:0044267//GO:0019538//GO:0044238//GO:0006468//GO:0036211//GO:0044237//GO:0006464//GO:0016310//GO:0043170	biological_process//macromolecule modification//phosphate-containing compound metabolic process//cellular process//phosphorus metabolic process//metabolic process//cellular macromolecule metabolic process//organic substance metabolic process//cellular protein metabolic process//protein metabolic process//primary metabolic process//protein phosphorylation//protein modification process//cellular me…	--	--	GO:0016740//GO:0003824//GO:0030554//GO:1901363//GO:0097159//GO:0032550//GO:0035639//GO:0032555//GO:0032553//GO:0005524//GO:0016301//GO:0003674//GO:0036094//GO:0043167//GO:0001882//GO:0016772//GO:0004672//GO:0001883//GO:0000166//GO:0016773//GO:0032549//GO:0032559//GO:0005488//GO:0043168//GO:0017076//GO:1901265//GO:0097367	transferase activity//catalytic activity//adenyl nucleotide binding//heterocyclic compound binding//organic cyclic compound binding//purine ribonucleoside binding//purine ribonucleoside triphosphate binding//purine ribonucleotide binding//ribonucleotide binding//ATP binding//kinase activity//molecular_function//small molecule binding//ion binding//nucleoside binding//transferase activity, transfe…	no KO assigned | (RefSeq) protein SPA1-RELATED 4-like	http://www.genome.jp/dbget-bin/www_bget?sot:102587101	-	G-protein beta WD-40 repeat||WD40/YVTN repeat-like-containing domain||WD40 repeat, conserved site||Protein kinase-like domain||WD40-repeat-containing domain||WD40 repeat||Protein kinase domain
306	PGSC0003DMG400015352	390.694	158.863	1.2983	0.0024065	0.022845	UP	GO:0055114//GO:0008150//GO:0008152	oxidation-reduction process//biological_process//metabolic process	GO:0031224//GO:0016021//GO:0044425//GO:0016020//GO:0005575	intrinsic component of membrane//integral component of membrane//membrane part//membrane//cellular_component	GO:0003824//GO:0016491//GO:0003674	catalytic activity//oxidoreductase activity//molecular_function	no KO assigned | (RefSeq) receptor-like protein 12	http://www.genome.jp/dbget-bin/www_bget?sot:102591951	-	FAD/NAD(P)-binding domain||Leucine-rich repeat||Leucine-rich repeat domain, L domain-like
307	PGSC0003DMG400015355	398.442	172.937	1.2041	0.00076076	0.0094201	UP	GO:0055114//GO:0008150//GO:0008152	oxidation-reduction process//biological_process//metabolic process	--	--	GO:0003824//GO:0016491//GO:0003674	catalytic activity//oxidoreductase activity//molecular_function	no KO assigned | (RefSeq) FAD-dependent urate hydroxylase-like	http://www.genome.jp/dbget-bin/www_bget?sot:102589596	-	FAD/NAD(P)-binding domain
308	PGSC0003DMG400015530	1092.06	534.267	1.0314	0.00037097	0.0052597	UP	--	--	--	--	GO:0016462//GO:0097159//GO:1901363//GO:0003824//GO:0019001//GO:0043167//GO:0003674//GO:0036094//GO:0016818//GO:0032553//GO:0035639//GO:0032555//GO:0032550//GO:0016787//GO:0032561//GO:0017111//GO:0000166//GO:0005525//GO:0001883//GO:0001882//GO:0097367//GO:1901265//GO:0017076//GO:0003924//GO:0043168//GO:0005488//GO:0032549//GO:0016817	pyrophosphatase activity//organic cyclic compound binding//heterocyclic compound binding//catalytic activity//guanyl nucleotide binding//ion binding//molecular_function//small molecule binding//hydrolase activity, acting on acid anhydrides, in phosphorus-containing anhydrides//ribonucleotide binding//purine ribonucleoside triphosphate binding//purine ribonucleotide binding//purine ribonucleoside …	K07901 Ras-related protein Rab-8A | (RefSeq) ras-related protein RABE1c	http://www.genome.jp/dbget-bin/www_bget?sot:102582485	-	P-loop containing nucleoside triphosphate hydrolase||Small GTPase superfamily||Small GTP-binding protein domain
309	PGSC0003DMG400015548	32.9723	0	Inf	1.6276e-06	5.3566e-05	UP	GO:0042743//GO:0050896//GO:0072593//GO:0044237//GO:0006950//GO:0009987//GO:0044248//GO:0055114//GO:0009056//GO:0006979//GO:0008150//GO:0042744//GO:0008152	hydrogen peroxide metabolic process//response to stimulus//reactive oxygen species metabolic process//cellular metabolic process//response to stress//cellular process//cellular catabolic process//oxidation-reduction process//catabolic process//response to oxidative stress//biological_process//hydrogen peroxide catabolic process//metabolic process	GO:0005576//GO:0005575	extracellular region//cellular_component	GO:0043169//GO:0016209//GO:0020037//GO:0046872//GO:0005488//GO:0097159//GO:1901363//GO:0016684//GO:0003824//GO:0016491//GO:0043167//GO:0003674//GO:0004601//GO:0046906	cation binding//antioxidant activity//heme binding//metal ion binding//binding//organic cyclic compound binding//heterocyclic compound binding//oxidoreductase activity, acting on peroxide as acceptor//catalytic activity//oxidoreductase activity//ion binding//molecular_function//peroxidase activity//tetrapyrrole binding	K00430 peroxidase [EC:1.11.1.7] | (RefSeq) peroxidase 15-like	http://www.genome.jp/dbget-bin/www_bget?sot:102578391	-	Peroxidase, active site||Haem peroxidase||Plant peroxidase||Peroxidases heam-ligand binding site||Secretory peroxidase||Haem peroxidase, plant/fungal/bacterial
310	PGSC0003DMG400015573	240.525	7.17862	5.0663	0.0062041	0.046386	UP	GO:0055085//GO:0051179//GO:0008150//GO:0051234//GO:0006810//GO:0009987	transmembrane transport//localization//biological_process//establishment of localization//transport//cellular process	GO:0044425//GO:0016021//GO:0031224//GO:0005575//GO:0016020	membrane part//integral component of membrane//intrinsic component of membrane//cellular_component//membrane	GO:0005215//GO:0003674	transporter activity//molecular_function	no KO assigned | (RefSeq) nucleobase-ascorbate transporter 7	http://www.genome.jp/dbget-bin/www_bget?sot:102578566	-	Xanthine/uracil/vitamin C permease
311	PGSC0003DMG400015591	371.077	21.2485	4.1263	4.4669e-05	0.0009373	UP	GO:0071705//GO:0051234//GO:0006810//GO:0008150//GO:0006857//GO:0071702//GO:0051179//GO:0015833//GO:0042886	nitrogen compound transport//establishment of localization//transport//biological_process//oligopeptide transport//organic substance transport//localization//peptide transport//amide transport	GO:0016020//GO:0005575//GO:0031224//GO:0016021//GO:0044425	membrane//cellular_component//intrinsic component of membrane//integral component of membrane//membrane part	GO:0003674//GO:0005215	molecular_function//transporter activity	K14638 solute carrier family 15 (peptide/histidine transporter), member 3/4 | (RefSeq) protein NRT1/ PTR FAMILY 1.2-like	http://www.genome.jp/dbget-bin/www_bget?sot:102580650	-	PTR2 family proton/oligopeptide symporter, conserved site||Major facilitator superfamily domain||Proton-dependent oligopeptide transporter family
312	PGSC0003DMG400015692	4049.37	1948.22	1.0555	0.0025375	0.023788	UP	GO:0010468//GO:0032774//GO:0065007//GO:0016070//GO:0034641//GO:0010556//GO:0060255//GO:0034654//GO:0050794//GO:0018130//GO:0006807//GO:0009058//GO:0010467//GO:0090304//GO:0046483//GO:0044238//GO:0006139//GO:1901360//GO:0044271//GO:0044237//GO:0019219//GO:0009059//GO:0019222//GO:0043170//GO:0031326//GO:0008150//GO:0006355//GO:2000112//GO:0009889//GO:0050789//GO:0031323//GO:0044249//GO:0019438//GO:…	regulation of gene expression//RNA biosynthetic process//biological regulation//RNA metabolic process//cellular nitrogen compound metabolic process//regulation of macromolecule biosynthetic process//regulation of macromolecule metabolic process//nucleobase-containing compound biosynthetic process//regulation of cellular process//heterocycle biosynthetic process//nitrogen compound metabolic proces…	GO:0005623//GO:0005622//GO:0005634//GO:0044464//GO:0044424//GO:0043229//GO:0043226//GO:0005575//GO:0043231//GO:0043227	cell//intracellular//nucleus//cell part//intracellular part//intracellular organelle//organelle//cellular_component//intracellular membrane-bounded organelle//membrane-bounded organelle	GO:0000989//GO:0000988//GO:0003674	transcription factor activity, transcription factor binding//transcription factor activity, protein binding//molecular_function	K14494 DELLA protein | (RefSeq) GAI; DELLA protein GAI	http://www.genome.jp/dbget-bin/www_bget?sot:102587893	-	Transcriptional factor DELLA||Transcription factor GRAS||Transcriptional factor DELLA, N-terminal
313	PGSC0003DMG400015745	3811.26	1403.41	1.4413	6.4284e-08	3.2378e-06	UP	GO:0008150//GO:1901564//GO:0006544//GO:0044249//GO:1901566//GO:0044283//GO:0008652//GO:0006082//GO:0044281//GO:0009987//GO:0006545//GO:0008152//GO:0035999//GO:0006575//GO:0006520//GO:0006730//GO:1901576//GO:0006725//GO:1901605//GO:0071704//GO:0009069//GO:0006760//GO:0034641//GO:0006732//GO:1901607//GO:0019752//GO:0006807//GO:0009058//GO:0043603//GO:0051186//GO:0046483//GO:0044238//GO:0043436//GO:…	biological_process//organonitrogen compound metabolic process//glycine metabolic process//cellular biosynthetic process//organonitrogen compound biosynthetic process//small molecule biosynthetic process//cellular amino acid biosynthetic process//organic acid metabolic process//small molecule metabolic process//cellular process//glycine biosynthetic process//metabolic process//tetrahydrofolate int…	--	--	GO:0016740//GO:0003824//GO:1901363//GO:0016742//GO:0097159//GO:0016741//GO:0003674//GO:0043167//GO:0030170//GO:0005488//GO:0043168//GO:0048037//GO:0004372	transferase activity//catalytic activity//heterocyclic compound binding//hydroxymethyl-, formyl- and related transferase activity//organic cyclic compound binding//transferase activity, transferring one-carbon groups//molecular_function//ion binding//pyridoxal phosphate binding//binding//anion binding//cofactor binding//glycine hydroxymethyltransferase activity	K00600 glycine hydroxymethyltransferase [EC:2.1.2.1] | (RefSeq) serine hydroxymethyltransferase 4	http://www.genome.jp/dbget-bin/www_bget?sot:102580488	-	Pyridoxal phosphate-dependent transferase, subdomain 2||Serine hydroxymethyltransferase, pyridoxal phosphate binding site||Serine hydroxymethyltransferase||Pyridoxal phosphate-dependent transferase, major region, subdomain 1||Pyridoxal phosphate-dependent transferase
314	PGSC0003DMG400015835	44.6524	7.24752	2.6232	0.0032477	0.028697	UP	GO:0006793//GO:0008152//GO:0044260//GO:0071704//GO:0008150//GO:0043412//GO:0006796//GO:0009987//GO:0044237//GO:0006464//GO:0043170//GO:0016310//GO:0044267//GO:0019538//GO:0036211//GO:0006468//GO:0044238	phosphorus metabolic process//metabolic process//cellular macromolecule metabolic process//organic substance metabolic process//biological_process//macromolecule modification//phosphate-containing compound metabolic process//cellular process//cellular metabolic process//cellular protein modification process//macromolecule metabolic process//phosphorylation//cellular protein metabolic process//pro…	GO:0005575//GO:0016020//GO:0044425//GO:0016021//GO:0031224	cellular_component//membrane//membrane part//integral component of membrane//intrinsic component of membrane	GO:0032555//GO:0035639//GO:0032550//GO:0016301//GO:0005524//GO:0032553//GO:0036094//GO:0003674//GO:0043167//GO:0016740//GO:1901363//GO:0030554//GO:0003824//GO:0097159//GO:0005488//GO:0032559//GO:0032549//GO:0043168//GO:0017076//GO:0097367//GO:1901265//GO:0004672//GO:0016772//GO:0001882//GO:0000166//GO:0001883//GO:0016773//GO:0004674	purine ribonucleotide binding//purine ribonucleoside triphosphate binding//purine ribonucleoside binding//kinase activity//ATP binding//ribonucleotide binding//small molecule binding//molecular_function//ion binding//transferase activity//heterocyclic compound binding//adenyl nucleotide binding//catalytic activity//organic cyclic compound binding//binding//adenyl ribonucleotide binding//ribonucle…	K04733 interleukin-1 receptor-associated kinase 4 [EC:2.7.11.1] | (RefSeq) probable receptor-like protein kinase At1g67000	http://www.genome.jp/dbget-bin/www_bget?sot:102582318	-	Wall-associated receptor kinase, C-terminal||Protein kinase-like domain||Protein kinase domain||Protein kinase, ATP binding site||Serine/threonine-protein kinase, active site
315	PGSC0003DMG400015872	580.137	194.171	1.5791	1.2912e-06	4.4253e-05	UP	GO:0008150//GO:0006952//GO:0050896//GO:0006950	biological_process//defense response//response to stimulus//response to stress	--	--	GO:0030554//GO:1901363//GO:0097159//GO:0032553//GO:0032550//GO:0043531//GO:0032555//GO:0043167//GO:0003674//GO:0036094//GO:0001883//GO:0000166//GO:0001882//GO:0043168//GO:0032549//GO:0032559//GO:0005488//GO:1901265//GO:0097367//GO:0017076	adenyl nucleotide binding//heterocyclic compound binding//organic cyclic compound binding//ribonucleotide binding//purine ribonucleoside binding//ADP binding//purine ribonucleotide binding//ion binding//molecular_function//small molecule binding//purine nucleoside binding//nucleotide binding//nucleoside binding//anion binding//ribonucleoside binding//adenyl ribonucleotide binding//binding//nucleo…	no KO assigned | (RefSeq) probable disease resistance RPP8-like protein 2	http://www.genome.jp/dbget-bin/www_bget?sot:102595651	-	P-loop containing nucleoside triphosphate hydrolase||Leucine-rich repeat domain, L domain-like||NB-ARC||Winged helix-turn-helix DNA-binding domain
316	PGSC0003DMG400015893	124.341	43.4193	1.5179	0.0018261	0.018551	UP	GO:0043170//GO:0019222//GO:0019219//GO:0009059//GO:0044237//GO:0006139//GO:1901360//GO:0044271//GO:0046483//GO:0044238//GO:0090304//GO:0010467//GO:0006807//GO:0009058//GO:0050794//GO:0018130//GO:0010556//GO:0060255//GO:0034654//GO:0016070//GO:0034641//GO:0010468//GO:0032774//GO:0065007//GO:0071704//GO:0097659//GO:0006351//GO:0034645//GO:0006725//GO:1901576//GO:0044260//GO:2001141//GO:0051252//GO:…	macromolecule metabolic process//regulation of metabolic process//regulation of nucleobase-containing compound metabolic process//macromolecule biosynthetic process//cellular metabolic process//nucleobase-containing compound metabolic process//organic cyclic compound metabolic process//cellular nitrogen compound biosynthetic process//heterocycle metabolic process//primary metabolic process//nucle…	GO:0043229//GO:0044424//GO:0044464//GO:0005622//GO:0005634//GO:0005623//GO:0043227//GO:0005575//GO:0043231//GO:0043226	intracellular organelle//intracellular part//cell part//intracellular//nucleus//cell//membrane-bounded organelle//cellular_component//intracellular membrane-bounded organelle//organelle	GO:0005488//GO:0003677//GO:0003674//GO:0097159//GO:0003676//GO:1901363	binding//DNA binding//molecular_function//organic cyclic compound binding//nucleic acid binding//heterocyclic compound binding	no KO assigned | (RefSeq) putative Myb family transcription factor At1g14600	http://www.genome.jp/dbget-bin/www_bget?sot:102592874	-	Myb domain, plants||Myb domain||Homeobox domain-like||SANT/Myb domain
317	PGSC0003DMG400015948	123.357	8.50987	3.8576	0.0012681	0.013945	UP	--	--	GO:0016021//GO:0044425//GO:0031224//GO:0016020//GO:0005575	integral component of membrane//membrane part//intrinsic component of membrane//membrane//cellular_component	--	--	no KO assigned | (RefSeq) uncharacterized LOC102590249	http://www.genome.jp/dbget-bin/www_bget?sot:102590249	--	--
318	PGSC0003DMG400016050	137.159	40.9691	1.7432	0.00062392	0.0080256	UP	GO:0008150//GO:0008152	biological_process//metabolic process	--	--	GO:0016740//GO:0003824//GO:0003674//GO:0016757//GO:0016758	transferase activity//catalytic activity//molecular_function//transferase activity, transferring glycosyl groups//transferase activity, transferring hexosyl groups	K21354 beta-D-glucosyl crocetin beta-1,6-glucosyltransferase [EC:2.4.1.330] | (RefSeq) beta-D-glucosyl crocetin beta-1,6-glucosyltransferase-like	http://www.genome.jp/dbget-bin/www_bget?sot:102604958	-	UDP-glycosyltransferase family, conserved site||UDP-glucuronosyl/UDP-glucosyltransferase
319	PGSC0003DMG400016051	326.862	156.981	1.0581	0.0041233	0.034314	UP	GO:0008150//GO:0008152	biological_process//metabolic process	--	--	GO:0016740//GO:0003824//GO:0003674//GO:0016757//GO:0016758	transferase activity//catalytic activity//molecular_function//transferase activity, transferring glycosyl groups//transferase activity, transferring hexosyl groups	K21354 beta-D-glucosyl crocetin beta-1,6-glucosyltransferase [EC:2.4.1.330] | (RefSeq) beta-D-glucosyl crocetin beta-1,6-glucosyltransferase-like	http://www.genome.jp/dbget-bin/www_bget?sot:102604618	-	UDP-glucuronosyl/UDP-glucosyltransferase
320	PGSC0003DMG400016091	265.822	56.7084	2.2288	4.6349e-07	1.8451e-05	UP	GO:0019538//GO:0044238//GO:0043170//GO:0008150//GO:0071704//GO:0006508//GO:0008152	protein metabolic process//primary metabolic process//macromolecule metabolic process//biological_process//organic substance metabolic process//proteolysis//metabolic process	--	--	GO:0008233//GO:0070011//GO:0017171//GO:0003824//GO:0003674//GO:0008236//GO:0004175//GO:0016787//GO:0004252	peptidase activity//peptidase activity, acting on L-amino acid peptides//serine hydrolase activity//catalytic activity//molecular_function//serine-type peptidase activity//endopeptidase activity//hydrolase activity//serine-type endopeptidase activity	no KO assigned | (RefSeq) subtilisin-like protease SBT1.7	http://www.genome.jp/dbget-bin/www_bget?sot:102596363	-	Peptidase S8/S53 domain||Peptidase S8 propeptide/proteinase inhibitor I9||Peptidase S8, subtilisin-related||PA domain||Peptidase S8, subtilisin, Asp-active site||Cucumisin-like catalytic domain
321	PGSC0003DMG400016140	2607.65	763.594	1.7719	0.00041002	0.0056863	UP	GO:0046907//GO:0006810//GO:0051234//GO:0008150//GO:0006839//GO:0051649//GO:0051641//GO:0051179	intracellular transport//transport//establishment of localization//biological_process//mitochondrial transport//establishment of localization in cell//cellular localization//localization	GO:0043226//GO:0031975//GO:0005740//GO:0043231//GO:0005575//GO:0044429//GO:0005739//GO:0016020//GO:0043227//GO:0005737//GO:0005622//GO:0044464//GO:0031224//GO:0031967//GO:0044444//GO:0005623//GO:0043229//GO:0044446//GO:0044422//GO:0016021//GO:0031090//GO:0031966//GO:0044424//GO:0044425	organelle//envelope//mitochondrial envelope//intracellular membrane-bounded organelle//cellular_component//mitochondrial part//mitochondrion//membrane//membrane-bounded organelle//cytoplasm//intracellular//cell part//intrinsic component of membrane//organelle envelope//cytoplasmic part//cell//intracellular organelle//intracellular organelle part//organelle part//integral component of membrane//or…	--	--	K15104 solute carrier family 25 (mitochondrial oxoglutarate transporter), member 11 | (RefSeq) mitochondrial uncoupling protein 5-like	http://www.genome.jp/dbget-bin/www_bget?sot:102579771	-	Mitochondrial carrier UCP-like||Mitochondrial substrate/solute carrier||Mitochondrial carrier domain
322	PGSC0003DMG400016143	10094.8	3931.48	1.3605	2.6959e-07	1.1434e-05	UP	GO:0055085//GO:0051179//GO:0050896//GO:0042493//GO:0006855//GO:0015893//GO:0009987//GO:0051234//GO:0006810//GO:0042221//GO:0008150	transmembrane transport//localization//response to stimulus//response to drug//drug transmembrane transport//drug transport//cellular process//establishment of localization//transport//response to chemical//biological_process	GO:0016021//GO:0044425//GO:0031224//GO:0016020//GO:0005575	integral component of membrane//membrane part//intrinsic component of membrane//membrane//cellular_component	GO:0005215//GO:0022804//GO:0015291//GO:0003674//GO:0015297//GO:0015238//GO:0022857	transporter activity//active transmembrane transporter activity//secondary active transmembrane transporter activity//molecular_function//antiporter activity//drug transmembrane transporter activity//transmembrane transporter activity	K03327 multidrug resistance protein, MATE family | (RefSeq) protein DETOXIFICATION 27-like	http://www.genome.jp/dbget-bin/www_bget?sot:102583640	-	Multi antimicrobial extrusion protein
323	PGSC0003DMG400016188	40.8814	2.19327	4.2203	0.0032482	0.028697	UP	GO:0006928//GO:0007017//GO:0007018//GO:0008150//GO:0009987	movement of cell or subcellular component//microtubule-based process//microtubule-based movement//biological_process//cellular process	--	--	GO:0016817//GO:0032549//GO:0032559//GO:0008017//GO:0003774//GO:0005488//GO:0043168//GO:0017076//GO:1901265//GO:0097367//GO:0003777//GO:0001882//GO:0001883//GO:0000166//GO:0017111//GO:0005515//GO:0044877//GO:0016787//GO:0032550//GO:0035639//GO:0032555//GO:0032553//GO:0005524//GO:0008092//GO:0003674//GO:0016818//GO:0036094//GO:0015631//GO:0043167//GO:0003824//GO:0030554//GO:1901363//GO:0097159//GO:…	hydrolase activity, acting on acid anhydrides//ribonucleoside binding//adenyl ribonucleotide binding//microtubule binding//motor activity//binding//anion binding//purine nucleotide binding//nucleoside phosphate binding//carbohydrate derivative binding//microtubule motor activity//nucleoside binding//purine nucleoside binding//nucleotide binding//nucleoside-triphosphatase activity//protein binding…	K10406 kinesin family member C2/C3 | (RefSeq) kinesin KP1	http://www.genome.jp/dbget-bin/www_bget?sot:102596999	-	Malectin||P-loop containing nucleoside triphosphate hydrolase||Kinesin motor domain||Kinesin motor domain, conserved site
324	PGSC0003DMG400016192	30.3155	0.573049	5.7253	6.5604e-05	0.0012903	UP	GO:0008152//GO:0008150	metabolic process//biological_process	--	--	GO:0016758//GO:0016757//GO:0003674//GO:0003824//GO:0016740	transferase activity, transferring hexosyl groups//transferase activity, transferring glycosyl groups//molecular_function//catalytic activity//transferase activity	no KO assigned | (RefSeq) UDP-glycosyltransferase 91A1-like	http://www.genome.jp/dbget-bin/www_bget?sot:102599831	-	UDP-glucuronosyl/UDP-glucosyltransferase
325	PGSC0003DMG400016243	243.104	95.4764	1.3484	0.0012434	0.013736	UP	--	--	--	--	--	--	--	--	--	--
326	PGSC0003DMG400016381	143.074	36.891	1.9554	0.00011495	0.002045	UP	--	--	--	--	--	--	--	--	--	--
327	PGSC0003DMG400016386	29.8806	3.24534	3.2028	0.0044022	0.036021	UP	--	--	GO:0005575//GO:0016020	cellular_component//membrane	--	--	K17338 receptor expression-enhancing protein 1/2/3/4 | (RefSeq) putative HVA22-like protein g	http://www.genome.jp/dbget-bin/www_bget?sot:102585262	-	TB2/DP1/HVA22-related protein
328	PGSC0003DMG400016450	161.563	44.5725	1.8579	0.00011605	0.002063	UP	--	--	--	--	--	--	--	--	--	--
329	PGSC0003DMG400016478	310.99	98.7318	1.6553	1.9292e-05	0.00045983	UP	GO:0006807//GO:0009058//GO:1902221//GO:0043436//GO:0044238//GO:0009094//GO:1901607//GO:0019752//GO:0046394//GO:0009072//GO:0006558//GO:1901360//GO:0044237//GO:0016053//GO:1902223//GO:0006082//GO:0008652//GO:1901362//GO:0044281//GO:0009987//GO:0008150//GO:1901564//GO:1901566//GO:0044249//GO:0044283//GO:0019438//GO:0006520//GO:1901576//GO:0006725//GO:0009073//GO:0071704//GO:1901605//GO:0009095//GO:…	nitrogen compound metabolic process//biosynthetic process//erythrose 4-phosphate/phosphoenolpyruvate family amino acid metabolic process//oxoacid metabolic process//primary metabolic process//L-phenylalanine biosynthetic process//alpha-amino acid biosynthetic process//carboxylic acid metabolic process//carboxylic acid biosynthetic process//aromatic amino acid family metabolic process//L-phenylala…	GO:0005622//GO:0044464//GO:0044434//GO:0005623//GO:0044444//GO:0044422//GO:0044446//GO:0043229//GO:0044435//GO:0044424//GO:0009532//GO:0043226//GO:0009570//GO:0009536//GO:0005575//GO:0043231//GO:0043227//GO:0005737//GO:0009507	intracellular//cell part//chloroplast part//cell//cytoplasmic part//organelle part//intracellular organelle part//intracellular organelle//plastid part//intracellular part//plastid stroma//organelle//chloroplast stroma//plastid//cellular_component//intracellular membrane-bounded organelle//membrane-bounded organelle//cytoplasm//chloroplast	GO:0016835//GO:0047769//GO:0016836//GO:0004664//GO:0003824//GO:0003674//GO:0016829	carbon-oxygen lyase activity//arogenate dehydratase activity//hydro-lyase activity//prephenate dehydratase activity//catalytic activity//molecular_function//lyase activity	K05359 arogenate/prephenate dehydratase [EC:4.2.1.91 4.2.1.51] | (RefSeq) arogenate dehydratase/prephenate dehydratase 1, chloroplastic	http://www.genome.jp/dbget-bin/www_bget?sot:102599157	ADT1	Prephenate dehydratase||Prephenate dehydratase, conserved site||ACT domain
330	PGSC0003DMG400016530	299.127	88.3196	1.76	0.00086321	0.010437	UP	GO:0055085//GO:0051179//GO:0051234//GO:0006810//GO:0008150//GO:0009987	transmembrane transport//localization//establishment of localization//transport//biological_process//cellular process	GO:0044424//GO:0044425//GO:0043229//GO:0044446//GO:0044422//GO:0016021//GO:0044444//GO:0005623//GO:0005622//GO:0044464//GO:0012505//GO:0031224//GO:0005802//GO:0005794//GO:0098791//GO:0005737//GO:0043231//GO:0005575//GO:0016020//GO:0043227//GO:0031984//GO:0044431//GO:0005768//GO:0043226	intracellular part//membrane part//intracellular organelle//intracellular organelle part//organelle part//integral component of membrane//cytoplasmic part//cell//intracellular//cell part//endomembrane system//intrinsic component of membrane//trans-Golgi network//Golgi apparatus//Golgi subcompartment//cytoplasm//intracellular membrane-bounded organelle//cellular_component//membrane//membrane-bound…	GO:0005215//GO:0003674//GO:0022857	transporter activity//molecular_function//transmembrane transporter activity	no KO assigned | (RefSeq) probable plastidic glucose transporter 3	http://www.genome.jp/dbget-bin/www_bget?sot:102605214	SGB1	Major facilitator superfamily domain||Sugar transporter, conserved site||Major facilitator, sugar transporter-like||-||Sugar/inositol transporter
331	PGSC0003DMG400016608	2153.12	763.076	1.4965	0.0024719	0.023317	UP	--	--	--	--	GO:0005515//GO:0046983//GO:0005488//GO:0003674	protein binding//protein dimerization activity//binding//molecular_function	no KO assigned | (RefSeq) transcription factor bHLH62	http://www.genome.jp/dbget-bin/www_bget?sot:102599641	-	Myc-type, basic helix-loop-helix (bHLH) domain
332	PGSC0003DMG400016623	2440.3	769.269	1.6655	5.0766e-05	0.0010442	UP	GO:0055114//GO:0008150//GO:0008152	oxidation-reduction process//biological_process//metabolic process	--	--	GO:0046914//GO:0043169//GO:0016705//GO:0020037//GO:0046872//GO:0004497//GO:0005488//GO:0097159//GO:0016491//GO:0003824//GO:1901363//GO:0003674//GO:0043167//GO:0005506//GO:0046906	transition metal ion binding//cation binding//oxidoreductase activity, acting on paired donors, with incorporation or reduction of molecular oxygen//heme binding//metal ion binding//monooxygenase activity//binding//organic cyclic compound binding//oxidoreductase activity//catalytic activity//heterocyclic compound binding//molecular_function//ion binding//iron ion binding//tetrapyrrole binding	no KO assigned | (RefSeq) geraniol 8-hydroxylase-like	http://www.genome.jp/dbget-bin/www_bget?sot:102603896	-	Cytochrome P450, E-class, group I||Cytochrome P450||Cytochrome P450, conserved site
333	PGSC0003DMG400016627	40.3238	3.30084	3.6107	0.00033138	0.004771	UP	--	--	--	--	--	--	K10400 kinesin family member 15 | (RefSeq) kinesin-like protein KIN12B	http://www.genome.jp/dbget-bin/www_bget?sot:102599317	--	--
334	PGSC0003DMG400016880	145.764	20.4878	2.8308	1.1495e-07	5.4147e-06	UP	--	--	--	--	GO:0016757//GO:0003674//GO:0016740//GO:0003824	transferase activity, transferring glycosyl groups//molecular_function//transferase activity//catalytic activity	K20893 probable galacturonosyltransferase-like 1 [EC:2.4.1.-] | (RefSeq) probable galacturonosyltransferase-like 1	http://www.genome.jp/dbget-bin/www_bget?sot:102594984	-	Glycosyl transferase, family 8||Nucleotide-diphospho-sugar transferases
335	PGSC0003DMG400017110	46.9155	0	Inf	7.7105e-09	4.7797e-07	UP	GO:0008152//GO:0044264//GO:0044262//GO:0034645//GO:0071704//GO:0030243//GO:0005975//GO:0030244//GO:1901576//GO:0044260//GO:0051273//GO:0016051//GO:0008150//GO:0044249//GO:0009250//GO:0009987//GO:0033692//GO:0044237//GO:0044042//GO:0043170//GO:0009059//GO:0000271//GO:0051274//GO:0034637//GO:0016043//GO:0005976//GO:0071554//GO:0006073//GO:0044238//GO:0071555//GO:0009058//GO:0071840//GO:0045229	metabolic process//cellular polysaccharide metabolic process//cellular carbohydrate metabolic process//cellular macromolecule biosynthetic process//organic substance metabolic process//cellulose metabolic process//carbohydrate metabolic process//cellulose biosynthetic process//organic substance biosynthetic process//cellular macromolecule metabolic process//beta-glucan metabolic process//carbohyd…	GO:0016020//GO:0005575//GO:0044425//GO:0016021//GO:0031224	membrane//cellular_component//membrane part//integral component of membrane//intrinsic component of membrane	GO:0016759//GO:0003674//GO:0016757//GO:0008194//GO:0003824//GO:0016760//GO:0016740//GO:0035251//GO:0016758//GO:0046527	cellulose synthase activity//molecular_function//transferase activity, transferring glycosyl groups//UDP-glycosyltransferase activity//catalytic activity//cellulose synthase (UDP-forming) activity//transferase activity//UDP-glucosyltransferase activity//transferase activity, transferring hexosyl groups//glucosyltransferase activity	no KO assigned | (RefSeq) cellulose synthase-like protein H1	http://www.genome.jp/dbget-bin/www_bget?sot:102583176	-	Cellulose synthase||Nucleotide-diphospho-sugar transferases
336	PGSC0003DMG400017151	5683.02	2713.41	1.0666	4.4937e-05	0.00094027	UP	GO:0034641//GO:0044267//GO:0006807//GO:0019538//GO:0009058//GO:0010467//GO:0043603//GO:0006412//GO:0044238//GO:0043043//GO:0044271//GO:0044237//GO:0009059//GO:0043170//GO:1901564//GO:0008150//GO:0044249//GO:1901566//GO:0009987//GO:0008152//GO:0043604//GO:1901576//GO:0044260//GO:0034645//GO:0006518//GO:0071704	cellular nitrogen compound metabolic process//cellular protein metabolic process//nitrogen compound metabolic process//protein metabolic process//biosynthetic process//gene expression//cellular amide metabolic process//translation//primary metabolic process//peptide biosynthetic process//cellular nitrogen compound biosynthetic process//cellular metabolic process//macromolecule biosynthetic proces…	GO:0043228//GO:0044444//GO:0005623//GO:0005622//GO:0044464//GO:0043232//GO:0044424//GO:0043229//GO:0043226//GO:0005840//GO:0005737//GO:0005575//GO:0032991	non-membrane-bounded organelle//cytoplasmic part//cell//intracellular//cell part//intracellular non-membrane-bounded organelle//intracellular part//intracellular organelle//organelle//ribosome//cytoplasm//cellular_component//protein-containing complex	GO:0003735//GO:0005198//GO:0003674	structural constituent of ribosome//structural molecule activity//molecular_function	K02894 large subunit ribosomal protein L23e | (RefSeq) 60S ribosomal protein L23	http://www.genome.jp/dbget-bin/www_bget?sot:102601959	-	Ribosomal protein L14P, conserved site||Ribosomal protein L14P
337	PGSC0003DMG400017154	401.612	142.133	1.4986	2.9065e-05	0.00065804	UP	--	--	GO:0016021//GO:0044425//GO:0031224//GO:0016020//GO:0005575	integral component of membrane//membrane part//intrinsic component of membrane//membrane//cellular_component	--	--	no KO assigned | (RefSeq) uncharacterized LOC102596176	http://www.genome.jp/dbget-bin/www_bget?sot:102596176	-	Protein of unknown function DUF716 (TMEM45)
338	PGSC0003DMG400017186	87.0004	18.2302	2.2547	0.00031277	0.0045515	UP	GO:0032870//GO:0000160//GO:0048523//GO:0065007//GO:0050896//GO:0044267//GO:0010105//GO:0050794//GO:0018202//GO:1902532//GO:0035556//GO:0019538//GO:0006468//GO:0044238//GO:0036211//GO:0070887//GO:0007165//GO:0018106//GO:0023051//GO:0009719//GO:0044237//GO:0051716//GO:1902531//GO:0010646//GO:0070297//GO:0018193//GO:0006464//GO:0010648//GO:0010104//GO:0007154//GO:0043170//GO:0010033//GO:0016310//GO:…	cellular response to hormone stimulus//phosphorelay signal transduction system//negative regulation of cellular process//biological regulation//response to stimulus//cellular protein metabolic process//negative regulation of ethylene-activated signaling pathway//regulation of cellular process//peptidyl-histidine modification//negative regulation of intracellular signal transduction//intracellular…	GO:0044432//GO:0005623//GO:0044444//GO:0005622//GO:0044464//GO:0031224//GO:0012505//GO:0044424//GO:0044425//GO:0016021//GO:0044422//GO:0044446//GO:0043229//GO:0031090//GO:0005783//GO:0043226//GO:0042175//GO:0005737//GO:0005789//GO:0005575//GO:0043231//GO:0098588//GO:0043227//GO:0016020	endoplasmic reticulum part//cell//cytoplasmic part//intracellular//cell part//intrinsic component of membrane//endomembrane system//intracellular part//membrane part//integral component of membrane//organelle part//intracellular organelle part//intracellular organelle//organelle membrane//endoplasmic reticulum//organelle//nuclear outer membrane-endoplasmic reticulum membrane network//cytoplasm//e…	GO:0004672//GO:0016772//GO:0016775//GO:0016773//GO:0000155//GO:0060089//GO:0005057//GO:0043169//GO:0005488//GO:0004871//GO:0046872//GO:0016740//GO:0003824//GO:0004673//GO:0016301//GO:0051740//GO:0072328//GO:0003674//GO:0038023//GO:0038199//GO:0043167	protein kinase activity//transferase activity, transferring phosphorus-containing groups//phosphotransferase activity, nitrogenous group as acceptor//phosphotransferase activity, alcohol group as acceptor//phosphorelay sensor kinase activity//molecular transducer activity//obsolete signal transducer activity, downstream of receptor//cation binding//binding//obsolete signal transducer activity//me…	K14509 ethylene receptor [EC:2.7.13.-] | (RefSeq) ethylene receptor 2-like	http://www.genome.jp/dbget-bin/www_bget?sot:102599512	-	Ethylene receptor||Signal transduction response regulator, receiver domain||GAF domain-like||Signal transduction histidine kinase, dimerisation/phosphoacceptor domain||GAF domain||Histidine kinase-like ATPase, C-terminal domain||Histidine kinase domain||CheY-like superfamily
339	PGSC0003DMG400017187	2482.43	1173.88	1.0805	0.00012414	0.0021723	UP	--	--	GO:0016020//GO:0005575//GO:0031224//GO:0016021//GO:0044425	membrane//cellular_component//intrinsic component of membrane//integral component of membrane//membrane part	--	--	no KO assigned | (RefSeq) uncharacterized LOC102601960	http://www.genome.jp/dbget-bin/www_bget?sot:102601960	-	HR-like lesion-inducer
340	PGSC0003DMG400017204	905.85	283.608	1.6754	0.0027736	0.025384	UP	GO:0051179//GO:0008150//GO:0006810//GO:0051234	localization//biological_process//transport//establishment of localization	GO:0016021//GO:0044425//GO:0031224//GO:0016020//GO:0005575	integral component of membrane//membrane part//intrinsic component of membrane//membrane//cellular_component	GO:0005215//GO:0003674	transporter activity//molecular_function	no KO assigned | (RefSeq) protein NRT1/ PTR FAMILY 5.2-like	http://www.genome.jp/dbget-bin/www_bget?sot:102605994	-	Proton-dependent oligopeptide transporter family||Major facilitator superfamily domain
341	PGSC0003DMG400017233	501.498	33.0623	3.923	1.3006e-09	9.7436e-08	UP	GO:0090304//GO:0044238//GO:0046483//GO:0009058//GO:0006807//GO:0010467//GO:0060255//GO:0010556//GO:0034654//GO:0050794//GO:0018130//GO:0032774//GO:0010468//GO:0065007//GO:0016070//GO:0034641//GO:0019222//GO:0043170//GO:0009059//GO:0019219//GO:0044237//GO:0044271//GO:1901360//GO:0006139//GO:1901362//GO:0080090//GO:0009987//GO:0051171//GO:0019438//GO:2000112//GO:0008150//GO:0031326//GO:0006355//GO:…	nucleic acid metabolic process//primary metabolic process//heterocycle metabolic process//biosynthetic process//nitrogen compound metabolic process//gene expression//regulation of macromolecule metabolic process//regulation of macromolecule biosynthetic process//nucleobase-containing compound biosynthetic process//regulation of cellular process//heterocycle biosynthetic process//RNA biosynthetic …	GO:0044464//GO:0005634//GO:0005622//GO:0005623//GO:0043229//GO:0044424//GO:0043226//GO:0043227//GO:0043231//GO:0005575	cell part//nucleus//intracellular//cell//intracellular organelle//intracellular part//organelle//membrane-bounded organelle//intracellular membrane-bounded organelle//cellular_component	GO:0003677//GO:0005488//GO:0097159//GO:1901363//GO:0003676//GO:0003700//GO:0003674	DNA binding//binding//organic cyclic compound binding//heterocyclic compound binding//nucleic acid binding//DNA-binding transcription factor activity//molecular_function	no KO assigned | (RefSeq) ethylene-responsive transcription factor ERF096-like	http://www.genome.jp/dbget-bin/www_bget?sot:102593271	-	AP2/ERF domain||AP2/ERF transcription factor ERF/PTI6||DNA-binding domain
342	PGSC0003DMG400017284	111.642	28.0762	1.9915	0.00042901	0.0058948	UP	GO:0044237//GO:0006464//GO:0016310//GO:0043170//GO:0044267//GO:0019538//GO:0044238//GO:0006468//GO:0036211//GO:0006793//GO:0008152//GO:0044260//GO:0071704//GO:0008150//GO:0043412//GO:0006796//GO:0009987	cellular metabolic process//cellular protein modification process//phosphorylation//macromolecule metabolic process//cellular protein metabolic process//protein metabolic process//primary metabolic process//protein phosphorylation//protein modification process//phosphorus metabolic process//metabolic process//cellular macromolecule metabolic process//organic substance metabolic process//biologica…	GO:0044425//GO:0016021//GO:0031224//GO:0005575//GO:0016020	membrane part//integral component of membrane//intrinsic component of membrane//cellular_component//membrane	GO:0032549//GO:0032559//GO:0005488//GO:0043168//GO:0017076//GO:1901265//GO:0097367//GO:0001882//GO:0016772//GO:0004672//GO:0001883//GO:0000166//GO:0016773//GO:0004674//GO:0032550//GO:0035639//GO:0032555//GO:0032553//GO:0005524//GO:0016301//GO:0003674//GO:0036094//GO:0043167//GO:0016740//GO:0003824//GO:0030554//GO:1901363//GO:0097159	ribonucleoside binding//adenyl ribonucleotide binding//binding//anion binding//purine nucleotide binding//nucleoside phosphate binding//carbohydrate derivative binding//nucleoside binding//transferase activity, transferring phosphorus-containing groups//protein kinase activity//purine nucleoside binding//nucleotide binding//phosphotransferase activity, alcohol group as acceptor//protein serine/th…	K04733 interleukin-1 receptor-associated kinase 4 [EC:2.7.11.1] | (RefSeq) G-type lectin S-receptor-like serine/threonine-protein kinase SD2-5	http://www.genome.jp/dbget-bin/www_bget?sot:102588471	-	S-receptor-like serine/threonine-protein kinase||PAN/Apple domain||Protein kinase-like domain||Protein kinase, ATP binding site||Protein kinase domain||Bulb-type lectin domain||Serine/threonine-protein kinase, active site
343	PGSC0003DMG400017286	101.192	20.8708	2.2775	0.00018271	0.0029818	UP	GO:0044260//GO:0071704//GO:0006793//GO:0008152//GO:0006796//GO:0009987//GO:0008150//GO:0043412//GO:0006464//GO:0016310//GO:0043170//GO:0044237//GO:0019538//GO:0044238//GO:0006468//GO:0036211//GO:0044267	cellular macromolecule metabolic process//organic substance metabolic process//phosphorus metabolic process//metabolic process//phosphate-containing compound metabolic process//cellular process//biological_process//macromolecule modification//cellular protein modification process//phosphorylation//macromolecule metabolic process//cellular metabolic process//protein metabolic process//primary meta…	GO:0005575//GO:0016020//GO:0016021//GO:0044425//GO:0031224	cellular_component//membrane//integral component of membrane//membrane part//intrinsic component of membrane	GO:0003674//GO:0036094//GO:0043167//GO:0032550//GO:0035639//GO:0032555//GO:0032553//GO:0005524//GO:0016301//GO:0097159//GO:0016740//GO:0003824//GO:0030554//GO:1901363//GO:0017076//GO:1901265//GO:0097367//GO:0032549//GO:0032559//GO:0005488//GO:0043168//GO:0016773//GO:0004674//GO:0001882//GO:0016772//GO:0004672//GO:0001883//GO:0000166	molecular_function//small molecule binding//ion binding//purine ribonucleoside binding//purine ribonucleoside triphosphate binding//purine ribonucleotide binding//ribonucleotide binding//ATP binding//kinase activity//organic cyclic compound binding//transferase activity//catalytic activity//adenyl nucleotide binding//heterocyclic compound binding//purine nucleotide binding//nucleoside phosphate b…	K04733 interleukin-1 receptor-associated kinase 4 [EC:2.7.11.1] | (RefSeq) G-type lectin S-receptor-like serine/threonine-protein kinase SD2-5	http://www.genome.jp/dbget-bin/www_bget?sot:102586051	-	PAN/Apple domain||Protein kinase-like domain||S-receptor-like serine/threonine-protein kinase||Bulb-type lectin domain||Serine/threonine-protein kinase, active site||Protein kinase domain||Protein kinase, ATP binding site
344	PGSC0003DMG400017309	1181.2	523.885	1.1729	8.4501e-05	0.0015916	UP	GO:0008150//GO:0071704//GO:0006508//GO:0008152//GO:0019538//GO:0044238//GO:0043170	biological_process//organic substance metabolic process//proteolysis//metabolic process//protein metabolic process//primary metabolic process//macromolecule metabolic process	--	--	GO:0070011//GO:0017171//GO:0003824//GO:0003674//GO:0008236//GO:0004175//GO:0016787//GO:0004252//GO:0008233	peptidase activity, acting on L-amino acid peptides//serine hydrolase activity//catalytic activity//molecular_function//serine-type peptidase activity//endopeptidase activity//hydrolase activity//serine-type endopeptidase activity//peptidase activity	no KO assigned | (RefSeq) subtilisin-like protease SBT5.3	http://www.genome.jp/dbget-bin/www_bget?sot:102604627	AIR3	Peptidase S8/S53 domain||Peptidase S8 propeptide/proteinase inhibitor I9||PA domain||Cucumisin-like catalytic domain
345	PGSC0003DMG400017318	437.081	201.946	1.1139	0.0015933	0.016687	UP	GO:0006793//GO:0008152//GO:0044260//GO:0071704//GO:0008150//GO:0043412//GO:0006796//GO:0009987//GO:0044237//GO:0006464//GO:0016310//GO:0043170//GO:0044267//GO:0019538//GO:0036211//GO:0044238//GO:0006468	phosphorus metabolic process//metabolic process//cellular macromolecule metabolic process//organic substance metabolic process//biological_process//macromolecule modification//phosphate-containing compound metabolic process//cellular process//cellular metabolic process//cellular protein modification process//phosphorylation//macromolecule metabolic process//cellular protein metabolic process//pro…	GO:0005575//GO:0016020//GO:0044425//GO:0016021//GO:0031224	cellular_component//membrane//membrane part//integral component of membrane//intrinsic component of membrane	GO:0032550//GO:0032555//GO:0035639//GO:0005524//GO:0032553//GO:0016301//GO:0036094//GO:0003674//GO:0043167//GO:0016740//GO:0003824//GO:0030554//GO:1901363//GO:0097159//GO:0032549//GO:0032559//GO:0005488//GO:0043168//GO:0017076//GO:1901265//GO:0097367//GO:0016772//GO:0001882//GO:0004672//GO:0001883//GO:0000166//GO:0016773	purine ribonucleoside binding//purine ribonucleotide binding//purine ribonucleoside triphosphate binding//ATP binding//ribonucleotide binding//kinase activity//small molecule binding//molecular_function//ion binding//transferase activity//catalytic activity//adenyl nucleotide binding//heterocyclic compound binding//organic cyclic compound binding//ribonucleoside binding//adenyl ribonucleotide bin…	no KO assigned | (RefSeq) G-type lectin S-receptor-like serine/threonine-protein kinase SD2-5	http://www.genome.jp/dbget-bin/www_bget?sot:102583737	-	Protein kinase-like domain||PAN/Apple domain||Protein kinase, ATP binding site||Protein kinase domain
346	PGSC0003DMG400017334	1138.56	515.065	1.1444	9.5243e-05	0.0017584	UP	GO:0044271//GO:0006139//GO:1901360//GO:0044237//GO:0009059//GO:0019219//GO:0019222//GO:0043170//GO:0065007//GO:0010468//GO:0032774//GO:0034641//GO:0016070//GO:0034654//GO:0010556//GO:0060255//GO:0018130//GO:0050794//GO:0009058//GO:0006807//GO:0010467//GO:0090304//GO:0046483//GO:0044238//GO:1903506//GO:0008152//GO:0051252//GO:2001141//GO:1901576//GO:0044260//GO:0006725//GO:0006351//GO:0034645//GO:…	cellular nitrogen compound biosynthetic process//nucleobase-containing compound metabolic process//organic cyclic compound metabolic process//cellular metabolic process//macromolecule biosynthetic process//regulation of nucleobase-containing compound metabolic process//regulation of metabolic process//macromolecule metabolic process//biological regulation//regulation of gene expression//RNA biosy…	GO:0044424//GO:0043229//GO:0005623//GO:0005634//GO:0005622//GO:0044464//GO:0043231//GO:0005575//GO:0043227//GO:0043226	intracellular part//intracellular organelle//cell//nucleus//intracellular//cell part//intracellular membrane-bounded organelle//cellular_component//membrane-bounded organelle//organelle	GO:0005488//GO:0003677//GO:0003674//GO:0003700//GO:0043565//GO:1901363//GO:0003676//GO:0097159	binding//DNA binding//molecular_function//DNA-binding transcription factor activity//sequence-specific DNA binding//heterocyclic compound binding//nucleic acid binding//organic cyclic compound binding	K09419 heat shock transcription factor, other eukaryote | (RefSeq) heat stress transcription factor A-4c-like	http://www.genome.jp/dbget-bin/www_bget?sot:102590106	-	Heat shock transcription factor family||Heat shock factor (HSF)-type, DNA-binding||Winged helix-turn-helix DNA-binding domain
347	PGSC0003DMG400017387	1103.22	492.55	1.1634	0.0014823	0.015779	UP	--	--	GO:0016020//GO:0005575//GO:0016021//GO:0044425//GO:0031224	membrane//cellular_component//integral component of membrane//membrane part//intrinsic component of membrane	--	--	no KO assigned | (RefSeq) uncharacterized LOC102578915	http://www.genome.jp/dbget-bin/www_bget?sot:102578915	--	--
348	PGSC0003DMG400017439	78.0468	14.8931	2.3897	0.0025718	0.024046	UP	GO:0044271//GO:0006139//GO:1901360//GO:0044237//GO:0009059//GO:0043170//GO:0034641//GO:0006259//GO:0018130//GO:0034654//GO:0009058//GO:0006807//GO:0044238//GO:0046483//GO:0090304//GO:0008152//GO:1901576//GO:0044260//GO:0071704//GO:0034645//GO:0006725//GO:0044249//GO:0071897//GO:0008150//GO:0019438//GO:0006260//GO:0009987//GO:1901362	cellular nitrogen compound biosynthetic process//nucleobase-containing compound metabolic process//organic cyclic compound metabolic process//cellular metabolic process//macromolecule biosynthetic process//macromolecule metabolic process//cellular nitrogen compound metabolic process//DNA metabolic process//heterocycle biosynthetic process//nucleobase-containing compound biosynthetic process//bios…	GO:0044424//GO:0043229//GO:0005623//GO:0044444//GO:0005634//GO:0005622//GO:0044464//GO:0005737//GO:0043231//GO:0005575//GO:0005739//GO:0043227//GO:0043226	intracellular part//intracellular organelle//cell//cytoplasmic part//nucleus//intracellular//cell part//cytoplasm//intracellular membrane-bounded organelle//cellular_component//mitochondrion//membrane-bounded organelle//organelle	GO:0005488//GO:0016772//GO:0003677//GO:0034061//GO:0003887//GO:0016779//GO:0003674//GO:0016740//GO:1901363//GO:0003676//GO:0003824//GO:0097159	binding//transferase activity, transferring phosphorus-containing groups//DNA binding//DNA polymerase activity//DNA-directed DNA polymerase activity//nucleotidyltransferase activity//molecular_function//transferase activity//heterocyclic compound binding//nucleic acid binding//catalytic activity//organic cyclic compound binding	K02321 DNA polymerase alpha subunit B | (RefSeq) DNA polymerase alpha subunit B	http://www.genome.jp/dbget-bin/www_bget?sot:102588311	POLA2	DNA polymerase alpha, subunit B||DNA polymerase alpha/epsilon, subunit B||DNA polymerase alpha, subunit B N-terminal
349	PGSC0003DMG400017457	154.866	9.12798	4.0846	0.0020732	0.020429	UP	GO:0043632//GO:0009987//GO:1904666//GO:0051444//GO:0006511//GO:0000819//GO:0009057//GO:0080090//GO:0010965//GO:0044248//GO:0051302//GO:0031329//GO:0007088//GO:0061136//GO:2000816//GO:0019941//GO:0032435//GO:0048519//GO:0000278//GO:0009895//GO:0051340//GO:2001251//GO:1903363//GO:0009056//GO:0048285//GO:0043412//GO:0007093//GO:0016567//GO:0051304//GO:0051784//GO:0000280//GO:0051246//GO:0010948//GO:…	modification-dependent macromolecule catabolic process//cellular process//regulation of ubiquitin protein ligase activity//negative regulation of ubiquitin-protein transferase activity//ubiquitin-dependent protein catabolic process//sister chromatid segregation//macromolecule catabolic process//regulation of primary metabolic process//regulation of mitotic sister chromatid separation//cellular ca…	--	--	--	--	K02537 mitotic spindle assembly checkpoint protein MAD2 | (RefSeq) mitotic spindle checkpoint protein MAD2	http://www.genome.jp/dbget-bin/www_bget?sot:102590157	MAD2	HORMA domain||Mitotic spindle checkpoint protein Mad2
350	PGSC0003DMG400017569	4236.39	1843.12	1.2007	0.00085941	0.0104	UP	GO:0042592//GO:0065008//GO:0008150//GO:0050789//GO:0019725//GO:0009987//GO:0045454//GO:0050794//GO:0065007	homeostatic process//regulation of biological quality//biological_process//regulation of biological process//cellular homeostasis//cellular process//cell redox homeostasis//regulation of cellular process//biological regulation	GO:0005737//GO:0043227//GO:0043231//GO:0005575//GO:0005783//GO:0043226//GO:0044424//GO:0043229//GO:0044444//GO:0005623//GO:0012505//GO:0044464//GO:0005622	cytoplasm//membrane-bounded organelle//intracellular membrane-bounded organelle//cellular_component//endoplasmic reticulum//organelle//intracellular part//intracellular organelle//cytoplasmic part//cell//endomembrane system//cell part//intracellular	GO:0016853//GO:0003756//GO:0003674//GO:0003824//GO:0016860//GO:0016864	isomerase activity//protein disulfide isomerase activity//molecular_function//catalytic activity//intramolecular oxidoreductase activity//intramolecular oxidoreductase activity, transposing S-S bonds	K09580 protein disulfide-isomerase A1 [EC:5.3.4.1] | (RefSeq) protein disulfide-isomerase-like	http://www.genome.jp/dbget-bin/www_bget?sot:102592089	-	Thioredoxin-like fold||Thioredoxin domain||Disulphide isomerase||Protein disulphide isomerase||Thioredoxin, conserved site
351	PGSC0003DMG400017762	66.0417	13.6043	2.2793	0.0068123	0.049687	UP	--	--	GO:0016020//GO:0005575//GO:0031224//GO:0016021//GO:0044425	membrane//cellular_component//intrinsic component of membrane//integral component of membrane//membrane part	--	--	K10664 E3 ubiquitin-protein ligase ATL6/9/15/31/42/55 [EC:2.3.2.27] | (RefSeq) E3 ubiquitin-protein ligase ATL6-like	http://www.genome.jp/dbget-bin/www_bget?sot:102604905	-	Zinc finger, RING-type||Zinc finger, RING/FYVE/PHD-type
352	PGSC0003DMG400017905	101.05	25.9084	1.9636	0.00066724	0.0084552	UP	--	--	--	--	--	--	no KO assigned | (RefSeq) uncharacterized LOC102598830	http://www.genome.jp/dbget-bin/www_bget?sot:102598830	--	--
353	PGSC0003DMG400017969	421.296	178.76	1.2368	0.0058051	0.044212	UP	--	--	GO:0031224//GO:0044425//GO:0016021//GO:0016020//GO:0005575	intrinsic component of membrane//membrane part//integral component of membrane//membrane//cellular_component	--	--	no KO assigned | (RefSeq) receptor-like protein 12	http://www.genome.jp/dbget-bin/www_bget?sot:102583983	-	Leucine-rich repeat||Leucine-rich repeat, typical subtype||Leucine-rich repeat domain, L domain-like
354	PGSC0003DMG400018135	344.354	86.6593	1.9905	0.00018827	0.003055	UP	GO:0008152//GO:0008150//GO:0055114	metabolic process//biological_process//oxidation-reduction process	--	--	GO:0046906//GO:0005506//GO:0043167//GO:0003674//GO:0003824//GO:1901363//GO:0016491//GO:0097159//GO:0004497//GO:0005488//GO:0046872//GO:0020037//GO:0016705//GO:0043169//GO:0046914	tetrapyrrole binding//iron ion binding//ion binding//molecular_function//catalytic activity//heterocyclic compound binding//oxidoreductase activity//organic cyclic compound binding//monooxygenase activity//binding//metal ion binding//heme binding//oxidoreductase activity, acting on paired donors, with incorporation or reduction of molecular oxygen//cation binding//transition metal ion binding	no KO assigned | (RefSeq) cytochrome P450 71A4-like	http://www.genome.jp/dbget-bin/www_bget?sot:102589634	-	Cytochrome P450||Cytochrome P450, conserved site||Cytochrome P450, E-class, group I
355	PGSC0003DMG400018180	10858.4	5160.44	1.0732	3.5494e-05	0.00077704	UP	GO:0044260//GO:1901576//GO:0043604//GO:0071704//GO:0006518//GO:0034645//GO:0008152//GO:0009987//GO:1901566//GO:0044249//GO:0008150//GO:1901564//GO:0009059//GO:0043170//GO:0044271//GO:0043043//GO:0044237//GO:0043603//GO:0010467//GO:0009058//GO:0019538//GO:0006807//GO:0044238//GO:0006412//GO:0034641//GO:0044267	cellular macromolecule metabolic process//organic substance biosynthetic process//amide biosynthetic process//organic substance metabolic process//peptide metabolic process//cellular macromolecule biosynthetic process//metabolic process//cellular process//organonitrogen compound biosynthetic process//cellular biosynthetic process//biological_process//organonitrogen compound metabolic process//mac…	GO:0005575//GO:0032991//GO:0005840//GO:0005737//GO:0043226//GO:0044446//GO:0043229//GO:0044422//GO:0043232//GO:0044391//GO:0044424//GO:0005622//GO:0044464//GO:0015934//GO:0043228//GO:0005623//GO:0044444	cellular_component//protein-containing complex//ribosome//cytoplasm//organelle//intracellular organelle part//intracellular organelle//organelle part//intracellular non-membrane-bounded organelle//ribosomal subunit//intracellular part//intracellular//cell part//large ribosomal subunit//non-membrane-bounded organelle//cell//cytoplasmic part	GO:0003674//GO:0003735//GO:0005198	molecular_function//structural constituent of ribosome//structural molecule activity	K02900 large subunit ribosomal protein L27Ae | (RefSeq) 60S ribosomal protein L27a-3-like	http://www.genome.jp/dbget-bin/www_bget?sot:102606393	-	Ribosomal protein L15||Ribosomal protein L18e/L15P||Ribosomal protein L15, conserved site
356	PGSC0003DMG400018196	63.5854	6.06552	3.39	2.0328e-05	0.00048182	UP	GO:0008152//GO:0055114//GO:0008150	metabolic process//oxidation-reduction process//biological_process	--	--	GO:0046872//GO:0005488//GO:0004497//GO:0046914//GO:0043169//GO:0016705//GO:0020037//GO:0003674//GO:0043167//GO:0005506//GO:0046906//GO:0097159//GO:0016491//GO:1901363//GO:0003824	metal ion binding//binding//monooxygenase activity//transition metal ion binding//cation binding//oxidoreductase activity, acting on paired donors, with incorporation or reduction of molecular oxygen//heme binding//molecular_function//ion binding//iron ion binding//tetrapyrrole binding//organic cyclic compound binding//oxidoreductase activity//heterocyclic compound binding//catalytic activity	K07408 cytochrome P450 family 1 subfamily A polypeptide 1 [EC:1.14.14.1] | (RefSeq) cytochrome P450 71A6-like	http://www.genome.jp/dbget-bin/www_bget?sot:102589304	-	Cytochrome P450, E-class, group I||Cytochrome P450||Cytochrome P450, conserved site
357	PGSC0003DMG400018289	378.997	159.93	1.2447	0.0015213	0.016127	UP	--	--	--	--	--	--	no KO assigned | (RefSeq) uncharacterized LOC102585087	http://www.genome.jp/dbget-bin/www_bget?sot:102585087	-	X8 domain
358	PGSC0003DMG400018338	506.068	208.641	1.2783	0.00014636	0.0024966	UP	GO:0044238//GO:0071704//GO:0005975//GO:0008152//GO:0008150	primary metabolic process//organic substance metabolic process//carbohydrate metabolic process//metabolic process//biological_process	GO:0016021//GO:0044425//GO:0031224//GO:0016020//GO:0005575	integral component of membrane//membrane part//intrinsic component of membrane//membrane//cellular_component	GO:0016798//GO:0003674//GO:0004553//GO:0016787//GO:0003824	hydrolase activity, acting on glycosyl bonds//molecular_function//hydrolase activity, hydrolyzing O-glycosyl compounds//hydrolase activity//catalytic activity	K19355 mannan endo-1,4-beta-mannosidase [EC:3.2.1.78] | (RefSeq) mannan endo-1,4-beta-mannosidase 2-like	http://www.genome.jp/dbget-bin/www_bget?sot:102592832	-	Glycoside hydrolase superfamily||Glycoside hydrolase, family 5
359	PGSC0003DMG400018382	22.9707	1.48177	3.9544	0.0043362	0.035618	UP	GO:0044238//GO:0046488//GO:0030258//GO:0046486//GO:0006629//GO:0044255//GO:0016310//GO:0006644//GO:0044237//GO:0009987//GO:0046854//GO:0006796//GO:0019637//GO:0008150//GO:0071704//GO:0006650//GO:0008152//GO:0006793//GO:0046834	primary metabolic process//phosphatidylinositol metabolic process//lipid modification//glycerolipid metabolic process//lipid metabolic process//cellular lipid metabolic process//phosphorylation//phospholipid metabolic process//cellular metabolic process//cellular process//phosphatidylinositol phosphorylation//phosphate-containing compound metabolic process//organophosphate metabolic process//biol…	--	--	GO:0016773//GO:0000166//GO:0001883//GO:0001882//GO:0016772//GO:0097367//GO:0016307//GO:1901265//GO:0017076//GO:0016308//GO:0043168//GO:0005488//GO:0032559//GO:0032549//GO:0097159//GO:1901363//GO:0030554//GO:0003824//GO:0016740//GO:0043167//GO:0003674//GO:0036094//GO:0016301//GO:0032553//GO:0005524//GO:0035639//GO:0032555//GO:0032550	phosphotransferase activity, alcohol group as acceptor//nucleotide binding//purine nucleoside binding//nucleoside binding//transferase activity, transferring phosphorus-containing groups//carbohydrate derivative binding//phosphatidylinositol phosphate kinase activity//nucleoside phosphate binding//purine nucleotide binding//1-phosphatidylinositol-4-phosphate 5-kinase activity//anion binding//bind…	K00889 1-phosphatidylinositol-4-phosphate 5-kinase [EC:2.7.1.68] | (RefSeq) phosphatidylinositol 4-phosphate 5-kinase 6-like	http://www.genome.jp/dbget-bin/www_bget?sot:102598119	-	Phosphatidylinositol-4-phosphate 5-kinase, core||Phosphatidylinositol-4-phosphate 5-kinase, N-terminal domain||Phosphatidylinositol-4-phosphate 5-kinase||MORN motif||Phosphatidylinositol-4-phosphate 5-kinase, plant||Phosphatidylinositol-4-phosphate 5-kinase, C-terminal
360	PGSC0003DMG400018405	1166.13	388.214	1.5868	0.0026938	0.024875	UP	GO:0070085//GO:0033692//GO:0009987//GO:0008150//GO:0016051//GO:0044249//GO:0009100//GO:0043412//GO:1901576//GO:0044260//GO:0005975//GO:0044262//GO:0006486//GO:0071704//GO:0034645//GO:1901137//GO:0008152//GO:0044264//GO:0009058//GO:0019538//GO:0005976//GO:0044238//GO:0036211//GO:0009101//GO:0034637//GO:0043413//GO:0000271//GO:0010493//GO:0044267//GO:1901135//GO:0009059//GO:0006464//GO:0043170//GO:…	glycosylation//cellular polysaccharide biosynthetic process//cellular process//biological_process//carbohydrate biosynthetic process//cellular biosynthetic process//glycoprotein metabolic process//macromolecule modification//organic substance biosynthetic process//cellular macromolecule metabolic process//carbohydrate metabolic process//cellular carbohydrate metabolic process//protein glycosylati…	GO:0043226//GO:0005575//GO:0043231//GO:0043227//GO:0016020//GO:0005794//GO:0005737//GO:0005622//GO:0031224//GO:0012505//GO:0044464//GO:0005623//GO:0044444//GO:0016021//GO:0043229//GO:0044425//GO:0044424	organelle//cellular_component//intracellular membrane-bounded organelle//membrane-bounded organelle//membrane//Golgi apparatus//cytoplasm//intracellular//intrinsic component of membrane//endomembrane system//cell part//cell//cytoplasmic part//integral component of membrane//intracellular organelle//membrane part//intracellular part	GO:0016740//GO:0030246//GO:0008194//GO:0003824//GO:0035250//GO:0003674//GO:0016757//GO:0010488//GO:0008378//GO:0016758//GO:0005488	transferase activity//carbohydrate binding//UDP-glycosyltransferase activity//catalytic activity//UDP-galactosyltransferase activity//molecular_function//transferase activity, transferring glycosyl groups//UDP-galactose:N-glycan beta-1,3-galactosyltransferase activity//galactosyltransferase activity//transferase activity, transferring hexosyl groups//binding	K14413 beta-1,3-galactosyltransferase [EC:2.4.1.-] | (RefSeq) beta-1,3-galactosyltransferase 15	http://www.genome.jp/dbget-bin/www_bget?sot:102601182	GALT1	Concanavalin A-like lectin/glucanase domain||Galectin, carbohydrate recognition domain||Glycosyl transferase, family 31
361	PGSC0003DMG400018440	374.064	145.246	1.3648	0.00011162	0.0020025	UP	--	--	--	--	--	--	no KO assigned | (RefSeq) uncharacterized LOC102581775	http://www.genome.jp/dbget-bin/www_bget?sot:102581775	-	Glycosyl hydrolase, five-bladed beta-propellor domain
362	PGSC0003DMG400018548	428.824	69.0096	2.6355	0.00041245	0.0057093	UP	--	--	--	--	--	--	no KO assigned | (RefSeq) protein ABIL3	http://www.genome.jp/dbget-bin/www_bget?sot:102598514	-	ABI family
363	PGSC0003DMG400018756	270.053	115.423	1.2263	0.0014165	0.015198	UP	--	--	--	--	--	--	no KO assigned | (RefSeq) protein trichome birefringence-like 5	http://www.genome.jp/dbget-bin/www_bget?sot:102583948	TBL5	PMR5 N-terminal domain||PC-Esterase||Trichome birefringence-like family||Protein trichome birefringence-like 5
364	PGSC0003DMG400018840	259.81	100.921	1.3642	0.00039131	0.0054722	UP	GO:0044260//GO:0071704//GO:0006793//GO:0008152//GO:0006796//GO:0009987//GO:0008150//GO:0043412//GO:0006464//GO:0043170//GO:0016310//GO:0044237//GO:0019538//GO:0036211//GO:0006468//GO:0044238//GO:0044267	cellular macromolecule metabolic process//organic substance metabolic process//phosphorus metabolic process//metabolic process//phosphate-containing compound metabolic process//cellular process//biological_process//macromolecule modification//cellular protein modification process//macromolecule metabolic process//phosphorylation//cellular metabolic process//protein metabolic process//protein modi…	GO:0005575//GO:0016020//GO:0016021//GO:0044425//GO:0031224	cellular_component//membrane//integral component of membrane//membrane part//intrinsic component of membrane	GO:0036094//GO:0003674//GO:0043167//GO:0032555//GO:0035639//GO:0032550//GO:0016301//GO:0005524//GO:0032553//GO:0097159//GO:0016740//GO:1901363//GO:0030554//GO:0003824//GO:0017076//GO:0097367//GO:1901265//GO:0005488//GO:0032559//GO:0032549//GO:0043168//GO:0016773//GO:0004672//GO:0016772//GO:0001882//GO:0000166//GO:0001883	small molecule binding//molecular_function//ion binding//purine ribonucleotide binding//purine ribonucleoside triphosphate binding//purine ribonucleoside binding//kinase activity//ATP binding//ribonucleotide binding//organic cyclic compound binding//transferase activity//heterocyclic compound binding//adenyl nucleotide binding//catalytic activity//purine nucleotide binding//carbohydrate derivativ…	--	--	-	Protein kinase-like domain||Protein kinase domain
365	PGSC0003DMG400018854	1505.97	720.634	1.0634	0.00022364	0.0034894	UP	GO:0009987//GO:0008150//GO:0006810//GO:0051234//GO:0055085//GO:0051179	cellular process//biological_process//transport//establishment of localization//transmembrane transport//localization	GO:0005575//GO:0016020//GO:0016021//GO:0044425//GO:0031224	cellular_component//membrane//integral component of membrane//membrane part//intrinsic component of membrane	GO:0003674//GO:0022857//GO:0005215	molecular_function//transmembrane transporter activity//transporter activity	no KO assigned | (RefSeq) hexose carrier protein HEX6-like	http://www.genome.jp/dbget-bin/www_bget?sot:102589816	-	Major facilitator, sugar transporter-like||Sugar transporter, conserved site||Major facilitator superfamily domain||Sugar/inositol transporter
366	PGSC0003DMG400019123	26.6947	0.285708	6.5459	0.0048492	0.038833	UP	GO:0044092//GO:0008152//GO:0050790//GO:0048519//GO:0008150//GO:0050789//GO:0043086//GO:0019222//GO:0009892//GO:0065009//GO:0065007	negative regulation of molecular function//metabolic process//regulation of catalytic activity//negative regulation of biological process//biological_process//regulation of biological process//negative regulation of catalytic activity//regulation of metabolic process//negative regulation of metabolic process//regulation of molecular function//biological regulation	--	--	GO:0003674//GO:0030234//GO:0004857//GO:0098772	molecular_function//enzyme regulator activity//enzyme inhibitor activity//molecular function regulator	no KO assigned | (RefSeq) 21 kDa protein	http://www.genome.jp/dbget-bin/www_bget?sot:102584082	-	Pectinesterase inhibitor domain
367	PGSC0003DMG400019149	169958	50612.7	1.7476	0.0052019	0.040689	UP	--	--	--	--	GO:0043168//GO:0032559//GO:0032549//GO:0005488//GO:1901265//GO:0097367//GO:0017076//GO:0001883//GO:0000166//GO:0001882//GO:0005524//GO:0032553//GO:0032550//GO:0032555//GO:0035639//GO:0043167//GO:0036094//GO:0003674//GO:0030554//GO:1901363//GO:0097159	anion binding//adenyl ribonucleotide binding//ribonucleoside binding//binding//nucleoside phosphate binding//carbohydrate derivative binding//purine nucleotide binding//purine nucleoside binding//nucleotide binding//nucleoside binding//ATP binding//ribonucleotide binding//purine ribonucleoside binding//purine ribonucleotide binding//purine ribonucleoside triphosphate binding//ion binding//small m…	no KO assigned | (RefSeq) RCA; ribulose bisphosphate carboxylase/oxygenase activase, chloroplastic	http://www.genome.jp/dbget-bin/www_bget?sot:102596435	-	ATPase, AAA-type, core||P-loop containing nucleoside triphosphate hydrolase
368	PGSC0003DMG400019202	253.401	123.095	1.0417	0.0061793	0.046258	UP	GO:0071704//GO:0008152//GO:0055114//GO:0008150//GO:1901360//GO:0044238//GO:0006629//GO:0008202	organic substance metabolic process//metabolic process//oxidation-reduction process//biological_process//organic cyclic compound metabolic process//primary metabolic process//lipid metabolic process//steroid metabolic process	GO:0005575//GO:0016020//GO:0005737//GO:0016021//GO:0044424//GO:0044425//GO:0005622//GO:0044464//GO:0031224//GO:0005623	cellular_component//membrane//cytoplasm//integral component of membrane//intracellular part//membrane part//intracellular//cell part//intrinsic component of membrane//cell	GO:0003674//GO:0016229//GO:0016491//GO:0003824//GO:0033765//GO:0003865//GO:0016627	molecular_function//steroid dehydrogenase activity//oxidoreductase activity//catalytic activity//steroid dehydrogenase activity, acting on the CH-CH group of donors//3-oxo-5-alpha-steroid 4-dehydrogenase activity//oxidoreductase activity, acting on the CH-CH group of donors	K09591 steroid 5-alpha-reductase [EC:1.3.1.22] | (RefSeq) steroid 5-alpha-reductase DET2	http://www.genome.jp/dbget-bin/www_bget?sot:102600919	-	3-oxo-5-alpha-steroid 4-dehydrogenase, C-terminal||3-oxo-5-alpha-steroid 4-dehydrogenase
369	PGSC0003DMG400019278	724.151	272.763	1.4086	1.0874e-05	0.00028204	UP	GO:0044267//GO:0036211//GO:0044238//GO:0006468//GO:0019538//GO:0044237//GO:0016310//GO:0032501//GO:0009875//GO:0044703//GO:0022414//GO:0043170//GO:0007154//GO:0051704//GO:0006464//GO:0043412//GO:0009856//GO:0008150//GO:0009987//GO:0008037//GO:0006796//GO:0048544//GO:0008152//GO:0006793//GO:0044706//GO:0071704//GO:0044260	cellular protein metabolic process//protein modification process//primary metabolic process//protein phosphorylation//protein metabolic process//cellular metabolic process//phosphorylation//multicellular organismal process//pollen-pistil interaction//multi-organism reproductive process//reproductive process//macromolecule metabolic process//cell communication//multi-organism process//cellular pro…	GO:0031224//GO:0044425//GO:0016021//GO:0016020//GO:0005575	intrinsic component of membrane//membrane part//integral component of membrane//membrane//cellular_component	GO:0001883//GO:0000166//GO:0016772//GO:0001882//GO:0004672//GO:0004674//GO:0016773//GO:0043168//GO:0032559//GO:0032549//GO:0005488//GO:1901265//GO:0097367//GO:0017076//GO:0030554//GO:0003824//GO:1901363//GO:0016740//GO:0097159//GO:0005524//GO:0032553//GO:0016301//GO:0032550//GO:0032555//GO:0035639//GO:0043167//GO:0036094//GO:0003674	purine nucleoside binding//nucleotide binding//transferase activity, transferring phosphorus-containing groups//nucleoside binding//protein kinase activity//protein serine/threonine kinase activity//phosphotransferase activity, alcohol group as acceptor//anion binding//adenyl ribonucleotide binding//ribonucleoside binding//binding//nucleoside phosphate binding//carbohydrate derivative binding//pu…	no KO assigned | (RefSeq) G-type lectin S-receptor-like serine/threonine-protein kinase At4g27290	http://www.genome.jp/dbget-bin/www_bget?sot:102593625	-	PAN/Apple domain||S-locus receptor kinase, C-terminal||Protein kinase domain||Protein kinase-like domain||Serine-threonine/tyrosine-protein kinase, catalytic domain||Bulb-type lectin domain||Serine/threonine-protein kinase, active site||S-locus glycoprotein domain||Protein kinase, ATP binding site
370	PGSC0003DMG400019432	1762.27	875.381	1.0094	0.00099754	0.011628	UP	--	--	--	--	--	--	no KO assigned | (RefSeq) uncharacterized LOC102584392	http://www.genome.jp/dbget-bin/www_bget?sot:102584392	--	--
371	PGSC0003DMG400019454	10948.5	5234.38	1.0646	0.00031822	0.0046194	UP	--	--	--	--	GO:0097159//GO:0050662//GO:0003824//GO:1901363//GO:0036094//GO:0003674//GO:0016854//GO:0016853//GO:0047918//GO:0016857//GO:0000166//GO:0048037//GO:1901265//GO:0051287//GO:0005488	organic cyclic compound binding//coenzyme binding//catalytic activity//heterocyclic compound binding//small molecule binding//molecular_function//racemase and epimerase activity//isomerase activity//GDP-mannose 3,5-epimerase activity//racemase and epimerase activity, acting on carbohydrates and derivatives//nucleotide binding//cofactor binding//nucleoside phosphate binding//NAD binding//binding	K10046 GDP-D-mannose 3', 5'-epimerase [EC:5.1.3.18 5.1.3.-] | (RefSeq) NAD-dependent epimerase/dehydratase family protein-like protein	http://www.genome.jp/dbget-bin/www_bget?sot:102577923	GME	NAD(P)-binding domain||NAD-dependent epimerase/dehydratase||GDP-mannose 3,5-epimerase
372	PGSC0003DMG400019458	105.036	34.6778	1.5988	0.005509	0.042544	UP	GO:0009987//GO:0015693//GO:0008150//GO:0006810//GO:0051234//GO:0030001//GO:1903830//GO:0072511//GO:0055085//GO:0006812//GO:0006811//GO:0051179//GO:0070838	cellular process//magnesium ion transport//biological_process//transport//establishment of localization//metal ion transport//magnesium ion transmembrane transport//divalent inorganic cation transport//transmembrane transport//cation transport//ion transport//localization//divalent metal ion transport	GO:0005575//GO:0043231//GO:0043227//GO:0005886//GO:0016020//GO:0005737//GO:0071944//GO:0005769//GO:0005768//GO:0043226//GO:0016021//GO:0043229//GO:0044424//GO:0044425//GO:0005622//GO:0044464//GO:0031224//GO:0012505//GO:0005623//GO:0044444	cellular_component//intracellular membrane-bounded organelle//membrane-bounded organelle//plasma membrane//membrane//cytoplasm//cell periphery//early endosome//endosome//organelle//integral component of membrane//intracellular organelle//intracellular part//membrane part//intracellular//cell part//intrinsic component of membrane//endomembrane system//cell//cytoplasmic part	GO:0003674//GO:0072509//GO:0022857//GO:0005215//GO:0046873//GO:0022890//GO:0015095//GO:0008324//GO:0015075	molecular_function//divalent inorganic cation transmembrane transporter activity//transmembrane transporter activity//transporter activity//metal ion transmembrane transporter activity//inorganic cation transmembrane transporter activity//magnesium ion transmembrane transporter activity//cation transmembrane transporter activity//ion transmembrane transporter activity	no KO assigned | (RefSeq) probable magnesium transporter NIPA6	http://www.genome.jp/dbget-bin/www_bget?sot:102589880	-	Magnesium transporter NIPA
373	PGSC0003DMG400019821	13.9415	0	Inf	0.0036236	0.031149	UP	GO:0051179//GO:0071805//GO:0006811//GO:0006812//GO:0055085//GO:0006813//GO:0030001//GO:0008150//GO:0006810//GO:0098662//GO:0051234//GO:0015672//GO:0098655//GO:0009987//GO:0071804//GO:0098660//GO:0034220	localization//potassium ion transmembrane transport//ion transport//cation transport//transmembrane transport//potassium ion transport//metal ion transport//biological_process//transport//inorganic cation transmembrane transport//establishment of localization//monovalent inorganic cation transport//cation transmembrane transport//cellular process//cellular potassium ion transport//inorganic ion t…	GO:0031224//GO:0044425//GO:0016021//GO:0016020//GO:0005575	intrinsic component of membrane//membrane part//integral component of membrane//membrane//cellular_component	GO:0015075//GO:0008324//GO:0022890//GO:0005244//GO:0005249//GO:0005261//GO:0046873//GO:0022838//GO:0005215//GO:0015079//GO:0022857//GO:0022803//GO:0005267//GO:0022832//GO:0015267//GO:0022843//GO:0005216//GO:0003674//GO:0022836//GO:0015077	ion transmembrane transporter activity//cation transmembrane transporter activity//inorganic cation transmembrane transporter activity//voltage-gated ion channel activity//voltage-gated potassium channel activity//cation channel activity//metal ion transmembrane transporter activity//substrate-specific channel activity//transporter activity//potassium ion transmembrane transporter activity//trans…	K05391 cyclic nucleotide gated channel, other eukaryote | (RefSeq) putative cyclic nucleotide-gated ion channel 8	http://www.genome.jp/dbget-bin/www_bget?sot:102590601	-	Cyclic nucleotide-binding-like||Potassium channel, voltage-dependent, EAG/ELK/ERG||RmlC-like jelly roll fold||Cyclic nucleotide-binding domain||Ion transport domain
374	PGSC0003DMG400019823	3080.39	1413.44	1.1239	0.0012403	0.013718	UP	GO:0022900//GO:0008152//GO:0015979//GO:0055114//GO:0009987//GO:0008150//GO:0044237//GO:0009773//GO:0019684//GO:0009767//GO:0006091	electron transport chain//metabolic process//photosynthesis//oxidation-reduction process//cellular process//biological_process//cellular metabolic process//photosynthetic electron transport in photosystem I//photosynthesis, light reaction//photosynthetic electron transport chain//generation of precursor metabolites and energy	GO:0043231//GO:0005575//GO:0043227//GO:0016020//GO:0031984//GO:0032991//GO:0009507//GO:0005737//GO:0034357//GO:0009579//GO:0043226//GO:0031976//GO:0098796//GO:0044436//GO:0009536//GO:0043229//GO:0044446//GO:0044422//GO:0009535//GO:0044435//GO:0042651//GO:0044425//GO:0044424//GO:0055035//GO:0005622//GO:0044464//GO:0044434//GO:0010598//GO:0009534//GO:0005623//GO:0044444	intracellular membrane-bounded organelle//cellular_component//membrane-bounded organelle//membrane//organelle subcompartment//protein-containing complex//chloroplast//cytoplasm//photosynthetic membrane//thylakoid//organelle//plastid thylakoid//membrane protein complex//thylakoid part//plastid//intracellular organelle//intracellular organelle part//organelle part//chloroplast thylakoid membrane//p…	--	--	no KO assigned | (RefSeq) photosynthetic NDH subunit of subcomplex B 1, chloroplastic	http://www.genome.jp/dbget-bin/www_bget?sot:102593855	NDF1	-
375	PGSC0003DMG400020119	248.734	91.0577	1.4498	0.0007017	0.0087873	UP	--	--	--	--	--	--	no KO assigned | (RefSeq) uncharacterized LOC102580649	http://www.genome.jp/dbget-bin/www_bget?sot:102580649	--	--
376	PGSC0003DMG400020140	733.977	321.937	1.189	7.1673e-05	0.0013913	UP	--	--	--	--	--	--	no KO assigned | (RefSeq) F-box/LRR-repeat protein 17-like	http://www.genome.jp/dbget-bin/www_bget?sot:102590325	-	F-box domain||Leucine-rich repeat domain, L domain-like
377	PGSC0003DMG400020160	186.37	26.5586	2.8109	8.2701e-09	5.1016e-07	UP	--	--	GO:0016020//GO:0005575//GO:0044425//GO:0016021//GO:0031224	membrane//cellular_component//membrane part//integral component of membrane//intrinsic component of membrane	GO:0046906//GO:0043167//GO:0003674//GO:1901363//GO:0097159//GO:0005488//GO:0046872//GO:0020037//GO:0043169	tetrapyrrole binding//ion binding//molecular_function//heterocyclic compound binding//organic cyclic compound binding//binding//metal ion binding//heme binding//cation binding	no KO assigned | (RefSeq) cytochrome b5-like	http://www.genome.jp/dbget-bin/www_bget?sot:102598635	-	Cytochrome b5, heme-binding site||Cytochrome b5-like heme/steroid binding domain
378	PGSC0003DMG400020253	269.991	68.1049	1.9871	0.006301	0.046886	UP	GO:0034654//GO:0018130//GO:1901135//GO:0050794//GO:0065007//GO:0009165//GO:0006259//GO:0090407//GO:0034641//GO:1901293//GO:0090304//GO:0007049//GO:0007275//GO:0051726//GO:0046483//GO:0044238//GO:0009058//GO:0006807//GO:0009262//GO:0044237//GO:0006753//GO:0008219//GO:0044271//GO:0006139//GO:1901360//GO:0009263//GO:0032501//GO:0043170//GO:0009059//GO:0019438//GO:0008150//GO:0044249//GO:0050789//GO:…	nucleobase-containing compound biosynthetic process//heterocycle biosynthetic process//carbohydrate derivative metabolic process//regulation of cellular process//biological regulation//nucleotide biosynthetic process//DNA metabolic process//organophosphate biosynthetic process//cellular nitrogen compound metabolic process//nucleoside phosphate biosynthetic process//nucleic acid metabolic process/…	--	--	--	--	K10808 ribonucleoside-diphosphate reductase subunit M2 [EC:1.17.4.1] | (RefSeq) ribonucleoside-diphosphate reductase small chain	http://www.genome.jp/dbget-bin/www_bget?sot:102605798	TSO2	Ribonucleotide reductase small subunit family||Ribonucleotide reductase small subunit, acitve site||Ribonucleotide reductase small subunit||Ferritin-like superfamily
379	PGSC0003DMG400020260	2331.83	1137.63	1.0354	0.00020359	0.0032531	UP	--	--	--	--	--	--	no KO assigned | (RefSeq) uncharacterized protein At3g27210-like	http://www.genome.jp/dbget-bin/www_bget?sot:102602205	--	--
380	PGSC0003DMG400020346	385.763	175.831	1.1335	0.001185	0.013263	UP	--	--	--	--	--	--	no KO assigned | (RefSeq) pentatricopeptide repeat-containing protein At3g09060	http://www.genome.jp/dbget-bin/www_bget?sot:102578283	-	Pentatricopeptide repeat||Tetratricopeptide-like helical domain
381	PGSC0003DMG400020365	7465.24	3475.16	1.1031	0.0051218	0.040252	UP	--	--	GO:0005575//GO:0016020//GO:0044425//GO:0016021//GO:0031224	cellular_component//membrane//membrane part//integral component of membrane//intrinsic component of membrane	--	--	no KO assigned | (RefSeq) phosphatidylinositol:ceramide inositolphosphotransferase 2-like	http://www.genome.jp/dbget-bin/www_bget?sot:102591979	-	Sphingomyelin synthase-like domain
382	PGSC0003DMG400020391	39.1183	5.63483	2.7954	0.0030831	0.02754	UP	GO:0051234//GO:0006810//GO:0042221//GO:0008150//GO:0009987//GO:0015893//GO:0006855//GO:0042493//GO:0050896//GO:0051179//GO:0055085	establishment of localization//transport//response to chemical//biological_process//cellular process//drug transport//drug transmembrane transport//response to drug//response to stimulus//localization//transmembrane transport	GO:0005575//GO:0016020//GO:0031224//GO:0044425//GO:0016021	cellular_component//membrane//intrinsic component of membrane//membrane part//integral component of membrane	GO:0022857//GO:0015238//GO:0015297//GO:0003674//GO:0015291//GO:0022804//GO:0005215	transmembrane transporter activity//drug transmembrane transporter activity//antiporter activity//molecular_function//secondary active transmembrane transporter activity//active transmembrane transporter activity//transporter activity	K03327 multidrug resistance protein, MATE family | (RefSeq) protein DETOXIFICATION 29-like	http://www.genome.jp/dbget-bin/www_bget?sot:102581213	-	Multi antimicrobial extrusion protein
383	PGSC0003DMG400020392	1184.53	569.323	1.057	0.0067458	0.049395	UP	GO:0009266//GO:0009628//GO:0050896//GO:0006950//GO:0008150//GO:0009409	response to temperature stimulus//response to abiotic stimulus//response to stimulus//response to stress//biological_process//response to cold	GO:0005622//GO:0044464//GO:0044434//GO:0005623//GO:0044444//GO:0009534//GO:0044422//GO:0044446//GO:0043229//GO:0044435//GO:0009535//GO:0042651//GO:0044424//GO:0055035//GO:0009579//GO:0034357//GO:0043226//GO:0031976//GO:0044436//GO:0009536//GO:0005575//GO:0043231//GO:0031984//GO:0043227//GO:0016020//GO:0005737//GO:0009507	intracellular//cell part//chloroplast part//cell//cytoplasmic part//chloroplast thylakoid//organelle part//intracellular organelle part//intracellular organelle//plastid part//chloroplast thylakoid membrane//thylakoid membrane//intracellular part//plastid thylakoid membrane//thylakoid//photosynthetic membrane//organelle//plastid thylakoid//thylakoid part//plastid//cellular_component//intracellula…	GO:0003723//GO:0005488//GO:0097159//GO:0003676//GO:1901363//GO:0003674//GO:0003729	RNA binding//binding//organic cyclic compound binding//nucleic acid binding//heterocyclic compound binding//molecular_function//mRNA binding	no KO assigned | (RefSeq) pentatricopeptide repeat-containing protein At2g37230	http://www.genome.jp/dbget-bin/www_bget?sot:102581885	-	Pentacotripeptide-repeat region of PRORP||Tetratricopeptide-like helical domain||Pentatricopeptide repeat
384	PGSC0003DMG400020417	101.911	20.6373	2.304	0.00011695	0.0020735	UP	GO:0071704//GO:0008152//GO:0008150//GO:0044238//GO:0006629	organic substance metabolic process//metabolic process//biological_process//primary metabolic process//lipid metabolic process	--	--	GO:0003674//GO:0016787//GO:0052689//GO:0004620//GO:0016298//GO:0008970//GO:0016788//GO:0003824	molecular_function//hydrolase activity//carboxylic ester hydrolase activity//phospholipase activity//lipase activity//phosphatidylcholine 1-acylhydrolase activity//hydrolase activity, acting on ester bonds//catalytic activity	no KO assigned | (RefSeq) phospholipase A1-IIdelta	http://www.genome.jp/dbget-bin/www_bget?sot:102603850	-	Alpha/Beta hydrolase fold||Fungal lipase-like domain||Phospholipase A1-II
385	PGSC0003DMG400020626	185.003	77.4323	1.2565	0.0038227	0.032446	UP	--	--	--	--	--	--	no KO assigned | (RefSeq) uncharacterized LOC102591693	http://www.genome.jp/dbget-bin/www_bget?sot:102591693	--	--
386	PGSC0003DMG400020709	42.826	7.20872	2.5707	0.0020844	0.020458	UP	--	--	GO:0005576//GO:0005575	extracellular region//cellular_component	GO:0046872//GO:0045735//GO:0030145//GO:0005488//GO:0043169//GO:0046914//GO:0043167//GO:0003674	metal ion binding//nutrient reservoir activity//manganese ion binding//binding//cation binding//transition metal ion binding//ion binding//molecular_function	no KO assigned | (RefSeq) putative germin-like protein 2-1	http://www.genome.jp/dbget-bin/www_bget?sot:102600489	-	Germin, manganese binding site||Cupin 1||Germin||RmlC-like cupin domain||RmlC-like jelly roll fold
387	PGSC0003DMG400020718	66.9264	9.22238	2.8594	0.00050621	0.0067408	UP	--	--	--	--	--	--	K13993 HSP20 family protein | (RefSeq) HSP22.7; 22.7 kDa class IV heat shock protein-like	http://www.genome.jp/dbget-bin/www_bget?sot:102601494	-	HSP20-like chaperone||Small heat shock protein HSP20||Alpha crystallin/Hsp20 domain
388	PGSC0003DMG400020896	204.079	75.2696	1.439	0.002541	0.023805	UP	GO:0008150//GO:0008152	biological_process//metabolic process	--	--	GO:0016758//GO:0016740//GO:0003824//GO:0003674//GO:0016757	transferase activity, transferring hexosyl groups//transferase activity//catalytic activity//molecular_function//transferase activity, transferring glycosyl groups	K21354 beta-D-glucosyl crocetin beta-1,6-glucosyltransferase [EC:2.4.1.330] | (RefSeq) beta-D-glucosyl crocetin beta-1,6-glucosyltransferase-like	http://www.genome.jp/dbget-bin/www_bget?sot:102604618	-	UDP-glycosyltransferase family, conserved site||UDP-glucuronosyl/UDP-glucosyltransferase
389	PGSC0003DMG400020907	118.636	35.2043	1.7527	0.0036927	0.03163	UP	GO:0006796//GO:0009987//GO:0008150//GO:0043412//GO:0044260//GO:0071704//GO:0006793//GO:0008152//GO:0019538//GO:0036211//GO:0044238//GO:0006468//GO:0044267//GO:0006464//GO:0043170//GO:0016310//GO:0044237	phosphate-containing compound metabolic process//cellular process//biological_process//macromolecule modification//cellular macromolecule metabolic process//organic substance metabolic process//phosphorus metabolic process//metabolic process//protein metabolic process//protein modification process//primary metabolic process//protein phosphorylation//cellular protein metabolic process//cellular pr…	GO:0005575//GO:0016020//GO:0031224//GO:0016021//GO:0044425	cellular_component//membrane//intrinsic component of membrane//integral component of membrane//membrane part	GO:0097159//GO:0016740//GO:1901363//GO:0003824//GO:0030554//GO:0036094//GO:0003674//GO:0043167//GO:0032555//GO:0035639//GO:0032550//GO:0016301//GO:0005524//GO:0032553//GO:0016773//GO:0004672//GO:0016772//GO:0001882//GO:0000166//GO:0001883//GO:0017076//GO:0097367//GO:1901265//GO:0005488//GO:0032549//GO:0032559//GO:0043168	organic cyclic compound binding//transferase activity//heterocyclic compound binding//catalytic activity//adenyl nucleotide binding//small molecule binding//molecular_function//ion binding//purine ribonucleotide binding//purine ribonucleoside triphosphate binding//purine ribonucleoside binding//kinase activity//ATP binding//ribonucleotide binding//phosphotransferase activity, alcohol group as acc…	no KO assigned | (RefSeq) serine/threonine-protein kinase-like protein CCR1	http://www.genome.jp/dbget-bin/www_bget?sot:102586595	CCR2	Protein kinase-like domain||Protein kinase domain||Protein kinase, ATP binding site||Regulator of chromosome condensation 1/beta-lactamase-inhibitor protein II||TNFR/NGFR cysteine-rich region||Serine/threonine-protein kinase, active site
390	PGSC0003DMG400021034	67.5609	18.0659	1.9029	0.0055041	0.042528	UP	GO:0008152//GO:0006793//GO:0071704//GO:0044260//GO:0043412//GO:0008150//GO:0009987//GO:0006796//GO:0044237//GO:0016310//GO:0043170//GO:0006464//GO:0044267//GO:0036211//GO:0044238//GO:0006468//GO:0019538	metabolic process//phosphorus metabolic process//organic substance metabolic process//cellular macromolecule metabolic process//macromolecule modification//biological_process//cellular process//phosphate-containing compound metabolic process//cellular metabolic process//phosphorylation//macromolecule metabolic process//cellular protein modification process//cellular protein metabolic process//pro…	--	--	GO:0005524//GO:0032553//GO:0016301//GO:0032550//GO:0032555//GO:0035639//GO:0043167//GO:0036094//GO:0003674//GO:0003824//GO:0030554//GO:1901363//GO:0016740//GO:0097159//GO:0043168//GO:0032549//GO:0032559//GO:0005488//GO:1901265//GO:0097367//GO:0017076//GO:0001883//GO:0000166//GO:0016772//GO:0001882//GO:0004672//GO:0004674//GO:0016773	ATP binding//ribonucleotide binding//kinase activity//purine ribonucleoside binding//purine ribonucleotide binding//purine ribonucleoside triphosphate binding//ion binding//small molecule binding//molecular_function//catalytic activity//adenyl nucleotide binding//heterocyclic compound binding//transferase activity//organic cyclic compound binding//anion binding//ribonucleoside binding//adenyl rib…	no KO assigned | (RefSeq) serine/threonine-protein kinase UCN-like	http://www.genome.jp/dbget-bin/www_bget?sot:102587402	-	Protein kinase-like domain||Protein kinase, ATP binding site||Protein kinase domain||Serine/threonine-protein kinase, active site
391	PGSC0003DMG400021074	144.899	57.1939	1.3411	0.0057998	0.04419	UP	--	--	--	--	--	--	no KO assigned | (RefSeq) uncharacterized LOC102585332	http://www.genome.jp/dbget-bin/www_bget?sot:102585332	-	Domain of unknown function DUF1985
392	PGSC0003DMG400021135	206.035	96.3531	1.0965	0.006455	0.047759	UP	GO:1901564//GO:0008150//GO:0006733//GO:0009052//GO:0019637//GO:0006796//GO:0051156//GO:0044281//GO:0009987//GO:0006793//GO:0006739//GO:0008152//GO:0055086//GO:0046496//GO:0006725//GO:0009117//GO:0071704//GO:0034641//GO:0019682//GO:0019693//GO:0006732//GO:1901135//GO:0006807//GO:0051186//GO:0046483//GO:0044238//GO:0006753//GO:0072524//GO:1901360//GO:0006139//GO:0006098//GO:0044237//GO:0019362//GO:…	organonitrogen compound metabolic process//biological_process//oxidoreduction coenzyme metabolic process//pentose-phosphate shunt, non-oxidative branch//organophosphate metabolic process//phosphate-containing compound metabolic process//glucose 6-phosphate metabolic process//small molecule metabolic process//cellular process//phosphorus metabolic process//NADP metabolic process//metabolic process…	GO:0009536//GO:0043226//GO:0009507//GO:0005737//GO:0043231//GO:0005575//GO:0043227//GO:0005623//GO:0044444//GO:0005622//GO:0044464//GO:0044424//GO:0043229	plastid//organelle//chloroplast//cytoplasm//intracellular membrane-bounded organelle//cellular_component//membrane-bounded organelle//cell//cytoplasmic part//intracellular//cell part//intracellular part//intracellular organelle	GO:0003824//GO:0016860//GO:0016853//GO:0003674//GO:0016861//GO:0004751	catalytic activity//intramolecular oxidoreductase activity//isomerase activity//molecular_function//intramolecular oxidoreductase activity, interconverting aldoses and ketoses//ribose-5-phosphate isomerase activity	K01807 ribose 5-phosphate isomerase A [EC:5.3.1.6] | (RefSeq) probable ribose-5-phosphate isomerase 4, chloroplastic	http://www.genome.jp/dbget-bin/www_bget?sot:102580638	-	Ribose 5-phosphate isomerase, type A
393	PGSC0003DMG400021213	2620.65	812.453	1.6896	4.9614e-07	1.962e-05	UP	GO:0009987//GO:0048519//GO:0050789//GO:0008150//GO:0016458//GO:0071704//GO:0010605//GO:0008152//GO:0010467//GO:0060255//GO:0065007//GO:0010468//GO:0043170//GO:0019222//GO:0031047//GO:0010629//GO:0009892	cellular process//negative regulation of biological process//regulation of biological process//biological_process//gene silencing//organic substance metabolic process//negative regulation of macromolecule metabolic process//metabolic process//gene expression//regulation of macromolecule metabolic process//biological regulation//regulation of gene expression//macromolecule metabolic process//regul…	--	--	GO:0097159//GO:0003676//GO:1901363//GO:0003674//GO:0005488	organic cyclic compound binding//nucleic acid binding//heterocyclic compound binding//molecular_function//binding	K11593 eukaryotic translation initiation factor 2C | (RefSeq) protein argonaute 2-like	http://www.genome.jp/dbget-bin/www_bget?sot:102591245	-	Protein argonaute, N-terminal||Piwi domain||Argonaute, linker 1 domain||PAZ domain||Ribonuclease H-like domain||Argonaute linker 2 domain
394	PGSC0003DMG400021247	2369.22	788.54	1.5872	8.9943e-05	0.0016793	UP	--	--	--	--	--	--	K00799 glutathione S-transferase [EC:2.5.1.18] | (RefSeq) probable glutathione S-transferase	http://www.genome.jp/dbget-bin/www_bget?sot:102603110	-	Glutathione S-transferase, C-terminal-like||Thioredoxin-like fold||Glutathione S-transferase, N-terminal
395	PGSC0003DMG400021324	181.804	31.0799	2.5483	1.4349e-07	6.6228e-06	UP	GO:0008152//GO:0032446//GO:0071704//GO:0044260//GO:0043412//GO:0016567//GO:0008150//GO:0009987//GO:0044237//GO:0043170//GO:0006464//GO:0044267//GO:0070647//GO:0044238//GO:0036211//GO:0019538	metabolic process//protein modification by small protein conjugation//organic substance metabolic process//cellular macromolecule metabolic process//macromolecule modification//protein ubiquitination//biological_process//cellular process//cellular metabolic process//macromolecule metabolic process//cellular protein modification process//cellular protein metabolic process//protein modification by …	--	--	GO:0003674//GO:0003824//GO:0016740//GO:0019787//GO:0004842	molecular_function//catalytic activity//transferase activity//ubiquitin-like protein transferase activity//ubiquitin-protein transferase activity	no KO assigned | (RefSeq) E3 ubiquitin-protein ligase PUB24-like	http://www.genome.jp/dbget-bin/www_bget?sot:102604295	PUB24	Armadillo-like helical||Armadillo-type fold||U box domain||Zinc finger, RING/FYVE/PHD-type
396	PGSC0003DMG400021325	147.157	26.7284	2.4609	1.2276e-06	4.2561e-05	UP	--	--	--	--	--	--	no KO assigned | (RefSeq) E3 ubiquitin-protein ligase PUB22-like	http://www.genome.jp/dbget-bin/www_bget?sot:102602268	-	Armadillo-like helical||Armadillo-type fold
397	PGSC0003DMG400021439	889.474	417.602	1.0908	0.00034413	0.004926	UP	GO:0008152//GO:0008150//GO:0055114	metabolic process//biological_process//oxidation-reduction process	GO:0005575//GO:0016020//GO:0044425//GO:0016021//GO:0031224	cellular_component//membrane//membrane part//integral component of membrane//intrinsic component of membrane	GO:0005506//GO:0046906//GO:0003674//GO:0043167//GO:0016491//GO:1901363//GO:0003824//GO:0097159//GO:0005488//GO:0004497//GO:0046872//GO:0016705//GO:0020037//GO:0046914//GO:0043169	iron ion binding//tetrapyrrole binding//molecular_function//ion binding//oxidoreductase activity//heterocyclic compound binding//catalytic activity//organic cyclic compound binding//binding//monooxygenase activity//metal ion binding//oxidoreductase activity, acting on paired donors, with incorporation or reduction of molecular oxygen//heme binding//transition metal ion binding//cation binding	no KO assigned | (RefSeq) premnaspirodiene oxygenase-like	http://www.genome.jp/dbget-bin/www_bget?sot:102589970	-	Cytochrome P450, conserved site||Cytochrome P450||Cytochrome P450, E-class, group I
398	PGSC0003DMG400021526	39.9134	5.82388	2.7768	0.0035314	0.030574	UP	--	--	--	--	GO:0005488//GO:0005515//GO:0046983//GO:0003674	binding//protein binding//protein dimerization activity//molecular_function	no KO assigned | (RefSeq) transcription factor bHLH85-like	http://www.genome.jp/dbget-bin/www_bget?sot:102584478	-	Myc-type, basic helix-loop-helix (bHLH) domain
399	PGSC0003DMG400021676	223.489	20.4558	3.4496	0.0049669	0.039346	UP	--	--	--	--	--	--	K14487 auxin responsive GH3 gene family | (RefSeq) probable indole-3-acetic acid-amido synthetase GH3.5	http://www.genome.jp/dbget-bin/www_bget?sot:102594435	DFL2	GH3 family
400	PGSC0003DMG400021710	142.635	7.8049	4.1918	0.0026936	0.024875	UP	--	--	--	--	--	--	no KO assigned | (RefSeq) uncharacterized LOC102597526	http://www.genome.jp/dbget-bin/www_bget?sot:102597526	-	Protein of unknown function DUF538
401	PGSC0003DMG400021785	1756.74	616.656	1.5104	1.0639e-05	0.00027729	UP	GO:0008150//GO:0008152	biological_process//metabolic process	--	--	GO:0016740//GO:0003824//GO:0016757//GO:0003674//GO:0016758	transferase activity//catalytic activity//transferase activity, transferring glycosyl groups//molecular_function//transferase activity, transferring hexosyl groups	K21374 7-deoxyloganetin glucosyltransferase [EC:2.4.1.324] | (RefSeq) 7-deoxyloganetin glucosyltransferase-like	http://www.genome.jp/dbget-bin/www_bget?sot:102599261	-	UDP-glucuronosyl/UDP-glucosyltransferase||UDP-glycosyltransferase family, conserved site
402	PGSC0003DMG400021831	4254.66	1589.17	1.4208	1.5515e-07	7.0626e-06	UP	GO:0046173//GO:0044255//GO:0006644//GO:0046165//GO:0044237//GO:0008654//GO:0044238//GO:0009058//GO:1901615//GO:1901617//GO:0019751//GO:0034637//GO:0090407//GO:0006629//GO:0071704//GO:0006021//GO:0044262//GO:0006066//GO:0006020//GO:1901576//GO:0005975//GO:0008152//GO:0006793//GO:0009987//GO:0044281//GO:0006796//GO:0008610//GO:0019637//GO:0044283//GO:0044249//GO:0008150//GO:0016051	polyol biosynthetic process//cellular lipid metabolic process//phospholipid metabolic process//alcohol biosynthetic process//cellular metabolic process//phospholipid biosynthetic process//primary metabolic process//biosynthetic process//organic hydroxy compound metabolic process//organic hydroxy compound biosynthetic process//polyol metabolic process//cellular carbohydrate biosynthetic process//o…	--	--	GO:0003674//GO:0016872//GO:0016853//GO:0004512//GO:0003824	molecular_function//intramolecular lyase activity//isomerase activity//inositol-3-phosphate synthase activity//catalytic activity	K01858 myo-inositol-1-phosphate synthase [EC:5.5.1.4] | (RefSeq) inositol-3-phosphate synthase	http://www.genome.jp/dbget-bin/www_bget?sot:102577590	-	Myo-inositol-1-phosphate synthase||NAD(P)-binding domain||Myo-inositol-1-phosphate synthase, GAPDH-like
403	PGSC0003DMG400021869	30.9529	2.95864	3.3871	0.0026368	0.024455	UP	--	--	--	--	--	--	no KO assigned | (RefSeq) uncharacterized LOC102585091	http://www.genome.jp/dbget-bin/www_bget?sot:102585091	--	--
404	PGSC0003DMG400022207	2661.86	1155.52	1.2039	1.0614e-05	0.00027689	UP	GO:0008152//GO:0016925//GO:0032446//GO:0018205//GO:0071704//GO:0044260//GO:0043412//GO:0008150//GO:0009987//GO:0018193//GO:0044237//GO:0043170//GO:0006464//GO:0070647//GO:0044267//GO:0036211//GO:0044238//GO:0019538	metabolic process//protein sumoylation//protein modification by small protein conjugation//peptidyl-lysine modification//organic substance metabolic process//cellular macromolecule metabolic process//macromolecule modification//biological_process//cellular process//peptidyl-amino acid modification//cellular metabolic process//macromolecule metabolic process//cellular protein modification process/…	GO:0043227//GO:0043231//GO:0005575//GO:0043226//GO:0044424//GO:0043229//GO:0005623//GO:0044464//GO:0005634//GO:0005622	membrane-bounded organelle//intracellular membrane-bounded organelle//cellular_component//organelle//intracellular part//intracellular organelle//cell//cell part//nucleus//intracellular	--	--	K12160 small ubiquitin-related modifier | (RefSeq) small ubiquitin-related modifier 2-like	http://www.genome.jp/dbget-bin/www_bget?sot:102602813	-	Ubiquitin domain||Sumo domain||Ubiquitin-related domain||Rad60/SUMO-like domain
405	PGSC0003DMG400022318	3071.03	1493.45	1.0401	0.00010471	0.0019049	UP	GO:0016310//GO:0043170//GO:0006464//GO:0044237//GO:0006468//GO:0044238//GO:0036211//GO:0019538//GO:0044267//GO:0071704//GO:0044260//GO:0008152//GO:0006793//GO:0009987//GO:0006796//GO:0043412//GO:0008150	phosphorylation//macromolecule metabolic process//cellular protein modification process//cellular metabolic process//protein phosphorylation//primary metabolic process//protein modification process//protein metabolic process//cellular protein metabolic process//organic substance metabolic process//cellular macromolecule metabolic process//metabolic process//phosphorus metabolic process//cellular …	--	--	GO:1901265//GO:0097367//GO:0046872//GO:0017076//GO:0043168//GO:0032549//GO:0032559//GO:0005488//GO:0043169//GO:0016773//GO:0001883//GO:0000166//GO:0001882//GO:0016772//GO:0004672//GO:0043167//GO:0003674//GO:0036094//GO:0032553//GO:0005524//GO:0016301//GO:0032550//GO:0035639//GO:0005509//GO:0032555//GO:0097159//GO:0003824//GO:0030554//GO:1901363//GO:0016740	nucleoside phosphate binding//carbohydrate derivative binding//metal ion binding//purine nucleotide binding//anion binding//ribonucleoside binding//adenyl ribonucleotide binding//binding//cation binding//phosphotransferase activity, alcohol group as acceptor//purine nucleoside binding//nucleotide binding//nucleoside binding//transferase activity, transferring phosphorus-containing groups//protein…	K13412 calcium-dependent protein kinase [EC:2.7.11.1] | (RefSeq) CDPK2; calcium-dependent protein kinase 2	http://www.genome.jp/dbget-bin/www_bget?sot:102577877	-	Protein kinase-like domain||EF-hand domain pair||Serine/threonine-protein kinase, active site||EF-Hand 1, calcium-binding site||Protein kinase, ATP binding site||Protein kinase domain||EF-hand domain
406	PGSC0003DMG400022341	194.166	17.9115	3.4383	1.9376e-11	2.2515e-09	UP	GO:0008150//GO:0006979//GO:0055114//GO:0009056//GO:0009987//GO:0044248//GO:0042744//GO:0008152//GO:0072593//GO:0050896//GO:0042743//GO:0044237//GO:0006950	biological_process//response to oxidative stress//oxidation-reduction process//catabolic process//cellular process//cellular catabolic process//hydrogen peroxide catabolic process//metabolic process//reactive oxygen species metabolic process//response to stimulus//hydrogen peroxide metabolic process//cellular metabolic process//response to stress	GO:0005575//GO:0005576	cellular_component//extracellular region	GO:0016491//GO:1901363//GO:0003824//GO:0016684//GO:0097159//GO:0004601//GO:0046906//GO:0003674//GO:0043167//GO:0020037//GO:0016209//GO:0043169//GO:0005488//GO:0046872	oxidoreductase activity//heterocyclic compound binding//catalytic activity//oxidoreductase activity, acting on peroxide as acceptor//organic cyclic compound binding//peroxidase activity//tetrapyrrole binding//molecular_function//ion binding//heme binding//antioxidant activity//cation binding//binding//metal ion binding	K00430 peroxidase [EC:1.11.1.7] | (RefSeq) suberization-associated anionic peroxidase 2-like	http://www.genome.jp/dbget-bin/www_bget?sot:102605292	-	Secretory peroxidase||Haem peroxidase, plant/fungal/bacterial||Haem peroxidase||Plant peroxidase||Peroxidase, active site||Peroxidases heam-ligand binding site
407	PGSC0003DMG400022547	21.8878	0.86039	4.669	0.0031935	0.028347	UP	--	--	--	--	GO:0043168//GO:0005488//GO:0032559//GO:0032549//GO:0097367//GO:1901265//GO:0017076//GO:0000166//GO:0001883//GO:0001882//GO:0005524//GO:0032553//GO:0032555//GO:0035639//GO:0032550//GO:0043167//GO:0036094//GO:0003674//GO:1901363//GO:0030554//GO:0097159	anion binding//binding//adenyl ribonucleotide binding//ribonucleoside binding//carbohydrate derivative binding//nucleoside phosphate binding//purine nucleotide binding//nucleotide binding//purine nucleoside binding//nucleoside binding//ATP binding//ribonucleotide binding//purine ribonucleotide binding//purine ribonucleoside triphosphate binding//purine ribonucleoside binding//ion binding//small m…	K08900 mitochondrial chaperone BCS1 | (RefSeq) protein HYPER-SENSITIVITY-RELATED 4-like	http://www.genome.jp/dbget-bin/www_bget?sot:102596073	-	P-loop containing nucleoside triphosphate hydrolase||AAA-type ATPase, N-terminal domain||ATPase, AAA-type, core
408	PGSC0003DMG400022749	26.7883	0	Inf	0.00041908	0.005785	UP	GO:0016125//GO:0008152//GO:0071704//GO:0006066//GO:1901576//GO:0044283//GO:0006694//GO:0044249//GO:0008150//GO:0009987//GO:0006720//GO:1901362//GO:0044281//GO:0008610//GO:0044237//GO:1901360//GO:0044255//GO:0016126//GO:0046165//GO:0008202//GO:1901615//GO:1901617//GO:0006629//GO:0044238//GO:0008299//GO:0009058	sterol metabolic process//metabolic process//organic substance metabolic process//alcohol metabolic process//organic substance biosynthetic process//small molecule biosynthetic process//steroid biosynthetic process//cellular biosynthetic process//biological_process//cellular process//isoprenoid metabolic process//organic cyclic compound biosynthetic process//small molecule metabolic process//lipi…	--	--	GO:0016746//GO:0003674//GO:0003824//GO:0046912//GO:0016740//GO:0004421	transferase activity, transferring acyl groups//molecular_function//catalytic activity//transferase activity, transferring acyl groups, acyl groups converted into alkyl on transfer//transferase activity//hydroxymethylglutaryl-CoA synthase activity	K01641 hydroxymethylglutaryl-CoA synthase [EC:2.3.3.10] | (RefSeq) hydroxymethylglutaryl-CoA synthase-like	http://www.genome.jp/dbget-bin/www_bget?sot:102601874	-	Hydroxymethylglutaryl-coenzyme A synthase C-terminal domain||Hydroxymethylglutaryl-CoA synthase, eukaryotic||Thiolase-like||Hydroxymethylglutaryl-coenzyme A synthase, N-terminal
409	PGSC0003DMG400022750	4060.65	1452.58	1.4831	2.2594e-08	1.2453e-06	UP	GO:0006066//GO:1901576//GO:0071704//GO:0008152//GO:0016125//GO:0008610//GO:1901362//GO:0044281//GO:0009987//GO:0006720//GO:0008150//GO:0044249//GO:0044283//GO:0006694//GO:0046165//GO:0016126//GO:0044255//GO:1901360//GO:0044237//GO:0009058//GO:0008299//GO:0044238//GO:0006629//GO:1901617//GO:1901615//GO:0008202	alcohol metabolic process//organic substance biosynthetic process//organic substance metabolic process//metabolic process//sterol metabolic process//lipid biosynthetic process//organic cyclic compound biosynthetic process//small molecule metabolic process//cellular process//isoprenoid metabolic process//biological_process//cellular biosynthetic process//small molecule biosynthetic process//steroi…	--	--	GO:0003674//GO:0016746//GO:0004421//GO:0016740//GO:0046912//GO:0003824	molecular_function//transferase activity, transferring acyl groups//hydroxymethylglutaryl-CoA synthase activity//transferase activity//transferase activity, transferring acyl groups, acyl groups converted into alkyl on transfer//catalytic activity	K01641 hydroxymethylglutaryl-CoA synthase [EC:2.3.3.10] | (RefSeq) hydroxymethylglutaryl-CoA synthase-like	http://www.genome.jp/dbget-bin/www_bget?sot:102601874	-	Hydroxymethylglutaryl-coenzyme A synthase C-terminal domain||Hydroxymethylglutaryl-CoA synthase, eukaryotic||Hydroxymethylglutaryl-coenzyme A synthase, N-terminal||Thiolase-like||Hydroxymethylglutaryl-coenzyme A synthase, active site
410	PGSC0003DMG400022764	240.167	8.50661	4.8193	0.00020237	0.0032424	UP	GO:0043436//GO:0044238//GO:0006807//GO:0019752//GO:0044237//GO:0044281//GO:0009987//GO:0006536//GO:0006082//GO:1901564//GO:0008150//GO:0071704//GO:1901605//GO:0009064//GO:0006520//GO:0043648//GO:0008152	oxoacid metabolic process//primary metabolic process//nitrogen compound metabolic process//carboxylic acid metabolic process//cellular metabolic process//small molecule metabolic process//cellular process//glutamate metabolic process//organic acid metabolic process//organonitrogen compound metabolic process//biological_process//organic substance metabolic process//alpha-amino acid metabolic proce…	--	--	GO:0016830//GO:0048037//GO:0043168//GO:0005488//GO:0097159//GO:0004351//GO:0003824//GO:1901363//GO:0043167//GO:0030170//GO:0003674//GO:0016829//GO:0016831	carbon-carbon lyase activity//cofactor binding//anion binding//binding//organic cyclic compound binding//glutamate decarboxylase activity//catalytic activity//heterocyclic compound binding//ion binding//pyridoxal phosphate binding//molecular_function//lyase activity//carboxy-lyase activity	K01580 glutamate decarboxylase [EC:4.1.1.15] | (RefSeq) glutamate decarboxylase-like	http://www.genome.jp/dbget-bin/www_bget?sot:102594980	-	Pyridoxal phosphate-dependent transferase||Pyridoxal phosphate-dependent decarboxylase||Pyridoxal phosphate-dependent transferase, major region, subdomain 1||Glutamate decarboxylase||Pyridoxal phosphate-dependent transferase, subdomain 2
411	PGSC0003DMG400022785	151.958	57.4034	1.4045	0.0024154	0.022891	UP	--	--	--	--	GO:0097159//GO:0030554//GO:1901363//GO:0043167//GO:0036094//GO:0003674//GO:0032553//GO:0032550//GO:0032555//GO:0043531//GO:0001883//GO:0000166//GO:0001882//GO:1901265//GO:0097367//GO:0017076//GO:0043168//GO:0032559//GO:0032549//GO:0005488	organic cyclic compound binding//adenyl nucleotide binding//heterocyclic compound binding//ion binding//small molecule binding//molecular_function//ribonucleotide binding//purine ribonucleoside binding//purine ribonucleotide binding//ADP binding//purine nucleoside binding//nucleotide binding//nucleoside binding//nucleoside phosphate binding//carbohydrate derivative binding//purine nucleotide bind…	no KO assigned | (RefSeq) uncharacterized LOC102604031	http://www.genome.jp/dbget-bin/www_bget?sot:102604031	-	Winged helix-turn-helix DNA-binding domain||NB-ARC||Leucine-rich repeat domain, L domain-like||P-loop containing nucleoside triphosphate hydrolase
412	PGSC0003DMG400022918	515.108	247.142	1.0595	0.0018955	0.019094	UP	--	--	--	--	--	--	no KO assigned | (RefSeq) probable pinoresinol-lariciresinol reductase 3	http://www.genome.jp/dbget-bin/www_bget?sot:102596870	-	NAD(P)-binding domain||NmrA-like domain
413	PGSC0003DMG400022936	42.5957	6.82536	2.6417	0.0046072	0.037319	UP	--	--	--	--	GO:0001882//GO:0001883//GO:0000166//GO:0032549//GO:0032559//GO:0005488//GO:0043168//GO:0017076//GO:1901265//GO:0097367//GO:0030554//GO:1901363//GO:0097159//GO:0032550//GO:0035639//GO:0032555//GO:0032553//GO:0005524//GO:0003674//GO:0036094//GO:0043167	nucleoside binding//purine nucleoside binding//nucleotide binding//ribonucleoside binding//adenyl ribonucleotide binding//binding//anion binding//purine nucleotide binding//nucleoside phosphate binding//carbohydrate derivative binding//adenyl nucleotide binding//heterocyclic compound binding//organic cyclic compound binding//purine ribonucleoside binding//purine ribonucleoside triphosphate bindin…	no KO assigned | (RefSeq) AAA-ATPase At3g28580-like	http://www.genome.jp/dbget-bin/www_bget?sot:102578794	-	ATPase, AAA-type, conserved site||P-loop containing nucleoside triphosphate hydrolase||AAA-type ATPase, N-terminal domain||AAA+ ATPase domain||ATPase, AAA-type, core
414	PGSC0003DMG400022977	46.7292	1.77074	4.7219	9.0055e-06	0.00024169	UP	--	--	--	--	--	--	no KO assigned | (RefSeq) LRR receptor-like serine/threonine-protein kinase GSO1	http://www.genome.jp/dbget-bin/www_bget?sot:102581827	-	Leucine-rich repeat||Leucine-rich repeat domain, L domain-like
415	PGSC0003DMG400022988	78.2816	17.4763	2.1633	0.00087189	0.010517	UP	--	--	GO:0005575//GO:0016020//GO:0031224//GO:0016021//GO:0044425	cellular_component//membrane//intrinsic component of membrane//integral component of membrane//membrane part	--	--	no KO assigned | (RefSeq) LRR receptor-like serine/threonine-protein kinase GSO2	http://www.genome.jp/dbget-bin/www_bget?sot:102578277	-	Leucine-rich repeat domain, L domain-like||Leucine-rich repeat, typical subtype||Leucine rich repeat 4||Leucine-rich repeat||Leucine-rich repeat-containing N-terminal, plant-type
416	PGSC0003DMG400023039	139.275	11.4636	3.6028	3.688e-07	1.5084e-05	UP	--	--	--	--	GO:0003824//GO:0003674//GO:0016787	catalytic activity//molecular_function//hydrolase activity	no KO assigned | (RefSeq) nudix hydrolase 2-like	http://www.genome.jp/dbget-bin/www_bget?sot:102600703	-	Nudix hydrolase 6-like||NUDIX hydrolase domain||NUDIX hydrolase domain-like||NUDIX hydrolase, conserved site
417	PGSC0003DMG400023147	308.457	124.201	1.3124	0.0016557	0.017144	UP	--	--	--	--	--	--	no KO assigned | (RefSeq) CRC domain-containing protein TSO1-like	http://www.genome.jp/dbget-bin/www_bget?sot:102601465	-	Lin-54 family||CRC domain||Tesmin/TSO1-like CXC domain
418	PGSC0003DMG400023159	498.342	197.5	1.3353	0.0052588	0.041048	UP	GO:0009607//GO:0008150//GO:0006950//GO:0006952//GO:0050896	response to biotic stimulus//biological_process//response to stress//defense response//response to stimulus	GO:0016020//GO:0005575//GO:0016021//GO:0044425//GO:0031224	membrane//cellular_component//integral component of membrane//membrane part//intrinsic component of membrane	GO:0005516//GO:0003674//GO:0005488//GO:0005515	calmodulin binding//molecular_function//binding//protein binding	K08472 mlo protein | (RefSeq) MLO-like protein 8	http://www.genome.jp/dbget-bin/www_bget?sot:102584727	-	Mlo-related protein
419	PGSC0003DMG400023193	111.946	1.19606	6.5484	0.0061553	0.046193	UP	GO:0008152//GO:0055114//GO:0008150	metabolic process//oxidation-reduction process//biological_process	--	--	GO:0003674//GO:0016491//GO:0003824	molecular_function//oxidoreductase activity//catalytic activity	no KO assigned | (RefSeq) secoisolariciresinol dehydrogenase-like	http://www.genome.jp/dbget-bin/www_bget?sot:102581363	-	Short-chain dehydrogenase/reductase, conserved site||Short-chain dehydrogenase/reductase SDR||NAD(P)-binding domain
420	PGSC0003DMG400023206	95.9759	28.4664	1.7534	0.0022054	0.021315	UP	GO:2001141//GO:1901576//GO:0044260//GO:0006725//GO:0034645//GO:0006351//GO:0071704//GO:0097659//GO:1903506//GO:0008152//GO:0051252//GO:1901362//GO:0080090//GO:0009987//GO:0051171//GO:2000112//GO:0006355//GO:0031326//GO:0008150//GO:0044249//GO:0031323//GO:0050789//GO:0009889//GO:0019438//GO:0009059//GO:0019219//GO:0019222//GO:0043170//GO:0044271//GO:0006139//GO:1901360//GO:0044237//GO:0009058//GO:…	regulation of RNA biosynthetic process//organic substance biosynthetic process//cellular macromolecule metabolic process//cellular aromatic compound metabolic process//cellular macromolecule biosynthetic process//transcription, DNA-templated//organic substance metabolic process//nucleic acid-templated transcription//regulation of nucleic acid-templated transcription//metabolic process//regulation…	--	--	GO:0003674//GO:0043167//GO:0008270//GO:0097159//GO:1901363//GO:0003676//GO:0046872//GO:0005488//GO:0046914//GO:0043169//GO:0003677	molecular_function//ion binding//zinc ion binding//organic cyclic compound binding//heterocyclic compound binding//nucleic acid binding//metal ion binding//binding//transition metal ion binding//cation binding//DNA binding	no KO assigned | (RefSeq) glycine-rich protein 2-like	http://www.genome.jp/dbget-bin/www_bget?sot:102596882	-	Cold shock domain||Zinc finger, CCHC-type||Nucleic acid-binding, OB-fold||Cold-shock protein, DNA-binding
421	PGSC0003DMG400023322	22.7377	0	Inf	9.1801e-05	0.0017065	UP	--	--	GO:0031224//GO:0016021//GO:0044425//GO:0016020//GO:0005575	intrinsic component of membrane//integral component of membrane//membrane part//membrane//cellular_component	GO:0017111//GO:0016887//GO:0000166//GO:0001883//GO:0001882//GO:0097367//GO:1901265//GO:0017076//GO:0043168//GO:0005488//GO:0016817//GO:0032549//GO:0032559//GO:0016462//GO:0097159//GO:1901363//GO:0003824//GO:0030554//GO:0043167//GO:0016818//GO:0036094//GO:0003674//GO:0005524//GO:0032553//GO:0032555//GO:0035639//GO:0016787//GO:0032550	nucleoside-triphosphatase activity//ATPase activity//nucleotide binding//purine nucleoside binding//nucleoside binding//carbohydrate derivative binding//nucleoside phosphate binding//purine nucleotide binding//anion binding//binding//hydrolase activity, acting on acid anhydrides//ribonucleoside binding//adenyl ribonucleotide binding//pyrophosphatase activity//organic cyclic compound binding//hete…	no KO assigned | (RefSeq) ABC transporter G family member 5	http://www.genome.jp/dbget-bin/www_bget?sot:102602360	-	P-loop containing nucleoside triphosphate hydrolase||ABC transporter-like||AAA+ ATPase domain||ABC-2 type transporter||ABC transporter, conserved site
422	PGSC0003DMG400023341	110.979	15.9154	2.8018	0.00030085	0.0044102	UP	GO:0097659//GO:0071704//GO:0006351//GO:0034645//GO:0006725//GO:0044260//GO:1901576//GO:2001141//GO:0031328//GO:0031325//GO:0008152//GO:0051252//GO:1903506//GO:0048522//GO:0010628//GO:0051171//GO:0009987//GO:1901362//GO:0080090//GO:0010604//GO:0010557//GO:0019438//GO:1902680//GO:0050789//GO:0031323//GO:0044249//GO:0009889//GO:2000112//GO:0008150//GO:0031326//GO:0006355//GO:0043170//GO:0019222//GO:…	nucleic acid-templated transcription//organic substance metabolic process//transcription, DNA-templated//cellular macromolecule biosynthetic process//cellular aromatic compound metabolic process//cellular macromolecule metabolic process//organic substance biosynthetic process//regulation of RNA biosynthetic process//positive regulation of cellular biosynthetic process//positive regulation of cell…	GO:0043227//GO:0043231//GO:0005575//GO:0043226//GO:0043229//GO:0044424//GO:0044464//GO:0005634//GO:0005622//GO:0005623	membrane-bounded organelle//intracellular membrane-bounded organelle//cellular_component//organelle//intracellular organelle//intracellular part//cell part//nucleus//intracellular//cell	GO:0043167//GO:0003700//GO:0003674//GO:0008270//GO:0097159//GO:1901363//GO:0003676//GO:0043565//GO:0046872//GO:0005488//GO:0043169//GO:0046914//GO:0003677	ion binding//DNA-binding transcription factor activity//molecular_function//zinc ion binding//organic cyclic compound binding//heterocyclic compound binding//nucleic acid binding//sequence-specific DNA binding//metal ion binding//binding//cation binding//transition metal ion binding//DNA binding	no KO assigned | (RefSeq) GATA transcription factor 8-like	http://www.genome.jp/dbget-bin/www_bget?sot:102584259	-	Zinc finger, NHR/GATA-type||Zinc finger, GATA-type||Transcription factor, GATA, plant
423	PGSC0003DMG400023435	1368.13	17.5602	6.2838	0.00038296	0.005376	UP	GO:0008150//GO:0009607//GO:0006952//GO:0050896//GO:0006950	biological_process//response to biotic stimulus//defense response//response to stimulus//response to stress	--	--	--	--	no KO assigned | (RefSeq) pathogenesis-related protein STH-2-like	http://www.genome.jp/dbget-bin/www_bget?sot:102586800	-	Bet v I/Major latex protein||Bet v I type allergen||START-like domain
[truncated: 209 more rows]
